# Supplementary material
Source: publisher figshare collection journal article supplement (https://acs.figshare.com/ndownloader/files/4748164)
Supplement: Supplementary file 1 [file 4748164]

data_mms12_1a
  
_audit_creation_method            SHELXL-97 
_chemical_name_systematic 
; 
 ? 
; 
_chemical_name_common             ? 
_chemical_melting_point           ? 
_chemical_formula_moiety          ? 
_chemical_formula_sum 
 'C10 H13 F O2 S' 
_chemical_formula_weight          216.26 
_chemical_absolute_configuration  ad
  
loop_ 
 _atom_type_symbol 
 _atom_type_description 
 _atom_type_scat_dispersion_real 
 _atom_type_scat_dispersion_imag 
 _atom_type_scat_source 
 'C'  'C'   0.0033   0.0016 
 'International Tables Vol C Tables 4.2.6.8 and 6.1.1.4' 
 'H'  'H'   0.0000   0.0000 
 'International Tables Vol C Tables 4.2.6.8 and 6.1.1.4' 
 'O'  'O'   0.0106   0.0060 
 'International Tables Vol C Tables 4.2.6.8 and 6.1.1.4' 
 'F'  'F'   0.0171   0.0103 
 'International Tables Vol C Tables 4.2.6.8 and 6.1.1.4' 
 'S'  'S'   0.1246   0.1234 
 'International Tables Vol C Tables 4.2.6.8 and 6.1.1.4' 
  
_symmetry_cell_setting            orthorhombic 
_symmetry_space_group_name_H-M    P2(1)2(1)2(1) 
  
loop_ 
 _symmetry_equiv_pos_as_xyz 
 'x, y, z' 
 '-x+1/2, -y, z+1/2' 
 '-x, y+1/2, -z+1/2' 
 'x+1/2, -y+1/2, -z' 
  
_cell_length_a                    5.56100(10) 
_cell_length_b                    8.6113(2) 
_cell_length_c                    21.9162(5) 
_cell_angle_alpha                 90.00 
_cell_angle_beta                  90.00 
_cell_angle_gamma                 90.00 
_cell_volume                      1049.51(4) 
_cell_formula_units_Z             4 
_cell_measurement_temperature     223(2) 
_cell_measurement_reflns_used     4122 
_cell_measurement_theta_min       0.998 
_cell_measurement_theta_max       30.034 
  
_exptl_crystal_description        lath 
_exptl_crystal_colour             colourless 
_exptl_crystal_size_max           0.32 
_exptl_crystal_size_mid           0.30 
_exptl_crystal_size_min           0.10 
_exptl_crystal_density_meas       ? 
_exptl_crystal_density_diffrn     1.369 
_exptl_crystal_density_method     'not measured' 
_exptl_crystal_F_000              456 
_exptl_absorpt_coefficient_mu     0.294 
_exptl_absorpt_correction_type    none 
_exptl_absorpt_correction_T_min   ? 
_exptl_absorpt_correction_T_max   ? 
_exptl_absorpt_process_details    ? 
  
_exptl_special_details 
; 
 ? 
; 
  
_diffrn_ambient_temperature       223(2) 
_diffrn_radiation_wavelength      0.71073 
_diffrn_radiation_type            MoK\a 
_diffrn_radiation_source          'fine-focus sealed tube' 
_diffrn_radiation_monochromator   graphite 
_diffrn_measurement_device_type   KappaCCD 
_diffrn_measurement_method        \w-scan 
_diffrn_detector_area_resol_mean  9 
_diffrn_standards_number          ? 
_diffrn_standards_interval_count  ? 
_diffrn_standards_interval_time   ? 
_diffrn_standards_decay_%         ? 
_diffrn_reflns_number             7279 
_diffrn_reflns_av_R_equivalents   0.0794 
_diffrn_reflns_av_sigmaI/netI     0.0770 
_diffrn_reflns_limit_h_min        -6 
_diffrn_reflns_limit_h_max        6 
_diffrn_reflns_limit_k_min        -10 
_diffrn_reflns_limit_k_max        10 
_diffrn_reflns_limit_l_min        -27 
_diffrn_reflns_limit_l_max        27 
_diffrn_reflns_theta_min          4.11 
_diffrn_reflns_theta_max          26.37 
_reflns_number_total              2140 
_reflns_number_gt                 1324 
_reflns_threshold_expression      >2sigma(I) 
  
_computing_data_collection        'Collect (Nonius BV, 1997-2000)' 
_computing_cell_refinement        'HKL Denzo (Otwinowski & Minor, 1997)' 
_computing_data_reduction         'HKL Scalepack (Otwinowski & Minor, 1997)' 
_computing_structure_solution     'SHELXS-97 (Sheldrick, 1990)' 
_computing_structure_refinement   'SHELXL-97 (Sheldrick, 1997)' 
_computing_molecular_graphics     'SHELXTL v6.14 (Bruker AXS, 2000-2003)' 
_computing_publication_material   'SHELXL-97 (Sheldrick, 1997)' 
  
_refine_special_details 
; 
 Refinement of F^2^ against ALL reflections.  The weighted R-factor wR and 
 goodness of fit S are based on F^2^, conventional R-factors R are based 
 on F, with F set to zero for negative F^2^. The threshold expression of 
 F^2^ > 2sigma(F^2^) is used only for calculating R-factors(gt) etc. and is 
 not relevant to the choice of reflections for refinement.  R-factors based 
 on F^2^ are statistically about twice as large as those based on F, and R- 
 factors based on ALL data will be even larger. 
; 
  
_refine_ls_structure_factor_coef  Fsqd 
_refine_ls_matrix_type            full 
_refine_ls_weighting_scheme       calc 
_refine_ls_weighting_details 
 'calc w=1/[\s^2^(Fo^2^)+(0.0417P)^2^+0.0000P] where P=(Fo^2^+2Fc^2^)/3' 
_atom_sites_solution_primary      direct 
_atom_sites_solution_secondary    difmap 
_atom_sites_solution_hydrogens    geom 
_refine_ls_hydrogen_treatment     constr 
_refine_ls_extinction_method      none 
_refine_ls_extinction_coef        ? 
_refine_ls_abs_structure_details 
 'Flack H D (1983), 866 Friedel pairs' 
_refine_ls_abs_structure_Flack    0.06(11) 
_refine_ls_number_reflns          2140 
_refine_ls_number_parameters      129 
_refine_ls_number_restraints      92 
_refine_ls_R_factor_all           0.1005 
_refine_ls_R_factor_gt            0.0473 
_refine_ls_wR_factor_ref          0.0915 
_refine_ls_wR_factor_gt           0.0796 
_refine_ls_goodness_of_fit_ref    1.003 
_refine_ls_restrained_S_all       0.983 
_refine_ls_shift/su_max           0.000 
_refine_ls_shift/su_mean          0.000 
  
loop_ 
 _atom_site_label 
 _atom_site_type_symbol 
 _atom_site_fract_x 
 _atom_site_fract_y 
 _atom_site_fract_z 
 _atom_site_U_iso_or_equiv 
 _atom_site_adp_type 
 _atom_site_occupancy 
 _atom_site_symmetry_multiplicity 
 _atom_site_calc_flag 
 _atom_site_refinement_flags 
 _atom_site_disorder_assembly 
 _atom_site_disorder_group 
S1 S 0.38672(13) 0.72317(9) 0.11960(3) 0.0519(2) Uani 1 1 d U . . 
O1 O 0.4554(5) 0.5920(2) 0.07876(9) 0.0710(7) Uani 1 1 d U . . 
O2 O 0.1545(4) 0.9355(3) 0.03492(8) 0.0612(6) Uani 1 1 d U . . 
H2 H 0.0874 0.9224 0.0015 0.092 Uiso 1 1 calc R . . 
F1 F 0.4728(3) 1.2033(2) 0.04719(8) 0.0770(6) Uani 1 1 d U . . 
C1 C 0.5186(6) 0.8961(3) 0.08741(12) 0.0472(8) Uani 1 1 d U . . 
H1A H 0.4953 0.9832 0.1156 0.057 Uiso 1 1 calc R . . 
H1B H 0.6919 0.8804 0.0821 0.057 Uiso 1 1 calc R . . 
C2 C 0.4069(5) 0.9347(3) 0.02676(12) 0.0502(8) Uani 1 1 d U . . 
H2A H 0.4491 0.8521 -0.0028 0.060 Uiso 1 1 calc R . . 
C3 C 0.5000(7) 1.0890(4) 0.00287(14) 0.0616(9) Uani 1 1 d U . . 
H3A H 0.6703 1.0790 -0.0080 0.074 Uiso 1 1 calc R . . 
H3B H 0.4108 1.1184 -0.0339 0.074 Uiso 1 1 calc R . . 
C11 C 0.5778(5) 0.7113(3) 0.18534(11) 0.0430(7) Uani 1 1 d U . . 
C12 C 0.7847(6) 0.6227(3) 0.18419(13) 0.0522(8) Uani 1 1 d U . . 
H12 H 0.8304 0.5707 0.1483 0.063 Uiso 1 1 calc R . . 
C13 C 0.9234(5) 0.6112(3) 0.23588(14) 0.0554(8) Uani 1 1 d U . . 
H13 H 1.0643 0.5510 0.2350 0.066 Uiso 1 1 calc R . . 
C14 C 0.8589(5) 0.6872(3) 0.28966(12) 0.0505(7) Uani 1 1 d U . . 
C15 C 0.6538(5) 0.7747(3) 0.28961(11) 0.0504(7) Uani 1 1 d U . . 
H15 H 0.6093 0.8281 0.3253 0.061 Uiso 1 1 calc R . . 
C16 C 0.5097(5) 0.7864(3) 0.23813(11) 0.0483(7) Uani 1 1 d U . . 
H16 H 0.3672 0.8450 0.2392 0.058 Uiso 1 1 calc R . . 
C7 C 1.0163(7) 0.6745(5) 0.34583(14) 0.0785(11) Uani 1 1 d U . . 
H7A H 1.1585 0.7384 0.3406 0.118 Uiso 1 1 calc R . . 
H7B H 1.0640 0.5672 0.3516 0.118 Uiso 1 1 calc R . . 
H7C H 0.9273 0.7098 0.3813 0.118 Uiso 1 1 calc R . . 
  
loop_ 
 _atom_site_aniso_label 
 _atom_site_aniso_U_11 
 _atom_site_aniso_U_22 
 _atom_site_aniso_U_33 
 _atom_site_aniso_U_23 
 _atom_site_aniso_U_13 
 _atom_site_aniso_U_12 
S1 0.0511(4) 0.0654(5) 0.0390(4) -0.0003(4) 0.0024(4) -0.0146(4) 
O1 0.109(2) 0.0602(14) 0.0441(11) -0.0074(10) 0.0064(12) -0.0221(13) 
O2 0.0491(13) 0.0850(16) 0.0495(11) -0.0050(12) -0.0027(11) 0.0017(11) 
F1 0.0874(14) 0.0557(11) 0.0879(13) -0.0019(11) 0.0040(11) 0.0043(10) 
C1 0.0488(18) 0.0482(17) 0.0448(16) -0.0009(13) 0.0017(14) -0.0059(15) 
C2 0.0509(19) 0.0552(19) 0.0445(17) -0.0001(14) 0.0064(16) 0.0031(16) 
C3 0.070(2) 0.0559(19) 0.0595(19) 0.0029(17) 0.0123(17) 0.0057(18) 
C11 0.0405(16) 0.0462(16) 0.0424(15) 0.0000(14) 0.0065(13) -0.0055(15) 
C12 0.055(2) 0.0510(19) 0.0502(18) -0.0058(16) 0.0131(16) -0.0023(16) 
C13 0.0432(19) 0.0519(18) 0.071(2) 0.0073(16) 0.0079(17) 0.0062(16) 
C14 0.0451(17) 0.0550(18) 0.0514(17) 0.0160(15) -0.0011(15) -0.0099(16) 
C15 0.0542(18) 0.0576(17) 0.0395(14) 0.0014(15) 0.0020(14) -0.0032(17) 
C16 0.0425(15) 0.0577(18) 0.0448(16) -0.0005(15) 0.0050(13) 0.0047(16) 
C7 0.065(2) 0.105(3) 0.065(2) 0.029(2) -0.0098(18) -0.010(2) 
  
_geom_special_details 
; 
 All esds (except the esd in the dihedral angle between two l.s. planes) 
 are estimated using the full covariance matrix.  The cell esds are taken 
 into account individually in the estimation of esds in distances, angles 
 and torsion angles; correlations between esds in cell parameters are only 
 used when they are defined by crystal symmetry.  An approximate (isotropic) 
 treatment of cell esds is used for estimating esds involving l.s. planes. 
; 
  
loop_ 
 _geom_bond_atom_site_label_1 
 _geom_bond_atom_site_label_2 
 _geom_bond_distance 
 _geom_bond_site_symmetry_2 
 _geom_bond_publ_flag 
S1 O1 1.491(2) . ? 
S1 C11 1.793(3) . ? 
S1 C1 1.803(3) . ? 
O2 C2 1.415(4) . ? 
O2 H2 0.8300 . ? 
F1 C3 1.391(3) . ? 
C1 C2 1.504(4) . ? 
C1 H1A 0.9800 . ? 
C1 H1B 0.9800 . ? 
C2 C3 1.519(4) . ? 
C2 H2A 0.9900 . ? 
C3 H3A 0.9800 . ? 
C3 H3B 0.9800 . ? 
C11 C16 1.379(3) . ? 
C11 C12 1.380(4) . ? 
C12 C13 1.374(4) . ? 
C12 H12 0.9400 . ? 
C13 C14 1.395(4) . ? 
C13 H13 0.9400 . ? 
C14 C15 1.367(4) . ? 
C14 C7 1.514(4) . ? 
C15 C16 1.387(4) . ? 
C15 H15 0.9400 . ? 
C16 H16 0.9400 . ? 
C7 H7A 0.9700 . ? 
C7 H7B 0.9700 . ? 
C7 H7C 0.9700 . ? 
  
loop_ 
 _geom_angle_atom_site_label_1 
 _geom_angle_atom_site_label_2 
 _geom_angle_atom_site_label_3 
 _geom_angle 
 _geom_angle_site_symmetry_1 
 _geom_angle_site_symmetry_3 
 _geom_angle_publ_flag 
O1 S1 C11 106.71(14) . . ? 
O1 S1 C1 106.64(12) . . ? 
C11 S1 C1 96.92(13) . . ? 
C2 O2 H2 109.5 . . ? 
C2 C1 S1 111.1(2) . . ? 
C2 C1 H1A 109.4 . . ? 
S1 C1 H1A 109.4 . . ? 
C2 C1 H1B 109.4 . . ? 
S1 C1 H1B 109.4 . . ? 
H1A C1 H1B 108.0 . . ? 
O2 C2 C1 107.4(2) . . ? 
O2 C2 C3 112.2(3) . . ? 
C1 C2 C3 110.9(3) . . ? 
O2 C2 H2A 108.8 . . ? 
C1 C2 H2A 108.8 . . ? 
C3 C2 H2A 108.8 . . ? 
F1 C3 C2 110.0(2) . . ? 
F1 C3 H3A 109.7 . . ? 
C2 C3 H3A 109.7 . . ? 
F1 C3 H3B 109.7 . . ? 
C2 C3 H3B 109.7 . . ? 
H3A C3 H3B 108.2 . . ? 
C16 C11 C12 120.2(3) . . ? 
C16 C11 S1 119.0(2) . . ? 
C12 C11 S1 120.7(2) . . ? 
C13 C12 C11 119.5(3) . . ? 
C13 C12 H12 120.2 . . ? 
C11 C12 H12 120.2 . . ? 
C12 C13 C14 121.2(3) . . ? 
C12 C13 H13 119.4 . . ? 
C14 C13 H13 119.4 . . ? 
C15 C14 C13 118.2(3) . . ? 
C15 C14 C7 121.5(3) . . ? 
C13 C14 C7 120.3(3) . . ? 
C14 C15 C16 121.5(3) . . ? 
C14 C15 H15 119.2 . . ? 
C16 C15 H15 119.2 . . ? 
C11 C16 C15 119.3(3) . . ? 
C11 C16 H16 120.3 . . ? 
C15 C16 H16 120.3 . . ? 
C14 C7 H7A 109.5 . . ? 
C14 C7 H7B 109.5 . . ? 
H7A C7 H7B 109.5 . . ? 
C14 C7 H7C 109.5 . . ? 
H7A C7 H7C 109.5 . . ? 
H7B C7 H7C 109.5 . . ? 
  
loop_ 
 _geom_torsion_atom_site_label_1 
 _geom_torsion_atom_site_label_2 
 _geom_torsion_atom_site_label_3 
 _geom_torsion_atom_site_label_4 
 _geom_torsion 
 _geom_torsion_site_symmetry_1 
 _geom_torsion_site_symmetry_2 
 _geom_torsion_site_symmetry_3 
 _geom_torsion_site_symmetry_4 
 _geom_torsion_publ_flag 
O1 S1 C1 C2 66.2(2) . . . . ? 
C11 S1 C1 C2 176.0(2) . . . . ? 
S1 C1 C2 O2 51.3(3) . . . . ? 
S1 C1 C2 C3 174.2(2) . . . . ? 
O2 C2 C3 F1 67.8(3) . . . . ? 
C1 C2 C3 F1 -52.3(3) . . . . ? 
O1 S1 C11 C16 -160.7(2) . . . . ? 
C1 S1 C11 C16 89.6(2) . . . . ? 
O1 S1 C11 C12 16.5(3) . . . . ? 
C1 S1 C11 C12 -93.2(2) . . . . ? 
C16 C11 C12 C13 -0.6(4) . . . . ? 
S1 C11 C12 C13 -177.7(2) . . . . ? 
C11 C12 C13 C14 0.1(4) . . . . ? 
C12 C13 C14 C15 -0.4(4) . . . . ? 
C12 C13 C14 C7 -179.2(3) . . . . ? 
C13 C14 C15 C16 1.1(4) . . . . ? 
C7 C14 C15 C16 179.9(3) . . . . ? 
C12 C11 C16 C15 1.3(4) . . . . ? 
S1 C11 C16 C15 178.5(2) . . . . ? 
C14 C15 C16 C11 -1.6(4) . . . . ? 
H2 O2 S1 O1 23.8 . . . . ? 
C11 S1 C2 O2 -136.32(17) . . . . ? 
O1 S1 C2 O2 110.08(18) . . . . ? 
H2 O2 C2 H2A -40.8 . . . . ? 
H2 O2 C1 H1A 152.8 . . . . ? 
  
loop_ 
 _geom_hbond_atom_site_label_D 
 _geom_hbond_atom_site_label_H 
 _geom_hbond_atom_site_label_A 
 _geom_hbond_distance_DH 
 _geom_hbond_distance_HA 
 _geom_hbond_distance_DA 
 _geom_hbond_angle_DHA 
 _geom_hbond_site_symmetry_A 
O2 H2 O1  0.83 1.91 2.737(3) 174.1 4_465 
C3 H3A O1  0.98 2.66 3.470(4) 139.9 4_565 
C2 H2A O2  0.99 2.82 3.726(3) 153.0 4_565 
C1 H1B O2  0.98 2.81 3.734(4) 156.8 1_655 
C3 H3A F1  0.98 2.66 3.364(4) 128.9 4_575 
C7 H7C F1  0.97 2.72 3.600(4) 150.7 3_645 
  
_diffrn_measured_fraction_theta_max    0.995 
_diffrn_reflns_theta_full              26.37 
_diffrn_measured_fraction_theta_full   0.995 
_refine_diff_density_max    0.160 
_refine_diff_density_min   -0.205 
_refine_diff_density_rms    0.045   

#===END
  
data_mms03_2a 
  
_audit_creation_method            SHELXL-97 
_chemical_name_systematic 
; 
 ? 
; 
_chemical_name_common             ? 
_chemical_melting_point           ? 
_chemical_formula_moiety          ? 
_chemical_formula_sum 
 'C10 H12 F2 O2 S' 
_chemical_formula_weight          234.26 
_chemical_absolute_configuration  ad
  
loop_ 
 _atom_type_symbol 
 _atom_type_description 
 _atom_type_scat_dispersion_real 
 _atom_type_scat_dispersion_imag 
 _atom_type_scat_source 
 'C'  'C'   0.0033   0.0016 
 'International Tables Vol C Tables 4.2.6.8 and 6.1.1.4' 
 'H'  'H'   0.0000   0.0000 
 'International Tables Vol C Tables 4.2.6.8 and 6.1.1.4' 
 'O'  'O'   0.0106   0.0060 
 'International Tables Vol C Tables 4.2.6.8 and 6.1.1.4' 
 'F'  'F'   0.0171   0.0103 
 'International Tables Vol C Tables 4.2.6.8 and 6.1.1.4' 
 'S'  'S'   0.1246   0.1234 
 'International Tables Vol C Tables 4.2.6.8 and 6.1.1.4' 
  
_symmetry_cell_setting            Orthorhombic 
_symmetry_space_group_name_H-M    P2(1)2(1)2(1) 
  
loop_ 
 _symmetry_equiv_pos_as_xyz 
 'x, y, z' 
 '-x+1/2, -y, z+1/2' 
 '-x, y+1/2, -z+1/2' 
 'x+1/2, -y+1/2, -z' 
  
_cell_length_a                    5.6291(7) 
_cell_length_b                    8.8502(11) 
_cell_length_c                    21.790(3) 
_cell_angle_alpha                 90.00 
_cell_angle_beta                  90.00 
_cell_angle_gamma                 90.00 
_cell_volume                      1085.6(2) 
_cell_formula_units_Z             4 
_cell_measurement_temperature     291(2) 
_cell_measurement_reflns_used     70 
_cell_measurement_theta_min       5.13 
_cell_measurement_theta_max       12.27 
  
_exptl_crystal_description        lath 
_exptl_crystal_colour             colourless 
_exptl_crystal_size_max           0.60 
_exptl_crystal_size_mid           0.34 
_exptl_crystal_size_min           0.16 
_exptl_crystal_density_meas       ? 
_exptl_crystal_density_diffrn     1.433 
_exptl_crystal_density_method     'not measured' 
_exptl_crystal_F_000              488 
_exptl_absorpt_coefficient_mu     0.303 
_exptl_absorpt_correction_type    psi-scan 
_exptl_absorpt_correction_T_min   0.902 
_exptl_absorpt_correction_T_max   0.953 
_exptl_absorpt_process_details    '(North et al., 1968)' 
  
_exptl_special_details 
; 
 ? 
; 
  
_diffrn_ambient_temperature       291(2) 
_diffrn_radiation_wavelength      0.71073 
_diffrn_radiation_type            MoK\a 
_diffrn_radiation_source          'fine-focus sealed tube' 
_diffrn_radiation_monochromator   graphite 
_diffrn_measurement_device_type   'Siemens P4' 
_diffrn_measurement_method        '\w scans' 
_diffrn_detector_area_resol_mean  ? 
_diffrn_standards_number          3 
_diffrn_standards_interval_count  247 
_diffrn_standards_interval_time   ? 
_diffrn_standards_decay_%         2.55 
_diffrn_reflns_number             4037 
_diffrn_reflns_av_R_equivalents   0.0224 
_diffrn_reflns_av_sigmaI/netI     0.0326 
_diffrn_reflns_limit_h_min        -7 
_diffrn_reflns_limit_h_max        3 
_diffrn_reflns_limit_k_min        0 
_diffrn_reflns_limit_k_max        11 
_diffrn_reflns_limit_l_min        -28 
_diffrn_reflns_limit_l_max        28 
_diffrn_reflns_theta_min          3.63 
_diffrn_reflns_theta_max          27.50 
_reflns_number_total              2500 
_reflns_number_gt                 2034 
_reflns_threshold_expression      >2sigma(I) 
  
_computing_data_collection        'Siemens XSCANS' 
_computing_cell_refinement        'Siemens XSCANS' 
_computing_data_reduction         'Siemens XSCANS' 
_computing_structure_solution     'SHELXS-97 (Sheldrick, 1990)' 
_computing_structure_refinement   'SHELXL-97 (Sheldrick, 1997)' 
_computing_molecular_graphics     'SHELXTL v6.14 (Bruker AXS, 2000-2003)' 
_computing_publication_material   'SHELXL-97 (Sheldrick, 1997)' 
  
_refine_special_details 
; 
 Refinement of F^2^ against ALL reflections.  The weighted R-factor wR and 
 goodness of fit S are based on F^2^, conventional R-factors R are based 
 on F, with F set to zero for negative F^2^. The threshold expression of 
 F^2^ > 2sigma(F^2^) is used only for calculating R-factors(gt) etc. and is 
 not relevant to the choice of reflections for refinement.  R-factors based 
 on F^2^ are statistically about twice as large as those based on F, and R- 
 factors based on ALL data will be even larger. 
; 
  
_refine_ls_structure_factor_coef  Fsqd 
_refine_ls_matrix_type            full 
_refine_ls_weighting_scheme       calc 
_refine_ls_weighting_details 
 'calc w=1/[\s^2^(Fo^2^)+(0.0440P)^2^+0.0000P] where P=(Fo^2^+2Fc^2^)/3' 
_atom_sites_solution_primary      direct 
_atom_sites_solution_secondary    difmap 
_atom_sites_solution_hydrogens    geom 
_refine_ls_hydrogen_treatment     constr
_refine_ls_extinction_method      SHELXL 
_refine_ls_extinction_coef        0.021(3) 
_refine_ls_extinction_expression 
 'Fc^*^=kFc[1+0.001xFc^2^\l^3^/sin(2\q)]^-1/4^' 
_refine_ls_abs_structure_details 
 'Flack H D (1983), Acta Cryst. A39, 876-881' 
_refine_ls_abs_structure_Flack    -0.11(8) 
_refine_ls_number_reflns          2500 
_refine_ls_number_parameters      138 
_refine_ls_number_restraints      3 
_refine_ls_R_factor_all           0.0419 
_refine_ls_R_factor_gt            0.0322 
_refine_ls_wR_factor_ref          0.0802 
_refine_ls_wR_factor_gt           0.0762 
_refine_ls_goodness_of_fit_ref    1.008 
_refine_ls_restrained_S_all       1.008 
_refine_ls_shift/su_max           0.001 
_refine_ls_shift/su_mean          0.000 
  
loop_ 
 _atom_site_label 
 _atom_site_type_symbol 
 _atom_site_fract_x 
 _atom_site_fract_y 
 _atom_site_fract_z 
 _atom_site_U_iso_or_equiv 
 _atom_site_adp_type 
 _atom_site_occupancy 
 _atom_site_symmetry_multiplicity 
 _atom_site_calc_flag 
 _atom_site_refinement_flags 
 _atom_site_disorder_assembly 
 _atom_site_disorder_group 
S1 S 1.13606(8) 0.27606(6) 0.616596(19) 0.05041(15) Uani 1 1 d . . . 
O1 O 1.0960(3) 0.39991(17) 0.57115(6) 0.0630(4) Uani 1 1 d . . . 
O2 O 1.3413(3) 0.05967(18) 0.53287(6) 0.0596(4) Uani 1 1 d . . . 
H2 H 1.4046 0.0684 0.4992 0.089 Uiso 1 1 calc R . . 
F1 F 1.0904(3) -0.12891(16) 0.45273(6) 0.0822(4) Uani 1 1 d . . . 
F2 F 1.0583(3) -0.19418(15) 0.54830(6) 0.0802(4) Uani 1 1 d . . . 
C1 C 0.9856(4) 0.1113(2) 0.58697(9) 0.0494(5) Uani 1 1 d . . . 
H1A H 0.9993 0.0288 0.6161 0.059 Uiso 1 1 calc R . . 
H1B H 0.8182 0.1335 0.5814 0.059 Uiso 1 1 calc R . . 
C2 C 1.0941(4) 0.0648(2) 0.52602(8) 0.0478(4) Uani 1 1 d . . . 
H2A H 1.0535 0.1404 0.4948 0.057 Uiso 1 1 calc R . . 
C3 C 0.9931(4) -0.0862(2) 0.50716(9) 0.0568(5) Uani 1 1 d . . . 
H3A H 0.8197 -0.0807 0.5039 0.068 Uiso 1 1 calc R . . 
C11 C 0.9379(3) 0.3084(2) 0.67956(8) 0.0464(4) Uani 1 1 d D . . 
C12 C 0.7463(4) 0.4022(2) 0.67317(9) 0.0569(5) Uani 1 1 d D . . 
H12 H 0.7163 0.4498 0.6359 0.068 Uiso 1 1 calc R . . 
C13 C 0.5978(4) 0.4251(3) 0.72280(9) 0.0630(6) Uani 1 1 d D . . 
H13 H 0.4674 0.4887 0.7184 0.076 Uiso 1 1 calc R . . 
C14 C 0.6378(4) 0.3560(2) 0.77896(8) 0.0569(5) Uani 1 1 d D . . 
C15 C 0.8327(4) 0.2632(3) 0.78412(8) 0.0617(5) Uani 1 1 d D . . 
H15 H 0.8629 0.2156 0.8214 0.074 Uiso 1 1 calc R . . 
C16 C 0.9848(4) 0.2391(3) 0.73533(8) 0.0579(5) Uani 1 1 d D . . 
H16 H 1.1170 0.1770 0.7398 0.069 Uiso 1 1 calc R . . 
C7 C 0.4738(5) 0.3826(4) 0.83228(11) 0.0860(9) Uani 1 1 d . . . 
H7A H 0.3948 0.2900 0.8427 0.103 Uiso 1 1 calc R . . 
H7B H 0.3580 0.4575 0.8213 0.103 Uiso 1 1 calc R . . 
H7C H 0.5640 0.4174 0.8669 0.103 Uiso 1 1 calc R . . 
  
loop_ 
 _atom_site_aniso_label 
 _atom_site_aniso_U_11 
 _atom_site_aniso_U_22 
 _atom_site_aniso_U_33 
 _atom_site_aniso_U_23 
 _atom_site_aniso_U_13 
 _atom_site_aniso_U_12 
S1 0.0443(2) 0.0687(3) 0.0383(2) -0.0027(2) -0.0013(2) -0.0081(2) 
O1 0.0721(10) 0.0687(9) 0.0482(7) 0.0076(7) -0.0026(7) -0.0193(8) 
O2 0.0478(8) 0.0883(11) 0.0427(7) -0.0019(7) 0.0009(6) 0.0025(8) 
F1 0.1018(11) 0.0771(9) 0.0679(8) -0.0245(7) 0.0060(8) 0.0018(9) 
F2 0.0986(11) 0.0556(7) 0.0863(9) 0.0121(7) -0.0119(8) 0.0037(7) 
C1 0.0480(11) 0.0554(11) 0.0449(10) -0.0011(8) 0.0024(8) -0.0058(9) 
C2 0.0496(11) 0.0552(11) 0.0385(8) 0.0006(8) -0.0010(8) 0.0019(9) 
C3 0.0622(13) 0.0536(11) 0.0546(11) -0.0048(9) -0.0019(10) 0.0048(10) 
C11 0.0464(10) 0.0542(10) 0.0387(8) -0.0061(8) -0.0021(7) -0.0058(9) 
C12 0.0613(12) 0.0620(12) 0.0476(10) -0.0003(10) -0.0073(10) -0.0004(11) 
C13 0.0545(12) 0.0693(13) 0.0652(13) -0.0157(11) -0.0024(11) 0.0077(11) 
C14 0.0538(11) 0.0710(13) 0.0459(9) -0.0200(9) -0.0002(10) -0.0116(12) 
C15 0.0675(13) 0.0800(14) 0.0375(8) -0.0011(9) -0.0037(9) -0.0042(13) 
C16 0.0611(12) 0.0688(13) 0.0438(9) 0.0008(10) -0.0038(8) 0.0073(11) 
C7 0.0715(16) 0.125(2) 0.0617(14) -0.0365(15) 0.0134(12) -0.0157(16) 
  
_geom_special_details 
; 
 All esds (except the esd in the dihedral angle between two l.s. planes) 
 are estimated using the full covariance matrix.  The cell esds are taken 
 into account individually in the estimation of esds in distances, angles 
 and torsion angles; correlations between esds in cell parameters are only 
 used when they are defined by crystal symmetry.  An approximate (isotropic) 
 treatment of cell esds is used for estimating esds involving l.s. planes. 
; 
  
loop_ 
 _geom_bond_atom_site_label_1 
 _geom_bond_atom_site_label_2 
 _geom_bond_distance 
 _geom_bond_site_symmetry_2 
 _geom_bond_publ_flag 
S1 O1 1.4943(15) . ? 
S1 C11 1.7912(18) . ? 
S1 C1 1.806(2) . ? 
O2 C2 1.401(3) . ? 
F1 C3 1.360(2) . ? 
F2 C3 1.361(3) . ? 
C1 C2 1.519(3) . ? 
C2 C3 1.510(3) . ? 
C11 C12 1.368(3) . ? 
C11 C16 1.387(2) . ? 
C12 C13 1.382(3) . ? 
C13 C14 1.386(3) . ? 
C14 C15 1.375(3) . ? 
C14 C7 1.503(3) . ? 
C15 C16 1.382(3) . ? 
  
loop_ 
 _geom_angle_atom_site_label_1 
 _geom_angle_atom_site_label_2 
 _geom_angle_atom_site_label_3 
 _geom_angle 
 _geom_angle_site_symmetry_1 
 _geom_angle_site_symmetry_3 
 _geom_angle_publ_flag 
O1 S1 C11 107.23(10) . . ? 
O1 S1 C1 106.54(9) . . ? 
C11 S1 C1 96.37(9) . . ? 
C2 C1 S1 110.03(14) . . ? 
O2 C2 C3 111.96(18) . . ? 
O2 C2 C1 108.37(15) . . ? 
C3 C2 C1 109.05(17) . . ? 
F1 C3 F2 105.73(17) . . ? 
F1 C3 C2 109.39(18) . . ? 
F2 C3 C2 109.96(17) . . ? 
C12 C11 C16 120.52(18) . . ? 
C12 C11 S1 120.67(14) . . ? 
C16 C11 S1 118.81(15) . . ? 
C11 C12 C13 119.11(19) . . ? 
C12 C13 C14 121.8(2) . . ? 
C15 C14 C13 117.73(19) . . ? 
C15 C14 C7 121.4(2) . . ? 
C13 C14 C7 120.9(2) . . ? 
C14 C15 C16 121.59(18) . . ? 
C15 C16 C11 119.20(19) . . ? 
  
loop_ 
 _geom_torsion_atom_site_label_1 
 _geom_torsion_atom_site_label_2 
 _geom_torsion_atom_site_label_3 
 _geom_torsion_atom_site_label_4 
 _geom_torsion 
 _geom_torsion_site_symmetry_1 
 _geom_torsion_site_symmetry_2 
 _geom_torsion_site_symmetry_3 
 _geom_torsion_site_symmetry_4 
 _geom_torsion_publ_flag 
O1 S1 C1 C2 62.35(17) . . . . ? 
C11 S1 C1 C2 172.48(14) . . . . ? 
S1 C1 C2 O2 48.9(2) . . . . ? 
O2 C2 C3 F1 -59.8(2) . . . . ? 
C1 C2 C3 F1 -179.70(17) . . . . ? 
O2 C2 C3 F2 55.9(2) . . . . ? 
C1 C2 C3 F2 -64.0(2) . . . . ? 
O1 S1 C11 C12 17.75(18) . . . . ? 
C1 S1 C11 C12 -91.80(17) . . . . ? 
O1 S1 C11 C16 -161.02(16) . . . . ? 
C1 S1 C11 C16 89.44(17) . . . . ? 
C16 C11 C12 C13 -1.0(3) . . . . ? 
S1 C11 C12 C13 -179.70(17) . . . . ? 
C11 C12 C13 C14 0.1(3) . . . . ? 
C12 C13 C14 C15 0.3(3) . . . . ? 
C12 C13 C14 C7 -180.0(2) . . . . ? 
C13 C14 C15 C16 0.1(3) . . . . ? 
C7 C14 C15 C16 -179.6(2) . . . . ? 
C14 C15 C16 C11 -0.9(3) . . . . ? 
C12 C11 C16 C15 1.3(3) . . . . ? 
S1 C11 C16 C15 -179.90(16) . . . . ? 
H2 O2 C1 H1A 152.0 . . . . ? 
H2 O2 S1 O1 20.3 . . . . ? 
H2 O2 C2 H2A -38.9 . . . . ? 
C11 S1 C2 O2 -143.18(12) . . . . ? 
O1 S1 C2 O2 104.40(12) . . . . ? 
  
loop_ 
 _geom_hbond_atom_site_label_D 
 _geom_hbond_atom_site_label_H 
 _geom_hbond_atom_site_label_A 
 _geom_hbond_distance_DH 
 _geom_hbond_distance_HA 
 _geom_hbond_distance_DA 
 _geom_hbond_angle_DHA 
 _geom_hbond_site_symmetry_A 
C7 H7A F1  0.96 2.79 3.473(3) 128.7 2_655 
C7 H7C O2  0.96 2.58 3.489(3) 158.8 3_756 
C3 H3A F2  0.98 2.73 3.351(3) 122.2 4_446 
C1 H1B O2  0.97 2.96 3.841(3) 151.8 1_455 
C12 H12 F1  0.93 2.60 3.510(3) 167.2 4_456 
C2 H2A O2  0.98 2.97 3.836(2) 147.5 4_456 
C3 H3A O1  0.98 2.61 3.260(3) 123.8 4_456 
O2 H2 O1  0.82 1.89 2.7057(19) 170.3 4_556 
  
_diffrn_measured_fraction_theta_max    0.998 
_diffrn_reflns_theta_full              27.50 
_diffrn_measured_fraction_theta_full   0.998 
_refine_diff_density_max    0.186 
_refine_diff_density_min   -0.145 
_refine_diff_density_rms    0.033 

#===END

  
data_mms08_3a
  
_audit_creation_method            SHELXL-97 
_chemical_name_systematic 
; 
 ? 
; 
_chemical_name_common             ? 
_chemical_melting_point           ? 
_chemical_formula_moiety          ? 
_chemical_formula_sum 
 'C10 H11 F3 O2 S' 
_chemical_formula_weight          252.25 
_chemical_absolute_configuration  ad
  
loop_ 
 _atom_type_symbol 
 _atom_type_description 
 _atom_type_scat_dispersion_real 
 _atom_type_scat_dispersion_imag 
 _atom_type_scat_source 
 'C'  'C'   0.0033   0.0016 
 'International Tables Vol C Tables 4.2.6.8 and 6.1.1.4' 
 'H'  'H'   0.0000   0.0000 
 'International Tables Vol C Tables 4.2.6.8 and 6.1.1.4' 
 'O'  'O'   0.0106   0.0060 
 'International Tables Vol C Tables 4.2.6.8 and 6.1.1.4' 
 'F'  'F'   0.0171   0.0103 
 'International Tables Vol C Tables 4.2.6.8 and 6.1.1.4' 
 'S'  'S'   0.1246   0.1234 
 'International Tables Vol C Tables 4.2.6.8 and 6.1.1.4' 
  
_symmetry_cell_setting            Monoclinic 
_symmetry_space_group_name_H-M    P2(1) 
  
loop_ 
 _symmetry_equiv_pos_as_xyz 
 'x, y, z' 
 '-x, y+1/2, -z' 
  
_cell_length_a                    5.0858(5) 
_cell_length_b                    9.5412(10) 
_cell_length_c                    11.5677(14) 
_cell_angle_alpha                 90.00 
_cell_angle_beta                  93.875(4) 
_cell_angle_gamma                 90.00 
_cell_volume                      560.04(11) 
_cell_formula_units_Z             2 
_cell_measurement_temperature     173(2) 
_cell_measurement_reflns_used     2222 
_cell_measurement_theta_min       0.998 
_cell_measurement_theta_max       27.485 
  
_exptl_crystal_description        prism 
_exptl_crystal_colour             colourless 
_exptl_crystal_size_max           0.44 
_exptl_crystal_size_mid           0.20 
_exptl_crystal_size_min           0.14 
_exptl_crystal_density_meas       ? 
_exptl_crystal_density_diffrn     1.496 
_exptl_crystal_density_method     'not measured' 
_exptl_crystal_F_000              260 
_exptl_absorpt_coefficient_mu     0.312 
_exptl_absorpt_correction_type    none 
_exptl_absorpt_correction_T_min   ? 
_exptl_absorpt_correction_T_max   ? 
_exptl_absorpt_process_details    ? 
  
_exptl_special_details 
; 
 ? 
; 
  
_diffrn_ambient_temperature       173(2) 
_diffrn_radiation_wavelength      0.71073 
_diffrn_radiation_type            MoK\a 
_diffrn_radiation_source          'fine-focus sealed tube' 
_diffrn_radiation_monochromator   graphite 
_diffrn_measurement_device_type   'Bruker P4' 
_diffrn_measurement_method        '\w scans' 
_diffrn_detector_area_resol_mean  9 
_diffrn_standards_number          ? 
_diffrn_standards_interval_count  ? 
_diffrn_standards_interval_time   ? 
_diffrn_standards_decay_%         ? 
_diffrn_reflns_number             4436 
_diffrn_reflns_av_R_equivalents   0.0600 
_diffrn_reflns_av_sigmaI/netI     0.0840 
_diffrn_reflns_limit_h_min        -6 
_diffrn_reflns_limit_h_max        6 
_diffrn_reflns_limit_k_min        -12 
_diffrn_reflns_limit_k_max        11 
_diffrn_reflns_limit_l_min        -14 
_diffrn_reflns_limit_l_max        14 
_diffrn_reflns_theta_min          5.17 
_diffrn_reflns_theta_max          27.44 
_reflns_number_total              2423 
_reflns_number_gt                 1664 
_reflns_threshold_expression      >2sigma(I) 
  
_computing_data_collection        'Nonius Kappa CCD' 
_computing_cell_refinement        'HKL Scalepack (Otwinowski & Minor 1997)' 
_computing_data_reduction         'HKL Denzo&Scalepack (Otwinowski&Minor 1997)' 
_computing_structure_solution     'SHELXS-97 (Sheldrick, 1990)' 
_computing_structure_refinement   'SHELXL-97 (Sheldrick, 1997)' 
_computing_molecular_graphics     'SHELXTL v6.14, Bruker 2000-2003' 
_computing_publication_material   'SHELXL-97 (Sheldrick, 1997)' 
  
_refine_special_details 
; 
 Refinement of F^2^ against ALL reflections.  The weighted R-factor wR and 
 goodness of fit S are based on F^2^, conventional R-factors R are based 
 on F, with F set to zero for negative F^2^. The threshold expression of 
 F^2^ > 2sigma(F^2^) is used only for calculating R-factors(gt) etc. and is 
 not relevant to the choice of reflections for refinement.  R-factors based 
 on F^2^ are statistically about twice as large as those based on F, and R- 
 factors based on ALL data will be even larger. 
; 
  
_refine_ls_structure_factor_coef  Fsqd 
_refine_ls_matrix_type            full 
_refine_ls_weighting_scheme       calc 
_refine_ls_weighting_details 
 'calc w=1/[\s^2^(Fo^2^)+(0.0593P)^2^+0.0000P] where P=(Fo^2^+2Fc^2^)/3' 
_atom_sites_solution_primary      direct 
_atom_sites_solution_secondary    difmap 
_atom_sites_solution_hydrogens    geom 
_refine_ls_hydrogen_treatment     constr 
_refine_ls_extinction_method      none 
_refine_ls_extinction_coef        ? 
_refine_ls_abs_structure_details 
 'Flack H D (1983), 1095' 
_refine_ls_abs_structure_Flack    -0.12(11) 
_refine_ls_number_reflns          2423 
_refine_ls_number_parameters      147 
_refine_ls_number_restraints      1 
_refine_ls_R_factor_all           0.0910 
_refine_ls_R_factor_gt            0.0533 
_refine_ls_wR_factor_ref          0.1243 
_refine_ls_wR_factor_gt           0.1116 
_refine_ls_goodness_of_fit_ref    1.032 
_refine_ls_restrained_S_all       1.031 
_refine_ls_shift/su_max           0.000 
_refine_ls_shift/su_mean          0.000 
  
loop_ 
 _atom_site_label 
 _atom_site_type_symbol 
 _atom_site_fract_x 
 _atom_site_fract_y 
 _atom_site_fract_z 
 _atom_site_U_iso_or_equiv 
 _atom_site_adp_type 
 _atom_site_occupancy 
 _atom_site_symmetry_multiplicity 
 _atom_site_calc_flag 
 _atom_site_refinement_flags 
 _atom_site_disorder_assembly 
 _atom_site_disorder_group 
S S 0.35259(17) 0.74425(8) 0.07595(7) 0.0503(3) Uani 1 1 d . . . 
O1 O 0.6256(4) 0.7357(3) 0.0342(2) 0.0642(6) Uani 1 1 d . . . 
O2 O -0.0251(5) 0.6713(2) -0.1306(2) 0.0542(6) Uani 1 1 d . . . 
H2 H -0.1337 0.6808 -0.0796 0.081 Uiso 1 1 calc R . . 
F1 F -0.2498(5) 0.9285(2) -0.19932(19) 0.0700(6) Uani 1 1 d . . . 
F2 F 0.1295(5) 1.0093(2) -0.2363(2) 0.0738(7) Uani 1 1 d . . . 
F3 F -0.0334(5) 0.8326(3) -0.33158(19) 0.0765(7) Uani 1 1 d . . . 
C1 C 0.1795(7) 0.8658(3) -0.0214(3) 0.0464(8) Uani 1 1 d . . . 
H1A H 0.0116 0.8943 0.0103 0.056 Uiso 1 1 calc R . . 
H1B H 0.2879 0.9508 -0.0306 0.056 Uiso 1 1 calc R . . 
C2 C 0.1255(8) 0.7944(4) -0.1372(3) 0.0506(8) Uani 1 1 d . . . 
H2A H 0.2994 0.7675 -0.1662 0.061 Uiso 1 1 calc R . . 
C3 C -0.0084(8) 0.8909(4) -0.2253(3) 0.0591(10) Uani 1 1 d . . . 
C11 C 0.3695(6) 0.8522(3) 0.2010(3) 0.0455(8) Uani 1 1 d . . . 
C12 C 0.1885(7) 0.8301(4) 0.2833(3) 0.0537(9) Uani 1 1 d . . . 
H12 H 0.0579 0.7594 0.2716 0.064 Uiso 1 1 calc R . . 
C13 C 0.1981(8) 0.9111(4) 0.3822(3) 0.0577(10) Uani 1 1 d . . . 
H13 H 0.0727 0.8960 0.4382 0.069 Uiso 1 1 calc R . . 
C14 C 0.3855(9) 1.0129(4) 0.4009(3) 0.0592(10) Uani 1 1 d . . . 
C15 C 0.5694(8) 1.0324(4) 0.3201(3) 0.0590(10) Uani 1 1 d . . . 
H15 H 0.7029 1.1012 0.3338 0.071 Uiso 1 1 calc R . . 
C16 C 0.5635(7) 0.9540(4) 0.2195(3) 0.0563(9) Uani 1 1 d . . . 
H16 H 0.6898 0.9694 0.1639 0.068 Uiso 1 1 calc R . . 
C7 C 0.3935(10) 1.1011(5) 0.5106(4) 0.0822(14) Uani 1 1 d . . . 
H7A H 0.2148 1.1106 0.5365 0.123 Uiso 1 1 calc R . . 
H7B H 0.4641 1.1942 0.4946 0.123 Uiso 1 1 calc R . . 
H7C H 0.5067 1.0555 0.5714 0.123 Uiso 1 1 calc R . . 
  
loop_ 
 _atom_site_aniso_label 
 _atom_site_aniso_U_11 
 _atom_site_aniso_U_22 
 _atom_site_aniso_U_33 
 _atom_site_aniso_U_23 
 _atom_site_aniso_U_13 
 _atom_site_aniso_U_12 
S 0.0582(5) 0.0349(4) 0.0586(5) 0.0027(4) 0.0099(3) 0.0039(4) 
O1 0.0573(14) 0.0656(16) 0.0714(15) -0.0021(15) 0.0152(11) 0.0158(15) 
O2 0.0610(16) 0.0379(12) 0.0647(16) -0.0070(11) 0.0122(11) -0.0002(12) 
F1 0.0711(15) 0.0637(14) 0.0749(14) -0.0002(11) 0.0010(11) 0.0192(12) 
F2 0.0981(19) 0.0513(14) 0.0728(14) 0.0118(11) 0.0117(13) -0.0033(12) 
F3 0.1037(18) 0.0684(16) 0.0566(13) -0.0090(11) 0.0001(12) 0.0100(13) 
C1 0.0540(19) 0.0313(17) 0.054(2) 0.0031(15) 0.0085(15) 0.0028(15) 
C2 0.054(2) 0.0402(18) 0.059(2) -0.0004(15) 0.0145(15) 0.0022(15) 
C3 0.077(3) 0.043(2) 0.058(2) -0.0035(17) 0.0089(19) 0.008(2) 
C11 0.0455(19) 0.0351(18) 0.056(2) 0.0060(15) 0.0031(15) 0.0044(15) 
C12 0.050(2) 0.045(2) 0.066(2) 0.0074(17) 0.0048(16) -0.0066(16) 
C13 0.066(2) 0.057(2) 0.051(2) 0.0000(17) 0.0093(17) -0.0044(19) 
C14 0.081(3) 0.0404(19) 0.056(2) 0.0052(16) -0.0014(19) -0.0017(18) 
C15 0.070(3) 0.047(2) 0.059(2) 0.0035(17) -0.0034(19) -0.0084(17) 
C16 0.056(2) 0.049(2) 0.065(2) 0.0045(17) 0.0104(17) -0.0072(18) 
C7 0.119(4) 0.071(3) 0.055(2) -0.004(2) -0.003(2) -0.017(3) 
  
_geom_special_details 
; 
 All esds (except the esd in the dihedral angle between two l.s. planes) 
 are estimated using the full covariance matrix.  The cell esds are taken 
 into account individually in the estimation of esds in distances, angles 
 and torsion angles; correlations between esds in cell parameters are only 
 used when they are defined by crystal symmetry.  An approximate (isotropic) 
 treatment of cell esds is used for estimating esds involving l.s. planes. 
; 
  
loop_ 
 _geom_bond_atom_site_label_1 
 _geom_bond_atom_site_label_2 
 _geom_bond_distance 
 _geom_bond_site_symmetry_2 
 _geom_bond_publ_flag 
S O1 1.503(2) . ? 
S C11 1.773(3) . ? 
S C1 1.804(3) . ? 
O2 C2 1.407(4) . ? 
F1 C3 1.333(4) . ? 
F2 C3 1.340(4) . ? 
F3 C3 1.347(4) . ? 
C1 C2 1.512(5) . ? 
C2 C3 1.502(5) . ? 
C11 C12 1.384(5) . ? 
C11 C16 1.391(5) . ? 
C12 C13 1.379(5) . ? 
C13 C14 1.368(5) . ? 
C14 C15 1.379(6) . ? 
C14 C7 1.521(6) . ? 
C15 C16 1.382(5) . ? 
  
loop_ 
 _geom_angle_atom_site_label_1 
 _geom_angle_atom_site_label_2 
 _geom_angle_atom_site_label_3 
 _geom_angle 
 _geom_angle_site_symmetry_1 
 _geom_angle_site_symmetry_3 
 _geom_angle_publ_flag 
O1 S C11 107.38(16) . . ? 
O1 S C1 104.86(16) . . ? 
C11 S C1 97.51(15) . . ? 
C2 C1 S 108.4(2) . . ? 
O2 C2 C3 109.0(3) . . ? 
O2 C2 C1 113.3(3) . . ? 
C3 C2 C1 111.8(3) . . ? 
F1 C3 F2 106.9(3) . . ? 
F1 C3 F3 106.6(3) . . ? 
F2 C3 F3 106.2(3) . . ? 
F1 C3 C2 113.2(3) . . ? 
F2 C3 C2 111.4(3) . . ? 
F3 C3 C2 112.1(3) . . ? 
C12 C11 C16 119.9(3) . . ? 
C12 C11 S 118.4(3) . . ? 
C16 C11 S 121.7(3) . . ? 
C13 C12 C11 119.8(3) . . ? 
C14 C13 C12 121.0(3) . . ? 
C13 C14 C15 119.0(4) . . ? 
C13 C14 C7 120.3(4) . . ? 
C15 C14 C7 120.7(4) . . ? 
C14 C15 C16 121.4(4) . . ? 
C15 C16 C11 118.8(3) . . ? 
  
loop_ 
 _geom_torsion_atom_site_label_1 
 _geom_torsion_atom_site_label_2 
 _geom_torsion_atom_site_label_3 
 _geom_torsion_atom_site_label_4 
 _geom_torsion 
 _geom_torsion_site_symmetry_1 
 _geom_torsion_site_symmetry_2 
 _geom_torsion_site_symmetry_3 
 _geom_torsion_site_symmetry_4 
 _geom_torsion_publ_flag 
O1 S C1 C2 72.6(3) . . . . ? 
C11 S C1 C2 -177.1(2) . . . . ? 
S C1 C2 O2 58.9(3) . . . . ? 
S C1 C2 C3 -177.5(2) . . . . ? 
O2 C2 C3 F1 60.5(4) . . . . ? 
C1 C2 C3 F1 -65.5(4) . . . . ? 
O2 C2 C3 F2 -179.1(3) . . . . ? 
C1 C2 C3 F2 54.9(4) . . . . ? 
O2 C2 C3 F3 -60.2(4) . . . . ? 
C1 C2 C3 F3 173.8(3) . . . . ? 
O1 S C11 C12 -152.2(3) . . . . ? 
C1 S C11 C12 99.6(3) . . . . ? 
O1 S C11 C16 25.8(3) . . . . ? 
C1 S C11 C16 -82.4(3) . . . . ? 
C16 C11 C12 C13 1.2(5) . . . . ? 
S C11 C12 C13 179.2(3) . . . . ? 
C11 C12 C13 C14 -0.4(6) . . . . ? 
C12 C13 C14 C15 -1.1(6) . . . . ? 
C12 C13 C14 C7 -179.9(4) . . . . ? 
C13 C14 C15 C16 1.8(6) . . . . ? 
C7 C14 C15 C16 -179.4(4) . . . . ? 
C14 C15 C16 C11 -0.9(6) . . . . ? 
C12 C11 C16 C15 -0.6(5) . . . . ? 
S C11 C16 C15 -178.5(3) . . . . ? 
O1 S C2 O2 119.41(19) . . . . ? 
C11 S C2 O2 -124.4(2) . . . . ? 
H2 O2 C2 H2A 153.0 . . . . ? 
H2 O2 S O1 176.9 . . . . ? 
H2 O2 C1 H1A -23.0 . . . . ? 
  
loop_ 
 _geom_hbond_atom_site_label_D 
 _geom_hbond_atom_site_label_H 
 _geom_hbond_atom_site_label_A 
 _geom_hbond_distance_DH 
 _geom_hbond_distance_HA 
 _geom_hbond_distance_DA 
 _geom_hbond_angle_DHA 
 _geom_hbond_site_symmetry_A 
O2 H2 O1  0.84 1.93 2.762(3) 170.5 1_455 
C1 H1A O1  0.99 2.51 3.184(4) 125.2 1_455 
C1 H1B O1  0.99 2.75 3.672(5) 154.2 2_655 
C15 H15 F3  0.95 2.78 3.708(5) 167.0 2_655 
C16 H16 O2  0.95 2.62 3.345(4) 133.6 2_655 
C12 H12 F2  0.95 2.59 3.487(4) 157.3 2_545 
C13 H13 F3  0.95 2.82 3.666(4) 148.9 1_556 
  
_diffrn_measured_fraction_theta_max    0.980 
_diffrn_reflns_theta_full              27.44 
_diffrn_measured_fraction_theta_full   0.980 
_refine_diff_density_max    0.300 
_refine_diff_density_min   -0.265 
_refine_diff_density_rms    0.051 

#====END

  
data_mms02 
  
_audit_creation_method            SHELXL-97 
_chemical_name_systematic 
; 
 ? 
; 
_chemical_name_common             ? 
_chemical_melting_point           ? 
_chemical_formula_moiety          ? 
_chemical_formula_sum 
 'C10 H11 Cl F2 O2 S' 
_chemical_formula_weight          268.70 
_chemical_absolute_configuration  rmad

  
loop_ 
 _atom_type_symbol 
 _atom_type_description 
 _atom_type_scat_dispersion_real 
 _atom_type_scat_dispersion_imag 
 _atom_type_scat_source 
 'C'  'C'   0.0033   0.0016 
 'International Tables Vol C Tables 4.2.6.8 and 6.1.1.4' 
 'H'  'H'   0.0000   0.0000 
 'International Tables Vol C Tables 4.2.6.8 and 6.1.1.4' 
 'O'  'O'   0.0106   0.0060 
 'International Tables Vol C Tables 4.2.6.8 and 6.1.1.4' 
 'F'  'F'   0.0171   0.0103 
 'International Tables Vol C Tables 4.2.6.8 and 6.1.1.4' 
 'Cl'  'Cl'   0.1484   0.1585 
 'International Tables Vol C Tables 4.2.6.8 and 6.1.1.4' 
 'S'  'S'   0.1246   0.1234 
 'International Tables Vol C Tables 4.2.6.8 and 6.1.1.4' 
  
_symmetry_cell_setting            Monoclinic 
_symmetry_space_group_name_H-M    P2(1) 
  
loop_ 
 _symmetry_equiv_pos_as_xyz 
 'x, y, z' 
 '-x, y+1/2, -z' 
  
_cell_length_a                    9.1588(17) 
_cell_length_b                    5.7511(13) 
_cell_length_c                    12.097(2) 
_cell_angle_alpha                 90.00 
_cell_angle_beta                  103.858(15) 
_cell_angle_gamma                 90.00 
_cell_volume                      618.7(2) 
_cell_formula_units_Z             2 
_cell_measurement_temperature     291(2) 
_cell_measurement_reflns_used     50 
_cell_measurement_theta_min       5.03 
_cell_measurement_theta_max       12.44 
  
_exptl_crystal_description        prism 
_exptl_crystal_colour             colourless 
_exptl_crystal_size_max           0.60 
_exptl_crystal_size_mid           0.52 
_exptl_crystal_size_min           0.48 
_exptl_crystal_density_meas       ? 
_exptl_crystal_density_diffrn     1.442 
_exptl_crystal_density_method     'not measured' 
_exptl_crystal_F_000              276 
_exptl_absorpt_coefficient_mu     0.485 
_exptl_absorpt_correction_type    psi-scan 
_exptl_absorpt_correction_T_min   0.747 
_exptl_absorpt_correction_T_max   0.792 
_exptl_absorpt_process_details    '(North et al., 1968)' 
  
_exptl_special_details 
; 
 ? 
; 
  
_diffrn_ambient_temperature       291(2) 
_diffrn_radiation_wavelength      0.71073 
_diffrn_radiation_type            MoK\a 
_diffrn_radiation_source          'fine-focus sealed tube' 
_diffrn_radiation_monochromator   graphite 
_diffrn_measurement_device_type   'Siemens P4' 
_diffrn_measurement_method        '\w scans' 
_diffrn_detector_area_resol_mean  ? 
_diffrn_standards_number          3 
_diffrn_standards_interval_count  247 
_diffrn_standards_interval_time   ? 
_diffrn_standards_decay_%         0.71 
_diffrn_reflns_number             5668 
_diffrn_reflns_av_R_equivalents   0.0267 
_diffrn_reflns_av_sigmaI/netI     0.0308 
_diffrn_reflns_limit_h_min        -11 
_diffrn_reflns_limit_h_max        11 
_diffrn_reflns_limit_k_min        -7 
_diffrn_reflns_limit_k_max        7 
_diffrn_reflns_limit_l_min        -15 
_diffrn_reflns_limit_l_max        15 
_diffrn_reflns_theta_min          3.47 
_diffrn_reflns_theta_max          27.50 
_reflns_number_total              2838 
_reflns_number_gt                 1860 
_reflns_threshold_expression      >2sigma(I) 
  
_computing_data_collection        'Siemens XSCANS' 
_computing_cell_refinement        'Siemens XSCANS' 
_computing_data_reduction         'Siemens XSCANS' 
_computing_structure_solution     'SHELXS-97 (Sheldrick, 1990)' 
_computing_structure_refinement   'SHELXL-97 (Sheldrick, 1997)' 
_computing_molecular_graphics     'SHELXTL v6.14, Bruker 2000-2003)' 
_computing_publication_material   'SHELXL-97 (Sheldrick, 1997)' 
  
_refine_special_details 
; 
 Refinement of F^2^ against ALL reflections.  The weighted R-factor wR and 
 goodness of fit S are based on F^2^, conventional R-factors R are based 
 on F, with F set to zero for negative F^2^. The threshold expression of 
 F^2^ > 2sigma(F^2^) is used only for calculating R-factors(gt) etc. and is 
 not relevant to the choice of reflections for refinement.  R-factors based 
 on F^2^ are statistically about twice as large as those based on F, and R- 
 factors based on ALL data will be even larger. 
; 
  
_refine_ls_structure_factor_coef  Fsqd 
_refine_ls_matrix_type            full 
_refine_ls_weighting_scheme       calc 
_refine_ls_weighting_details 
 'calc w=1/[\s^2^(Fo^2^)+(0.1286P)^2^+0.0106P] where P=(Fo^2^+2Fc^2^)/3' 
_atom_sites_solution_primary      direct 
_atom_sites_solution_secondary    difmap 
_atom_sites_solution_hydrogens    geom 
_refine_ls_hydrogen_treatment     constr 
_refine_ls_extinction_method      none 
_refine_ls_extinction_coef        ? 
_refine_ls_abs_structure_details 
 'Flack H D (1983), Acta Cryst. A39, 876-881' 
_refine_ls_abs_structure_Flack    0.01(18) 
_refine_ls_number_reflns          2838 
_refine_ls_number_parameters      150 
_refine_ls_number_restraints      278 
_refine_ls_R_factor_all           0.0830 
_refine_ls_R_factor_gt            0.0623 
_refine_ls_wR_factor_ref          0.2112 
_refine_ls_wR_factor_gt           0.1957 
_refine_ls_goodness_of_fit_ref    1.062 
_refine_ls_restrained_S_all       1.050 
_refine_ls_shift/su_max           0.003 
_refine_ls_shift/su_mean          0.000 
  
loop_ 
 _atom_site_label 
 _atom_site_type_symbol 
 _atom_site_fract_x 
 _atom_site_fract_y 
 _atom_site_fract_z 
 _atom_site_U_iso_or_equiv 
 _atom_site_adp_type 
 _atom_site_occupancy 
 _atom_site_symmetry_multiplicity 
 _atom_site_calc_flag 
 _atom_site_refinement_flags 
 _atom_site_disorder_assembly 
 _atom_site_disorder_group 
S1 S 0.89443(14) 0.24728(19) 0.17233(8) 0.1009(5) Uani 1 1 d U . . 
O1 O 1.0358(4) 0.3533(13) 0.1536(3) 0.158(2) Uani 1 1 d U . . 
O2 O 0.7659(6) 0.0000(6) -0.0429(4) 0.1340(15) Uani 1 1 d U . . 
H2 H 0.7924 -0.0596 -0.0965 0.174 Uiso 1 1 calc R . . 
C11 C 0.8440(4) 0.4106(7) 0.2832(3) 0.0759(9) Uani 1 1 d U . . 
C12 C 0.7398(4) 0.3254(8) 0.3348(3) 0.0845(10) Uani 1 1 d U . . 
H12 H 0.6921 0.1852 0.3105 0.101 Uiso 1 1 calc R . . 
C13 C 0.7041(4) 0.4448(8) 0.4227(4) 0.0870(10) Uani 1 1 d U . . 
H13 H 0.6328 0.3835 0.4578 0.104 Uiso 1 1 calc R . . 
C14 C 0.7711(4) 0.6518(8) 0.4599(3) 0.0837(10) Uani 1 1 d U . . 
C15 C 0.8799(4) 0.7379(8) 0.4065(3) 0.0851(9) Uani 1 1 d U . . 
H15 H 0.9275 0.8781 0.4306 0.102 Uiso 1 1 calc R . . 
C16 C 0.9170(4) 0.6188(7) 0.3195(4) 0.0830(10) Uani 1 1 d U . . 
H16 H 0.9901 0.6761 0.2850 0.100 Uiso 1 1 calc R . . 
C7 C 0.7319(5) 0.7928(11) 0.5545(4) 0.1114(17) Uani 1 1 d U . . 
H7A H 0.6248 0.7945 0.5448 0.167 Uiso 1 1 calc R . . 
H7B H 0.7677 0.9492 0.5520 0.167 Uiso 1 1 calc R . . 
H7C H 0.7784 0.7242 0.6267 0.167 Uiso 1 1 calc R . . 
C1 C 0.7463(5) 0.3478(8) 0.0571(3) 0.0875(10) Uani 1 1 d U . . 
H1A H 0.6496 0.3040 0.0703 0.105 Uiso 1 1 calc R . . 
H1B H 0.7497 0.5160 0.0523 0.105 Uiso 1 1 calc R . . 
C2 C 0.7647(5) 0.2402(9) -0.0545(3) 0.0950(10) Uani 1 1 d U A . 
H2A H 0.8615 0.2899 -0.0677 0.114 Uiso 1 1 calc R . . 
C3 C 0.6374(7) 0.3254(12) -0.1547(4) 0.1209(15) Uani 1 1 d U . . 
Cl1 Cl 0.4790(2) 0.2720(8) -0.1499(2) 0.1581(16) Uani 0.395(13) 1 d PU A 1 
F1 F 0.6506(4) 0.2273(7) -0.2715(2) 0.1638(19) Uani 0.395(13) 1 d PU A 1 
F2 F 0.6342(4) 0.5657(6) -0.1718(2) 0.1563(19) Uani 0.395(13) 1 d PU A 1 
Cl1' Cl 0.6342(4) 0.5657(6) -0.1718(2) 0.1563(19) Uani 0.265(15) 1 d PU A 2 
F1' F 0.4790(2) 0.2720(8) -0.1499(2) 0.1581(16) Uani 0.265(15) 1 d PU A 2 
F2' F 0.6506(4) 0.2273(7) -0.2715(2) 0.1638(19) Uani 0.265(15) 1 d PU A 2 
Cl1" Cl 0.6506(4) 0.2273(7) -0.2715(2) 0.1638(19) Uani 0.311(15) 1 d PU A 3 
F1" F 0.6342(4) 0.5657(6) -0.1718(2) 0.1563(19) Uani 0.311(15) 1 d PU A 3 
F2" F 0.4790(2) 0.2720(8) -0.1499(2) 0.1581(16) Uani 0.311(15) 1 d PU A 3 
  
loop_ 
 _atom_site_aniso_label 
 _atom_site_aniso_U_11 
 _atom_site_aniso_U_22 
 _atom_site_aniso_U_33 
 _atom_site_aniso_U_23 
 _atom_site_aniso_U_13 
 _atom_site_aniso_U_12 
S1 0.1262(9) 0.1005(8) 0.0795(6) 0.0053(6) 0.0313(5) 0.0315(7) 
O1 0.0950(19) 0.286(7) 0.099(2) 0.000(3) 0.0383(16) 0.032(3) 
O2 0.216(4) 0.091(2) 0.116(2) -0.0227(19) 0.079(3) -0.016(2) 
C11 0.0760(19) 0.082(2) 0.0691(18) 0.0074(16) 0.0173(14) 0.0141(16) 
C12 0.081(2) 0.086(2) 0.081(2) -0.0044(18) 0.0109(16) -0.0193(18) 
C13 0.074(2) 0.098(3) 0.093(2) -0.001(2) 0.0289(18) -0.0118(19) 
C14 0.073(2) 0.102(3) 0.0706(18) -0.0006(17) 0.0075(14) 0.0102(18) 
C15 0.0791(19) 0.079(2) 0.095(2) -0.001(2) 0.0152(16) -0.0007(19) 
C16 0.081(2) 0.085(2) 0.087(2) 0.0133(19) 0.0271(17) -0.0018(19) 
C7 0.108(3) 0.131(5) 0.093(3) -0.033(3) 0.021(2) 0.002(3) 
C1 0.104(2) 0.082(2) 0.076(2) -0.0148(18) 0.0213(18) -0.011(2) 
C2 0.120(3) 0.085(2) 0.084(2) -0.017(2) 0.0345(18) -0.013(2) 
C3 0.148(4) 0.126(3) 0.086(2) -0.029(2) 0.024(2) -0.037(3) 
Cl1 0.1132(16) 0.216(4) 0.142(2) -0.029(2) 0.0259(11) -0.0553(19) 
F1 0.206(3) 0.187(3) 0.1113(19) -0.061(2) 0.0626(17) -0.019(2) 
F2 0.216(4) 0.108(2) 0.123(2) 0.0157(14) -0.0011(19) 0.0003(17) 
Cl1' 0.216(4) 0.108(2) 0.123(2) 0.0157(14) -0.0011(19) 0.0003(17) 
F1' 0.1132(16) 0.216(4) 0.142(2) -0.029(2) 0.0259(11) -0.0553(19) 
F2' 0.206(3) 0.187(3) 0.1113(19) -0.061(2) 0.0626(17) -0.019(2) 
Cl1" 0.206(3) 0.187(3) 0.1113(19) -0.061(2) 0.0626(17) -0.019(2) 
F1" 0.216(4) 0.108(2) 0.123(2) 0.0157(14) -0.0011(19) 0.0003(17) 
F2" 0.1132(16) 0.216(4) 0.142(2) -0.029(2) 0.0259(11) -0.0553(19) 
  
_geom_special_details 
; 
 All esds (except the esd in the dihedral angle between two l.s. planes) 
 are estimated using the full covariance matrix.  The cell esds are taken 
 into account individually in the estimation of esds in distances, angles 
 and torsion angles; correlations between esds in cell parameters are only 
 used when they are defined by crystal symmetry.  An approximate (isotropic) 
 treatment of cell esds is used for estimating esds involving l.s. planes. 
; 
  
loop_ 
 _geom_bond_atom_site_label_1 
 _geom_bond_atom_site_label_2 
 _geom_bond_distance 
 _geom_bond_site_symmetry_2 
 _geom_bond_publ_flag 
S1 O1 1.496(5) . ? 
S1 C11 1.786(4) . ? 
S1 C1 1.793(4) . ? 
O2 C2 1.388(6) . ? 
C11 C12 1.351(5) . ? 
C11 C16 1.390(6) . ? 
C12 C13 1.370(6) . ? 
C13 C14 1.366(6) . ? 
C14 C15 1.402(6) . ? 
C14 C7 1.514(6) . ? 
C15 C16 1.365(6) . ? 
C1 C2 1.530(5) . ? 
C2 C3 1.547(8) . ? 
C3 F2 1.397(8) . ? 
C3 Cl1 1.497(6) . ? 
C3 F1 1.553(5) . ? 
  
loop_ 
 _geom_angle_atom_site_label_1 
 _geom_angle_atom_site_label_2 
 _geom_angle_atom_site_label_3 
 _geom_angle 
 _geom_angle_site_symmetry_1 
 _geom_angle_site_symmetry_3 
 _geom_angle_publ_flag 
O1 S1 C11 106.7(3) . . ? 
O1 S1 C1 105.8(2) . . ? 
C11 S1 C1 97.53(17) . . ? 
C12 C11 C16 120.4(4) . . ? 
C12 C11 S1 119.6(3) . . ? 
C16 C11 S1 119.9(3) . . ? 
C11 C12 C13 120.2(4) . . ? 
C14 C13 C12 121.4(3) . . ? 
C13 C14 C15 117.9(4) . . ? 
C13 C14 C7 123.2(4) . . ? 
C15 C14 C7 118.9(4) . . ? 
C16 C15 C14 121.0(4) . . ? 
C15 C16 C11 119.1(4) . . ? 
C2 C1 S1 109.4(3) . . ? 
O2 C2 C1 108.3(3) . . ? 
O2 C2 C3 112.3(4) . . ? 
C1 C2 C3 110.0(4) . . ? 
F2 C3 Cl1 102.9(5) . . ? 
F2 C3 C2 114.5(4) . . ? 
Cl1 C3 C2 117.4(4) . . ? 
F2 C3 F1 103.2(4) . . ? 
Cl1 C3 F1 104.4(3) . . ? 
C2 C3 F1 112.9(5) . . ? 
  
loop_ 
 _geom_torsion_atom_site_label_1 
 _geom_torsion_atom_site_label_2 
 _geom_torsion_atom_site_label_3 
 _geom_torsion_atom_site_label_4 
 _geom_torsion 
 _geom_torsion_site_symmetry_1 
 _geom_torsion_site_symmetry_2 
 _geom_torsion_site_symmetry_3 
 _geom_torsion_site_symmetry_4 
 _geom_torsion_publ_flag 
O1 S1 C11 C12 -166.0(3) . . . . ? 
C1 S1 C11 C12 85.0(3) . . . . ? 
O1 S1 C11 C16 11.0(4) . . . . ? 
C1 S1 C11 C16 -98.0(3) . . . . ? 
C16 C11 C12 C13 0.6(6) . . . . ? 
S1 C11 C12 C13 177.6(3) . . . . ? 
C11 C12 C13 C14 0.5(6) . . . . ? 
C12 C13 C14 C15 -1.0(6) . . . . ? 
C12 C13 C14 C7 178.2(4) . . . . ? 
C13 C14 C15 C16 0.4(6) . . . . ? 
C7 C14 C15 C16 -178.9(4) . . . . ? 
C14 C15 C16 C11 0.7(6) . . . . ? 
C12 C11 C16 C15 -1.2(5) . . . . ? 
S1 C11 C16 C15 -178.2(3) . . . . ? 
O1 S1 C1 C2 67.9(4) . . . . ? 
C11 S1 C1 C2 177.7(3) . . . . ? 
S1 C1 C2 O2 56.9(4) . . . . ? 
S1 C1 C2 C3 179.9(3) . . . . ? 
O2 C2 C3 F2 -178.3(4) . . . . ? 
C1 C2 C3 F2 61.1(5) . . . . ? 
O2 C2 C3 Cl1 61.0(5) . . . . ? 
C1 C2 C3 Cl1 -59.7(5) . . . . ? 
O2 C2 C3 F1 -60.6(5) . . . . ? 
C1 C2 C3 F1 178.8(4) . . . . ? 
H2 O2 C1 H1A 141.7 . . . . ? 
H2 O2 S1 O1 25.1 . . . . ? 
H2 O2 C2 H2A -50.8 . . . . ? 
C11 S1 C2 O2 -130.0(3) . . . . ? 
O1 S1 C2 O2 116.1(4) . . . . ? 
  
loop_ 
 _geom_hbond_atom_site_label_D 
 _geom_hbond_atom_site_label_H 
 _geom_hbond_atom_site_label_A 
 _geom_hbond_distance_DH 
 _geom_hbond_distance_HA 
 _geom_hbond_distance_DA 
 _geom_hbond_angle_DHA 
 _geom_hbond_site_symmetry_A 
C7 H7C Cl1'  0.96 3.17 3.859(6) 129.9 1_556 
C7 H7C O1  0.96 2.89 3.676(6) 140.0 2_756 
C12 H12 Cl1  0.93 3.23 4.123(6) 162.1 2_645 
O2 H2 O1  0.82 1.93 2.640(6) 144.4 2_745 
  
_diffrn_measured_fraction_theta_max    0.996 
_diffrn_reflns_theta_full              27.50 
_diffrn_measured_fraction_theta_full   0.996 
_refine_diff_density_max    0.453 
_refine_diff_density_min   -0.272 
_refine_diff_density_rms    0.048 

#===END

  
data_mms13_5a
  
_audit_creation_method            SHELXL-97 
_chemical_name_systematic 
; 
 ? 
; 
_chemical_name_common             ? 
_chemical_melting_point           ? 
_chemical_formula_moiety          ? 
_chemical_formula_sum 
 'C10 H11 Cl3 O2 S' 
_chemical_formula_weight          301.60 
_chemical_absolute_configuration  ad  
loop_ 
 _atom_type_symbol 
 _atom_type_description 
 _atom_type_scat_dispersion_real 
 _atom_type_scat_dispersion_imag 
 _atom_type_scat_source 
 'C'  'C'   0.0033   0.0016 
 'International Tables Vol C Tables 4.2.6.8 and 6.1.1.4' 
 'H'  'H'   0.0000   0.0000 
 'International Tables Vol C Tables 4.2.6.8 and 6.1.1.4' 
 'O'  'O'   0.0106   0.0060 
 'International Tables Vol C Tables 4.2.6.8 and 6.1.1.4' 
 'S'  'S'   0.1246   0.1234 
 'International Tables Vol C Tables 4.2.6.8 and 6.1.1.4' 
 'Cl'  'Cl'   0.1484   0.1585 
 'International Tables Vol C Tables 4.2.6.8 and 6.1.1.4' 
  
_symmetry_cell_setting            monoclinic 
_symmetry_space_group_name_H-M    P2(1) 
  
loop_ 
 _symmetry_equiv_pos_as_xyz 
 'x, y, z' 
 '-x, y+1/2, -z' 
  
_cell_length_a                    12.215(2) 
_cell_length_b                    6.1978(12) 
_cell_length_c                    17.611(4) 
_cell_angle_alpha                 90.00 
_cell_angle_beta                  106.52(3) 
_cell_angle_gamma                 90.00 
_cell_volume                      1278.3(5) 
_cell_formula_units_Z             4 
_cell_measurement_temperature     173(2) 
_cell_measurement_reflns_used     7030 
_cell_measurement_theta_min       0.998 
_cell_measurement_theta_max       30.034 
  
_exptl_crystal_description        prism 
_exptl_crystal_colour             colourless 
_exptl_crystal_size_max           0.42 
_exptl_crystal_size_mid           0.22 
_exptl_crystal_size_min           0.18 
_exptl_crystal_density_meas       ? 
_exptl_crystal_density_diffrn     1.567 
_exptl_crystal_density_method     'not measured' 
_exptl_crystal_F_000              616 
_exptl_absorpt_coefficient_mu     0.861 
_exptl_absorpt_correction_type    none 
_exptl_absorpt_correction_T_min   ? 
_exptl_absorpt_correction_T_max   ? 
_exptl_absorpt_process_details    ? 
  
_exptl_special_details 
; 
 ? 
; 
  
_diffrn_ambient_temperature       173(2) 
_diffrn_radiation_wavelength      0.71073 
_diffrn_radiation_type            MoK\a 
_diffrn_radiation_source          'fine-focus sealed tube' 
_diffrn_radiation_monochromator   graphite 
_diffrn_measurement_device_type   KappaCCD 
_diffrn_measurement_method        \w-scans 
_diffrn_detector_area_resol_mean  9 
_diffrn_standards_number          ? 
_diffrn_standards_interval_count  ? 
_diffrn_standards_interval_time   ? 
_diffrn_standards_decay_%         ? 
_diffrn_reflns_number             14074 
_diffrn_reflns_av_R_equivalents   0.0327 
_diffrn_reflns_av_sigmaI/netI     0.0450 
_diffrn_reflns_limit_h_min        -17 
_diffrn_reflns_limit_h_max        17 
_diffrn_reflns_limit_k_min        -8 
_diffrn_reflns_limit_k_max        8 
_diffrn_reflns_limit_l_min        -24 
_diffrn_reflns_limit_l_max        24 
_diffrn_reflns_theta_min          5.18 
_diffrn_reflns_theta_max          30.02 
_reflns_number_total              7332 
_reflns_number_gt                 6328 
_reflns_threshold_expression      >2sigma(I) 
  
_computing_data_collection        'Collect (Nonius BV, 1997-2000)' 
_computing_cell_refinement        'HKL Scalepack (Otwinowski & Minor 1997)' 
_computing_data_reduction         'HKL Denzo&Scalepack (Otwinowski&Minor 1997)' 
_computing_structure_solution     'SHELXS-97 (Sheldrick, 1990)' 
_computing_structure_refinement   'SHELXL-97 (Sheldrick, 1997)' 
_computing_molecular_graphics     'SHELXTL v6.14 (Bruker, 2000-2003)' 
_computing_publication_material   'SHELXL-97 (Sheldrick, 1997)' 
  
_refine_special_details 
; 
 Refinement of F^2^ against ALL reflections.  The weighted R-factor wR and 
 goodness of fit S are based on F^2^, conventional R-factors R are based 
 on F, with F set to zero for negative F^2^. The threshold expression of 
 F^2^ > 2sigma(F^2^) is used only for calculating R-factors(gt) etc. and is 
 not relevant to the choice of reflections for refinement.  R-factors based 
 on F^2^ are statistically about twice as large as those based on F, and R- 
 factors based on ALL data will be even larger. 
; 
  
_refine_ls_structure_factor_coef  Fsqd 
_refine_ls_matrix_type            full 
_refine_ls_weighting_scheme       calc 
_refine_ls_weighting_details 
 'calc w=1/[\s^2^(Fo^2^)+(0.0317P)^2^+0.0984P] where P=(Fo^2^+2Fc^2^)/3' 
_atom_sites_solution_primary      direct 
_atom_sites_solution_secondary    difmap 
_atom_sites_solution_hydrogens    geom 
_refine_ls_hydrogen_treatment     constr 
_refine_ls_extinction_method      none 
_refine_ls_extinction_coef        ? 
_refine_ls_abs_structure_details 
 'Flack H D (1983), Acta Cryst. A39, 876-881' 
_refine_ls_abs_structure_Flack    -0.04(4) 
_refine_ls_number_reflns          7332 
_refine_ls_number_parameters      293 
_refine_ls_number_restraints      1 
_refine_ls_R_factor_all           0.0425 
_refine_ls_R_factor_gt            0.0319 
_refine_ls_wR_factor_ref          0.0713 
_refine_ls_wR_factor_gt           0.0681 
_refine_ls_goodness_of_fit_ref    1.027 
_refine_ls_restrained_S_all       1.027 
_refine_ls_shift/su_max           0.001 
_refine_ls_shift/su_mean          0.000 
  
loop_ 
 _atom_site_label 
 _atom_site_type_symbol 
 _atom_site_fract_x 
 _atom_site_fract_y 
 _atom_site_fract_z 
 _atom_site_U_iso_or_equiv 
 _atom_site_adp_type 
 _atom_site_occupancy 
 _atom_site_symmetry_multiplicity 
 _atom_site_calc_flag 
 _atom_site_refinement_flags 
 _atom_site_disorder_assembly 
 _atom_site_disorder_group 
S1 S 0.32556(4) 0.95574(9) 0.54305(3) 0.03181(11) Uani 1 1 d . . . 
S1A S 0.66575(4) 0.43852(7) 0.97978(2) 0.02327(9) Uani 1 1 d . . . 
O1 O 0.35100(13) 0.8262(4) 0.47877(9) 0.0549(5) Uani 1 1 d . . . 
O2 O 0.53394(12) 1.2182(2) 0.62419(8) 0.0335(3) Uani 1 1 d . . . 
H2 H 0.5663 1.2730 0.5926 0.050 Uiso 1 1 calc R . . 
O1A O 0.67299(11) 0.1972(2) 0.96988(8) 0.0300(3) Uani 1 1 d . . . 
O2A O 0.41594(11) 0.3895(2) 0.96304(7) 0.0259(3) Uani 1 1 d . . . 
H2A H 0.4003 0.5164 0.9731 0.039 Uiso 1 1 calc R . . 
Cl1 Cl 0.62800(4) 1.00015(9) 0.78906(3) 0.03770(12) Uani 1 1 d . . . 
Cl2 Cl 0.77653(4) 1.05916(10) 0.68989(4) 0.04613(15) Uani 1 1 d . . . 
Cl3 Cl 0.67085(5) 0.64469(9) 0.69583(4) 0.04392(13) Uani 1 1 d . . . 
Cl1A Cl 0.38073(4) 0.39467(9) 0.73144(3) 0.03531(11) Uani 1 1 d . . . 
Cl2A Cl 0.22191(4) 0.29444(9) 0.81987(3) 0.03981(13) Uani 1 1 d . . . 
Cl3A Cl 0.31096(4) 0.72801(8) 0.82300(3) 0.03479(11) Uani 1 1 d . . . 
C1 C 0.43818(15) 0.8905(4) 0.63170(10) 0.0293(4) Uani 1 1 d . . . 
H1A H 0.4186 0.9460 0.6789 0.035 Uiso 1 1 calc R . . 
H1B H 0.4474 0.7320 0.6370 0.035 Uiso 1 1 calc R . . 
C2 C 0.54884(15) 0.9933(3) 0.62596(11) 0.0276(4) Uani 1 1 d . . . 
H2B H 0.5643 0.9457 0.5757 0.033 Uiso 1 1 calc R . . 
C3 C 0.65033(16) 0.9264(4) 0.69730(11) 0.0306(4) Uani 1 1 d . . . 
C11 C 0.21384(15) 0.8169(4) 0.57028(10) 0.0277(4) Uani 1 1 d . . . 
C12 C 0.18064(17) 0.6125(4) 0.54012(12) 0.0331(4) Uani 1 1 d . . . 
H12 H 0.2169 0.5445 0.5054 0.040 Uiso 1 1 calc R . . 
C13 C 0.09335(17) 0.5104(4) 0.56196(12) 0.0390(5) Uani 1 1 d . . . 
H13 H 0.0691 0.3715 0.5411 0.047 Uiso 1 1 calc R . . 
C14 C 0.04052(17) 0.6053(4) 0.61338(12) 0.0396(5) Uani 1 1 d . . . 
C15 C 0.07417(17) 0.8089(4) 0.64184(12) 0.0384(5) Uani 1 1 d . . . 
H15 H 0.0380 0.8763 0.6767 0.046 Uiso 1 1 calc R . . 
C16 C 0.16089(16) 0.9181(4) 0.62010(11) 0.0341(4) Uani 1 1 d . . . 
H16 H 0.1830 1.0594 0.6393 0.041 Uiso 1 1 calc R . . 
C7 C -0.0511(2) 0.4857(6) 0.63913(15) 0.0603(8) Uani 1 1 d . . . 
H7A H -0.0168 0.4144 0.6900 0.090 Uiso 1 1 calc R . . 
H7B H -0.0865 0.3773 0.5992 0.090 Uiso 1 1 calc R . . 
H7C H -0.1094 0.5882 0.6448 0.090 Uiso 1 1 calc R . . 
C1A C 0.55017(14) 0.5247(3) 0.89518(10) 0.0242(3) Uani 1 1 d . . . 
H1C H 0.5328 0.6790 0.9006 0.029 Uiso 1 1 calc R . . 
H1D H 0.5726 0.5065 0.8458 0.029 Uiso 1 1 calc R . . 
C2A C 0.44523(14) 0.3867(3) 0.89204(10) 0.0230(3) Uani 1 1 d . . . 
H2C H 0.4659 0.2344 0.8834 0.028 Uiso 1 1 calc R . . 
C3A C 0.34480(14) 0.4489(3) 0.82028(10) 0.0254(4) Uani 1 1 d . . . 
C11A C 0.77869(14) 0.5528(3) 0.94665(10) 0.0238(4) Uani 1 1 d . . . 
C12A C 0.81747(15) 0.7586(3) 0.97167(11) 0.0263(4) Uani 1 1 d . . . 
H12A H 0.7864 0.8363 1.0072 0.032 Uiso 1 1 calc R . . 
C13A C 0.90281(15) 0.8483(3) 0.94358(11) 0.0300(4) Uani 1 1 d . . . 
H13A H 0.9294 0.9897 0.9599 0.036 Uiso 1 1 calc R . . 
C14A C 0.94988(15) 0.7365(4) 0.89238(11) 0.0301(4) Uani 1 1 d . . . 
C15A C 0.91042(15) 0.5275(4) 0.86960(11) 0.0323(4) Uani 1 1 d . . . 
H15A H 0.9424 0.4478 0.8351 0.039 Uiso 1 1 calc R . . 
C16A C 0.82549(15) 0.4360(4) 0.89675(11) 0.0299(4) Uani 1 1 d . . . 
H16A H 0.7995 0.2938 0.8812 0.036 Uiso 1 1 calc R . . 
C7A C 1.04170(19) 0.8358(5) 0.86242(14) 0.0495(6) Uani 1 1 d . . . 
H7D H 1.0330 0.9931 0.8607 0.074 Uiso 1 1 calc R . . 
H7E H 1.0354 0.7817 0.8091 0.074 Uiso 1 1 calc R . . 
H7F H 1.1167 0.7976 0.8979 0.074 Uiso 1 1 calc R . . 
  
loop_ 
 _atom_site_aniso_label 
 _atom_site_aniso_U_11 
 _atom_site_aniso_U_22 
 _atom_site_aniso_U_33 
 _atom_site_aniso_U_23 
 _atom_site_aniso_U_13 
 _atom_site_aniso_U_12 
S1 0.0274(2) 0.0408(3) 0.0269(2) 0.0051(2) 0.00724(18) -0.0042(2) 
S1A 0.0246(2) 0.0223(2) 0.0239(2) 0.00218(17) 0.00846(16) 0.00033(17) 
O1 0.0434(8) 0.0981(15) 0.0278(7) -0.0168(9) 0.0175(6) -0.0186(10) 
O2 0.0349(7) 0.0295(7) 0.0399(8) 0.0028(6) 0.0169(6) -0.0040(6) 
O1A 0.0353(7) 0.0218(7) 0.0357(7) 0.0058(6) 0.0148(6) 0.0030(5) 
O2A 0.0321(6) 0.0226(6) 0.0270(6) 0.0015(5) 0.0150(5) 0.0018(5) 
Cl1 0.0409(3) 0.0423(3) 0.0277(2) -0.0027(2) 0.00611(19) -0.0082(2) 
Cl2 0.0270(2) 0.0566(4) 0.0535(3) 0.0074(3) 0.0095(2) -0.0108(2) 
Cl3 0.0409(3) 0.0317(3) 0.0545(3) -0.0007(2) 0.0060(2) 0.0054(2) 
Cl1A 0.0402(3) 0.0426(3) 0.0248(2) -0.0035(2) 0.01193(18) -0.0052(2) 
Cl2A 0.0272(2) 0.0494(3) 0.0421(3) 0.0029(2) 0.0087(2) -0.0114(2) 
Cl3A 0.0329(2) 0.0310(2) 0.0399(3) 0.0048(2) 0.0094(2) 0.0087(2) 
C1 0.0281(9) 0.0327(10) 0.0255(9) 0.0011(8) 0.0054(7) -0.0061(8) 
C2 0.0276(9) 0.0282(10) 0.0280(9) -0.0016(8) 0.0096(7) -0.0038(8) 
C3 0.0284(9) 0.0302(10) 0.0330(9) -0.0002(9) 0.0084(7) -0.0057(8) 
C11 0.0226(8) 0.0357(10) 0.0233(8) 0.0012(8) 0.0040(7) -0.0019(8) 
C12 0.0320(10) 0.0367(11) 0.0301(10) -0.0048(8) 0.0078(8) -0.0010(8) 
C13 0.0359(10) 0.0390(12) 0.0370(11) 0.0000(10) 0.0022(9) -0.0119(10) 
C14 0.0269(10) 0.0610(15) 0.0280(10) 0.0059(10) 0.0032(8) -0.0127(10) 
C15 0.0321(10) 0.0575(14) 0.0275(9) -0.0021(10) 0.0114(8) -0.0024(10) 
C16 0.0299(9) 0.0412(12) 0.0305(9) -0.0057(9) 0.0074(8) -0.0035(9) 
C7 0.0431(12) 0.092(2) 0.0461(13) 0.0038(15) 0.0139(11) -0.0283(15) 
C1A 0.0217(8) 0.0248(9) 0.0259(8) 0.0039(7) 0.0063(7) 0.0006(7) 
C2A 0.0241(8) 0.0216(8) 0.0253(8) 0.0002(7) 0.0100(7) 0.0000(7) 
C3A 0.0245(8) 0.0279(9) 0.0260(8) -0.0010(7) 0.0106(7) -0.0013(7) 
C11A 0.0202(8) 0.0261(9) 0.0249(8) 0.0046(7) 0.0063(7) 0.0017(7) 
C12A 0.0260(9) 0.0264(10) 0.0274(9) -0.0011(7) 0.0088(7) 0.0011(7) 
C13A 0.0261(9) 0.0273(10) 0.0349(10) 0.0026(8) 0.0058(8) -0.0018(7) 
C14A 0.0188(8) 0.0421(11) 0.0277(9) 0.0028(8) 0.0041(7) -0.0039(8) 
C15A 0.0249(9) 0.0434(12) 0.0299(9) -0.0073(9) 0.0098(8) -0.0016(9) 
C16A 0.0276(9) 0.0314(10) 0.0311(9) -0.0057(8) 0.0088(7) -0.0025(8) 
C7A 0.0361(11) 0.0706(18) 0.0470(13) -0.0069(13) 0.0203(10) -0.0192(12) 
  
_geom_special_details 
; 
 All esds (except the esd in the dihedral angle between two l.s. planes) 
 are estimated using the full covariance matrix.  The cell esds are taken 
 into account individually in the estimation of esds in distances, angles 
 and torsion angles; correlations between esds in cell parameters are only 
 used when they are defined by crystal symmetry.  An approximate (isotropic) 
 treatment of cell esds is used for estimating esds involving l.s. planes. 
; 
  
loop_ 
 _geom_bond_atom_site_label_1 
 _geom_bond_atom_site_label_2 
 _geom_bond_distance 
 _geom_bond_site_symmetry_2 
 _geom_bond_publ_flag 
S1 O1 1.4909(18) . ? 
S1 C11 1.790(2) . ? 
S1 C1 1.8089(19) . ? 
S1A O1A 1.5110(14) . ? 
S1A C11A 1.7900(18) . ? 
S1A C1A 1.8173(18) . ? 
O2 C2 1.405(3) . ? 
O2A C2A 1.395(2) . ? 
Cl1 C3 1.773(2) . ? 
Cl2 C3 1.785(2) . ? 
Cl3 C3 1.765(2) . ? 
Cl1A C3A 1.7731(18) . ? 
Cl2A C3A 1.7786(18) . ? 
Cl3A C3A 1.783(2) . ? 
C1 C2 1.524(2) . ? 
C2 C3 1.550(3) . ? 
C11 C16 1.380(3) . ? 
C11 C12 1.388(3) . ? 
C12 C13 1.385(3) . ? 
C13 C14 1.384(3) . ? 
C14 C15 1.377(4) . ? 
C14 C7 1.515(3) . ? 
C15 C16 1.399(3) . ? 
C1A C2A 1.529(2) . ? 
C2A C3A 1.539(2) . ? 
C11A C16A 1.382(3) . ? 
C11A C12A 1.388(3) . ? 
C12A C13A 1.391(3) . ? 
C13A C14A 1.385(3) . ? 
C14A C15A 1.400(3) . ? 
C14A C7A 1.501(3) . ? 
C15A C16A 1.382(3) . ? 
  
loop_ 
 _geom_angle_atom_site_label_1 
 _geom_angle_atom_site_label_2 
 _geom_angle_atom_site_label_3 
 _geom_angle 
 _geom_angle_site_symmetry_1 
 _geom_angle_site_symmetry_3 
 _geom_angle_publ_flag 
O1 S1 C11 106.49(10) . . ? 
O1 S1 C1 105.27(10) . . ? 
C11 S1 C1 96.42(9) . . ? 
O1A S1A C11A 106.16(8) . . ? 
O1A S1A C1A 104.69(9) . . ? 
C11A S1A C1A 96.17(8) . . ? 
C2 C1 S1 108.70(13) . . ? 
O2 C2 C1 107.73(16) . . ? 
O2 C2 C3 110.62(16) . . ? 
C1 C2 C3 110.77(16) . . ? 
C2 C3 Cl3 109.68(14) . . ? 
C2 C3 Cl1 112.03(14) . . ? 
Cl3 C3 Cl1 109.12(11) . . ? 
C2 C3 Cl2 109.02(13) . . ? 
Cl3 C3 Cl2 109.00(11) . . ? 
Cl1 C3 Cl2 107.93(11) . . ? 
C16 C11 C12 121.27(19) . . ? 
C16 C11 S1 118.85(17) . . ? 
C12 C11 S1 119.87(15) . . ? 
C13 C12 C11 118.4(2) . . ? 
C14 C13 C12 121.8(2) . . ? 
C15 C14 C13 118.8(2) . . ? 
C15 C14 C7 120.6(2) . . ? 
C13 C14 C7 120.6(2) . . ? 
C14 C15 C16 121.0(2) . . ? 
C11 C16 C15 118.8(2) . . ? 
C2A C1A S1A 108.25(12) . . ? 
O2A C2A C1A 112.75(15) . . ? 
O2A C2A C3A 112.65(13) . . ? 
C1A C2A C3A 110.73(14) . . ? 
C2A C3A Cl1A 109.73(12) . . ? 
C2A C3A Cl2A 110.08(13) . . ? 
Cl1A C3A Cl2A 108.35(10) . . ? 
C2A C3A Cl3A 110.96(13) . . ? 
Cl1A C3A Cl3A 108.97(10) . . ? 
Cl2A C3A Cl3A 108.70(9) . . ? 
C16A C11A C12A 121.20(17) . . ? 
C16A C11A S1A 119.76(15) . . ? 
C12A C11A S1A 119.03(14) . . ? 
C11A C12A C13A 118.51(17) . . ? 
C14A C13A C12A 121.55(19) . . ? 
C13A C14A C15A 118.46(17) . . ? 
C13A C14A C7A 120.9(2) . . ? 
C15A C14A C7A 120.64(19) . . ? 
C16A C15A C14A 120.80(19) . . ? 
C15A C16A C11A 119.46(19) . . ? 
  
loop_ 
 _geom_torsion_atom_site_label_1 
 _geom_torsion_atom_site_label_2 
 _geom_torsion_atom_site_label_3 
 _geom_torsion_atom_site_label_4 
 _geom_torsion 
 _geom_torsion_site_symmetry_1 
 _geom_torsion_site_symmetry_2 
 _geom_torsion_site_symmetry_3 
 _geom_torsion_site_symmetry_4 
 _geom_torsion_publ_flag 
O1 S1 C1 C2 71.49(16) . . . . ? 
C11 S1 C1 C2 -179.43(14) . . . . ? 
S1 C1 C2 O2 63.65(17) . . . . ? 
S1 C1 C2 C3 -175.25(14) . . . . ? 
O2 C2 C3 Cl3 -177.62(12) . . . . ? 
C1 C2 C3 Cl3 63.00(18) . . . . ? 
O2 C2 C3 Cl1 61.05(18) . . . . ? 
C1 C2 C3 Cl1 -58.3(2) . . . . ? 
O2 C2 C3 Cl2 -58.34(18) . . . . ? 
C1 C2 C3 Cl2 -177.72(13) . . . . ? 
O1 S1 C11 C16 -170.03(16) . . . . ? 
C1 S1 C11 C16 81.93(17) . . . . ? 
O1 S1 C11 C12 8.81(19) . . . . ? 
C1 S1 C11 C12 -99.24(17) . . . . ? 
C16 C11 C12 C13 -0.7(3) . . . . ? 
S1 C11 C12 C13 -179.52(15) . . . . ? 
C11 C12 C13 C14 -1.0(3) . . . . ? 
C12 C13 C14 C15 1.6(3) . . . . ? 
C12 C13 C14 C7 -177.2(2) . . . . ? 
C13 C14 C15 C16 -0.7(3) . . . . ? 
C7 C14 C15 C16 178.2(2) . . . . ? 
C12 C11 C16 C15 1.6(3) . . . . ? 
S1 C11 C16 C15 -179.54(15) . . . . ? 
C14 C15 C16 C11 -0.9(3) . . . . ? 
O1A S1A C1A C2A 52.35(14) . . . . ? 
C11A S1A C1A C2A 160.87(13) . . . . ? 
S1A C1A C2A O2A 54.00(17) . . . . ? 
S1A C1A C2A C3A -178.76(12) . . . . ? 
O2A C2A C3A Cl1A -169.51(13) . . . . ? 
C1A C2A C3A Cl1A 63.20(18) . . . . ? 
O2A C2A C3A Cl2A -50.35(18) . . . . ? 
C1A C2A C3A Cl2A -177.64(12) . . . . ? 
O2A C2A C3A Cl3A 70.01(16) . . . . ? 
C1A C2A C3A Cl3A -57.28(16) . . . . ? 
O1A S1A C11A C16A 20.94(17) . . . . ? 
C1A S1A C11A C16A -86.33(16) . . . . ? 
O1A S1A C11A C12A -159.19(14) . . . . ? 
C1A S1A C11A C12A 93.54(15) . . . . ? 
C16A C11A C12A C13A 1.8(3) . . . . ? 
S1A C11A C12A C13A -178.03(13) . . . . ? 
C11A C12A C13A C14A -0.7(3) . . . . ? 
C12A C13A C14A C15A -0.6(3) . . . . ? 
C12A C13A C14A C7A 179.84(18) . . . . ? 
C13A C14A C15A C16A 0.8(3) . . . . ? 
C7A C14A C15A C16A -179.68(19) . . . . ? 
C14A C15A C16A C11A 0.3(3) . . . . ? 
C12A C11A C16A C15A -1.7(3) . . . . ? 
S1A C11A C16A C15A 178.17(14) . . . . ? 
H2A O2A C1A H1C -4.2 . . . . ? 
H2 O2 C1 H1A -174.9 . . . . ? 
H2A O2A C2A H2B 6.8 . . . . ? 
O1A S1A C2A O2A 98.66(11) . . . . ? 
C11A S1A C2A O2A -155.55(11) . . . . ? 
H2A O2A S1A O1A 173.4 . . . . ? 
H2 O2 C2 H2B -23.2 . . . . ? 
O1 S1 C2 O2 125.05(13) . . . . ? 
C11 S1 C2 O2 -120.64(13) . . . . ? 
H2 O2 S1 O1 41.5 . . . . ? 
  
loop_ 
 _geom_hbond_atom_site_label_D 
 _geom_hbond_atom_site_label_H 
 _geom_hbond_atom_site_label_A 
 _geom_hbond_distance_DH 
 _geom_hbond_distance_HA 
 _geom_hbond_distance_DA 
 _geom_hbond_angle_DHA 
 _geom_hbond_site_symmetry_A 
O2 H2 O1  0.84 1.85 2.676(2) 166.2 2_656 
O2A H2A O1A  0.84 1.89 2.6348(18) 146.9 2_657 
O2A H2A S1A  0.84 2.93 3.7627(15) 173.9 2_657 
C1A H1C O2A  0.99 2.65 3.306(2) 124.2 2_657 
C12A H12A Cl2A  0.95 3.09 3.842(2) 137.6 2_657 
C12A H12A O2A  0.95 2.69 3.460(2) 138.7 2_657 
C1 H1B Cl1A  0.99 2.93 3.705(2) 136.0 . 
C7 H7A Cl2A  0.98 3.24 4.077(3) 144.6 . 
C1 H1A Cl1A  0.99 3.01 3.747(2) 132.4 1_565 
C16 H16 Cl1A  0.95 3.25 4.097(2) 149.6 1_565 
C16A H16A Cl1  0.95 2.90 3.756(2) 150.8 1_545 
C7 H7C Cl3  0.98 3.08 3.928(3) 145.2 1_455 
C7A H7F S1A  0.98 3.03 3.905(3) 148.7 2_757 
C7A H7F O1A  0.98 3.00 3.969(3) 169.6 2_757 
  
_diffrn_measured_fraction_theta_max    0.988 
_diffrn_reflns_theta_full              30.02 
_diffrn_measured_fraction_theta_full   0.988 
_refine_diff_density_max    0.313 
_refine_diff_density_min   -0.248 
_refine_diff_density_rms    0.050 

#===END

  
  
data_mms09_6a
  
_audit_creation_method            SHELXL-97 
_chemical_name_systematic 
; 
 ? 
; 
_chemical_name_common             ? 
_chemical_melting_point           ? 
_chemical_formula_moiety          ? 
_chemical_formula_sum 
 'C12 H18 O2 S' 
_chemical_formula_weight          226.32 
_chemical_absolute_configuration  ad  
  
loop_ 
 _atom_type_symbol 
 _atom_type_description 
 _atom_type_scat_dispersion_real 
 _atom_type_scat_dispersion_imag 
 _atom_type_scat_source 
 'C'  'C'   0.0033   0.0016 
 'International Tables Vol C Tables 4.2.6.8 and 6.1.1.4' 
 'H'  'H'   0.0000   0.0000 
 'International Tables Vol C Tables 4.2.6.8 and 6.1.1.4' 
 'O'  'O'   0.0106   0.0060 
 'International Tables Vol C Tables 4.2.6.8 and 6.1.1.4' 
 'S'  'S'   0.1246   0.1234 
 'International Tables Vol C Tables 4.2.6.8 and 6.1.1.4' 
  
_symmetry_cell_setting            monoclinic 
_symmetry_space_group_name_H-M    P2(1) 
  
loop_ 
 _symmetry_equiv_pos_as_xyz 
 'x, y, z' 
 '-x, y+1/2, -z' 
  
_cell_length_a                    9.3954(19) 
_cell_length_b                    5.3324(11) 
_cell_length_c                    12.688(3) 
_cell_angle_alpha                 90.00 
_cell_angle_beta                  105.36(3) 
_cell_angle_gamma                 90.00 
_cell_volume                      613.0(2) 
_cell_formula_units_Z             2 
_cell_measurement_temperature     173(2) 
_cell_measurement_reflns_used     3031 
_cell_measurement_theta_min       0.998 
_cell_measurement_theta_max       30.034 
  
_exptl_crystal_description        needle 
_exptl_crystal_colour             colourless 
_exptl_crystal_size_max           0.38 
_exptl_crystal_size_mid           0.06 
_exptl_crystal_size_min           0.06 
_exptl_crystal_density_meas       ? 
_exptl_crystal_density_diffrn     1.226 
_exptl_crystal_density_method     'not measured' 
_exptl_crystal_F_000              244 
_exptl_absorpt_coefficient_mu     0.243 
_exptl_absorpt_correction_type    none 
_exptl_absorpt_correction_T_min   ? 
_exptl_absorpt_correction_T_max   ? 
_exptl_absorpt_process_details    ? 
  
_exptl_special_details 
; 
 ? 
; 
  
_diffrn_ambient_temperature       173(2) 
_diffrn_radiation_wavelength      0.71073 
_diffrn_radiation_type            MoK\a 
_diffrn_radiation_source          'fine-focus sealed tube' 
_diffrn_radiation_monochromator   graphite 
_diffrn_measurement_device_type   KappaCCD 
_diffrn_measurement_method        \w-scans 
_diffrn_detector_area_resol_mean  9 
_diffrn_standards_number          ? 
_diffrn_standards_interval_count  ? 
_diffrn_standards_interval_time   ? 
_diffrn_standards_decay_%         ? 
_diffrn_reflns_number             5780 
_diffrn_reflns_av_R_equivalents   0.0880 
_diffrn_reflns_av_sigmaI/netI     0.1263 
_diffrn_reflns_limit_h_min        -12 
_diffrn_reflns_limit_h_max        12 
_diffrn_reflns_limit_k_min        -7 
_diffrn_reflns_limit_k_max        7 
_diffrn_reflns_limit_l_min        -16 
_diffrn_reflns_limit_l_max        16 
_diffrn_reflns_theta_min          5.18 
_diffrn_reflns_theta_max          28.27 
_reflns_number_total              2993 
_reflns_number_gt                 1747 
_reflns_threshold_expression      >2sigma(I) 
  
_computing_data_collection        'Collect (Nonius BV, 1997-2000)' 
_computing_cell_refinement        'HKL Scalepack (Otwinowski & Minor 1997)' 
_computing_data_reduction         'HKL Denzo&Scalepack (Otwinowski&Minor 1997)' 
_computing_structure_solution     'SHELXS-97 (Sheldrick, 1990)' 
_computing_structure_refinement   'SHELXL-97 (Sheldrick, 1997)' 
_computing_molecular_graphics     'SHELXTL v6.14, Bruker AXS 2000-2003' 
_computing_publication_material   'Bruker SHELXTL' 
  
_refine_special_details 
; 
 Refinement of F^2^ against ALL reflections.  The weighted R-factor wR and 
 goodness of fit S are based on F^2^, conventional R-factors R are based 
 on F, with F set to zero for negative F^2^. The threshold expression of 
 F^2^ > 2sigma(F^2^) is used only for calculating R-factors(gt) etc. and is 
 not relevant to the choice of reflections for refinement.  R-factors based 
 on F^2^ are statistically about twice as large as those based on F, and R- 
 factors based on ALL data will be even larger. 
; 
  
_refine_ls_structure_factor_coef  Fsqd 
_refine_ls_matrix_type            full 
_refine_ls_weighting_scheme       calc 
_refine_ls_weighting_details 
 'calc w=1/[\s^2^(Fo^2^)+(0.0420P)^2^+0.0000P] where P=(Fo^2^+2Fc^2^)/3' 
_atom_sites_solution_primary      direct 
_atom_sites_solution_secondary    difmap 
_atom_sites_solution_hydrogens    geom 
_refine_ls_hydrogen_treatment     constr 
_refine_ls_extinction_method      none 
_refine_ls_extinction_coef        ? 
_refine_ls_abs_structure_details 
 'Flack H D (1983), Acta Cryst. A39, 876-881' 
_refine_ls_abs_structure_Flack    -0.19(10) 
_refine_ls_number_reflns          2993 
_refine_ls_number_parameters      140 
_refine_ls_number_restraints      1 
_refine_ls_R_factor_all           0.1295 
_refine_ls_R_factor_gt            0.0597 
_refine_ls_wR_factor_ref          0.1177 
_refine_ls_wR_factor_gt           0.1008 
_refine_ls_goodness_of_fit_ref    1.002 
_refine_ls_restrained_S_all       1.002 
_refine_ls_shift/su_max           0.000 
_refine_ls_shift/su_mean          0.000 
  
loop_ 
 _atom_site_label 
 _atom_site_type_symbol 
 _atom_site_fract_x 
 _atom_site_fract_y 
 _atom_site_fract_z 
 _atom_site_U_iso_or_equiv 
 _atom_site_adp_type 
 _atom_site_occupancy 
 _atom_site_symmetry_multiplicity 
 _atom_site_calc_flag 
 _atom_site_refinement_flags 
 _atom_site_disorder_assembly 
 _atom_site_disorder_group 
S1 S 0.90648(9) 0.12710(17) 0.67856(6) 0.0460(2) Uani 1 1 d . . . 
O1 O 1.0544(2) 0.2275(5) 0.67599(17) 0.0590(7) Uani 1 1 d . . . 
O2 O 0.7907(2) -0.0957(4) 0.46309(17) 0.0498(6) Uani 1 1 d . . . 
H2 H 0.8357 -0.1528 0.4193 0.075 Uiso 1 1 calc R . . 
C1 C 0.7710(3) 0.2660(7) 0.5655(2) 0.0464(8) Uani 1 1 d . . . 
H1A H 0.6709 0.2266 0.5723 0.056 Uiso 1 1 calc R . . 
H1B H 0.7829 0.4505 0.5683 0.056 Uiso 1 1 calc R . . 
C2 C 0.7862(3) 0.1703(6) 0.4562(2) 0.0420(8) Uani 1 1 d . . . 
H2A H 0.8813 0.2325 0.4446 0.050 Uiso 1 1 calc R . . 
C3 C 0.6578(3) 0.2646(6) 0.3627(3) 0.0459(8) Uani 1 1 d . . . 
H3 H 0.6534 0.4514 0.3682 0.055 Uiso 1 1 calc R . . 
C4 C 0.6854(4) 0.1992(6) 0.2519(3) 0.0557(10) Uani 1 1 d . . . 
H4A H 0.6958 0.0172 0.2466 0.084 Uiso 1 1 calc R . . 
H4B H 0.7760 0.2817 0.2457 0.084 Uiso 1 1 calc R . . 
H4C H 0.6019 0.2570 0.1929 0.084 Uiso 1 1 calc R . . 
C5 C 0.5099(3) 0.1586(8) 0.3700(3) 0.0546(10) Uani 1 1 d . . . 
H5A H 0.5148 -0.0250 0.3718 0.082 Uiso 1 1 calc R . . 
H5B H 0.4320 0.2126 0.3062 0.082 Uiso 1 1 calc R . . 
H5C H 0.4878 0.2200 0.4367 0.082 Uiso 1 1 calc R . . 
C11 C 0.8529(3) 0.3007(6) 0.7833(2) 0.0396(7) Uani 1 1 d . . . 
C12 C 0.7334(3) 0.2158(6) 0.8199(3) 0.0479(8) Uani 1 1 d . . . 
H12 H 0.6811 0.0686 0.7899 0.057 Uiso 1 1 calc R . . 
C13 C 0.6929(3) 0.3497(6) 0.9003(3) 0.0508(9) Uani 1 1 d . . . 
H13 H 0.6113 0.2931 0.9249 0.061 Uiso 1 1 calc R . . 
C14 C 0.7662(3) 0.5616(6) 0.9460(2) 0.0443(8) Uani 1 1 d . . . 
C15 C 0.8865(3) 0.6410(7) 0.9085(2) 0.0472(7) Uani 1 1 d . . . 
H15 H 0.9403 0.7861 0.9393 0.057 Uiso 1 1 calc R . . 
C16 C 0.9275(4) 0.5100(6) 0.8272(3) 0.0466(8) Uani 1 1 d . . . 
H16 H 1.0084 0.5669 0.8020 0.056 Uiso 1 1 calc R . . 
C7 C 0.7186(4) 0.7044(7) 1.0338(3) 0.0591(11) Uani 1 1 d . . . 
H7A H 0.6157 0.6637 1.0301 0.089 Uiso 1 1 calc R . . 
H7B H 0.7277 0.8849 1.0226 0.089 Uiso 1 1 calc R . . 
H7C H 0.7816 0.6571 1.1057 0.089 Uiso 1 1 calc R . . 
  
loop_ 
 _atom_site_aniso_label 
 _atom_site_aniso_U_11 
 _atom_site_aniso_U_22 
 _atom_site_aniso_U_33 
 _atom_site_aniso_U_23 
 _atom_site_aniso_U_13 
 _atom_site_aniso_U_12 
S1 0.0527(5) 0.0468(5) 0.0426(4) 0.0044(4) 0.0198(3) 0.0082(4) 
O1 0.0503(13) 0.0844(18) 0.0483(13) 0.0061(12) 0.0232(11) 0.0074(12) 
O2 0.0699(17) 0.0422(14) 0.0453(14) 0.0008(10) 0.0297(12) 0.0056(11) 
C1 0.0530(19) 0.0393(18) 0.0495(18) -0.0011(15) 0.0182(15) 0.0063(16) 
C2 0.0484(17) 0.039(2) 0.0431(16) 0.0002(14) 0.0208(14) -0.0035(14) 
C3 0.0486(19) 0.0378(18) 0.0500(19) 0.0008(16) 0.0107(15) -0.0049(16) 
C4 0.0557(19) 0.067(3) 0.0447(17) 0.0053(17) 0.0130(15) -0.0042(17) 
C5 0.0525(19) 0.056(3) 0.0561(19) 0.002(2) 0.0150(16) -0.0021(19) 
C11 0.0454(18) 0.0388(18) 0.0376(17) 0.0092(14) 0.0163(14) 0.0098(15) 
C12 0.0493(18) 0.046(2) 0.0540(19) 0.0025(15) 0.0228(16) -0.0032(15) 
C13 0.046(2) 0.057(2) 0.055(2) 0.0063(18) 0.0250(17) 0.0011(17) 
C14 0.0455(18) 0.051(2) 0.0394(17) 0.0056(15) 0.0161(14) 0.0095(16) 
C15 0.0499(17) 0.0458(18) 0.0445(16) -0.0028(18) 0.0101(14) -0.0020(18) 
C16 0.049(2) 0.0501(19) 0.0458(19) 0.0034(16) 0.0223(16) 0.0038(16) 
C7 0.059(2) 0.074(3) 0.051(2) -0.0018(17) 0.0256(17) 0.0108(18) 
  
_geom_special_details 
; 
 All esds (except the esd in the dihedral angle between two l.s. planes) 
 are estimated using the full covariance matrix.  The cell esds are taken 
 into account individually in the estimation of esds in distances, angles 
 and torsion angles; correlations between esds in cell parameters are only 
 used when they are defined by crystal symmetry.  An approximate (isotropic) 
 treatment of cell esds is used for estimating esds involving l.s. planes. 
; 
  
loop_ 
 _geom_bond_atom_site_label_1 
 _geom_bond_atom_site_label_2 
 _geom_bond_distance 
 _geom_bond_site_symmetry_2 
 _geom_bond_publ_flag 
S1 O1 1.498(2) . ? 
S1 C11 1.797(3) . ? 
S1 C1 1.806(3) . ? 
O2 C2 1.421(4) . ? 
C1 C2 1.519(4) . ? 
C2 C3 1.537(4) . ? 
C3 C5 1.525(4) . ? 
C3 C4 1.535(4) . ? 
C11 C16 1.357(4) . ? 
C11 C12 1.399(4) . ? 
C12 C13 1.380(4) . ? 
C13 C14 1.369(5) . ? 
C14 C15 1.403(4) . ? 
C14 C7 1.512(4) . ? 
C15 C16 1.382(4) . ? 
  
loop_ 
 _geom_angle_atom_site_label_1 
 _geom_angle_atom_site_label_2 
 _geom_angle_atom_site_label_3 
 _geom_angle 
 _geom_angle_site_symmetry_1 
 _geom_angle_site_symmetry_3 
 _geom_angle_publ_flag 
O1 S1 C11 105.97(15) . . ? 
O1 S1 C1 107.39(15) . . ? 
C11 S1 C1 95.72(14) . . ? 
C2 C1 S1 111.8(2) . . ? 
O2 C2 C1 106.7(2) . . ? 
O2 C2 C3 112.2(3) . . ? 
C1 C2 C3 110.5(2) . . ? 
C5 C3 C4 110.4(3) . . ? 
C5 C3 C2 111.9(3) . . ? 
C4 C3 C2 110.1(3) . . ? 
C16 C11 C12 120.2(3) . . ? 
C16 C11 S1 120.8(2) . . ? 
C12 C11 S1 119.0(3) . . ? 
C13 C12 C11 118.7(3) . . ? 
C14 C13 C12 122.3(3) . . ? 
C13 C14 C15 117.7(3) . . ? 
C13 C14 C7 120.9(3) . . ? 
C15 C14 C7 121.3(3) . . ? 
C16 C15 C14 120.6(3) . . ? 
C11 C16 C15 120.4(3) . . ? 
  
loop_ 
 _geom_torsion_atom_site_label_1 
 _geom_torsion_atom_site_label_2 
 _geom_torsion_atom_site_label_3 
 _geom_torsion_atom_site_label_4 
 _geom_torsion 
 _geom_torsion_site_symmetry_1 
 _geom_torsion_site_symmetry_2 
 _geom_torsion_site_symmetry_3 
 _geom_torsion_site_symmetry_4 
 _geom_torsion_publ_flag 
O1 S1 C1 C2 68.6(2) . . . . ? 
C11 S1 C1 C2 177.4(2) . . . . ? 
S1 C1 C2 O2 50.3(3) . . . . ? 
S1 C1 C2 C3 172.6(2) . . . . ? 
O2 C2 C3 C5 54.2(3) . . . . ? 
C1 C2 C3 C5 -64.8(3) . . . . ? 
O2 C2 C3 C4 -69.1(3) . . . . ? 
C1 C2 C3 C4 171.9(2) . . . . ? 
O1 S1 C11 C16 12.1(3) . . . . ? 
C1 S1 C11 C16 -97.9(3) . . . . ? 
O1 S1 C11 C12 -167.3(2) . . . . ? 
C1 S1 C11 C12 82.7(3) . . . . ? 
C16 C11 C12 C13 0.5(5) . . . . ? 
S1 C11 C12 C13 179.9(2) . . . . ? 
C11 C12 C13 C14 -0.5(5) . . . . ? 
C12 C13 C14 C15 -0.2(5) . . . . ? 
C12 C13 C14 C7 179.8(3) . . . . ? 
C13 C14 C15 C16 0.8(5) . . . . ? 
C7 C14 C15 C16 -179.2(3) . . . . ? 
C12 C11 C16 C15 0.1(5) . . . . ? 
S1 C11 C16 C15 -179.3(2) . . . . ? 
C14 C15 C16 C11 -0.7(5) . . . . ? 
H2 O2 C1 H1A 157.5 . . . . ? 
H2 O2 S1 O1 25.3 . . . . ? 
H2 O2 C2 H2A -36.9 . . . . ? 
C11 S1 C2 O2 -135.09(18) . . . . ? 
O1 S1 C2 O2 111.23(17) . . . . ? 
  
loop_ 
 _geom_hbond_atom_site_label_D 
 _geom_hbond_atom_site_label_H 
 _geom_hbond_atom_site_label_A 
 _geom_hbond_distance_DH 
 _geom_hbond_distance_HA 
 _geom_hbond_distance_DA 
 _geom_hbond_angle_DHA 
 _geom_hbond_site_symmetry_A 
C7 H7C O1  0.98 2.82 3.737(4) 156.9 2_757 
C3 H3 O2  1.00 2.85 3.738(4) 148.3 1_565 
C1 H1B O2  0.99 2.77 3.665(4) 150.1 1_565 
C4 H4A O1  0.98 2.76 3.458(4) 128.3 2_746 
O2 H2 O1  0.84 1.90 2.735(3) 177.2 2_746 
  
_diffrn_measured_fraction_theta_max    0.988 
_diffrn_reflns_theta_full              28.27 
_diffrn_measured_fraction_theta_full   0.988 
_refine_diff_density_max    0.260 
_refine_diff_density_min   -0.222 
_refine_diff_density_rms    0.048 

#===END

  
data_mms11_1b
  
_audit_creation_method            SHELXL-97 
_chemical_name_systematic 
; 
 ? 
; 
_chemical_name_common             ? 
_chemical_melting_point           ? 
_chemical_formula_moiety          ? 
_chemical_formula_sum 
 'C10 H13 F O2 S' 
_chemical_formula_weight          216.26 
_chemical_absolute_configuration  ad

  
loop_ 
 _atom_type_symbol 
 _atom_type_description 
 _atom_type_scat_dispersion_real 
 _atom_type_scat_dispersion_imag 
 _atom_type_scat_source 
 'C'  'C'   0.0033   0.0016 
 'International Tables Vol C Tables 4.2.6.8 and 6.1.1.4' 
 'H'  'H'   0.0000   0.0000 
 'International Tables Vol C Tables 4.2.6.8 and 6.1.1.4' 
 'O'  'O'   0.0106   0.0060 
 'International Tables Vol C Tables 4.2.6.8 and 6.1.1.4' 
 'F'  'F'   0.0171   0.0103 
 'International Tables Vol C Tables 4.2.6.8 and 6.1.1.4' 
 'S'  'S'   0.1246   0.1234 
 'International Tables Vol C Tables 4.2.6.8 and 6.1.1.4' 
  
_symmetry_cell_setting            orthorhombic 
_symmetry_space_group_name_H-M    P2(1)2(1)2(1) 
  
loop_ 
 _symmetry_equiv_pos_as_xyz 
 'x, y, z' 
 '-x+1/2, -y, z+1/2' 
 '-x, y+1/2, -z+1/2' 
 'x+1/2, -y+1/2, -z' 
  
_cell_length_a                    5.6382(11) 
_cell_length_b                    8.4542(17) 
_cell_length_c                    21.822(4) 
_cell_angle_alpha                 90.00 
_cell_angle_beta                  90.00 
_cell_angle_gamma                 90.00 
_cell_volume                      1040.2(4) 
_cell_formula_units_Z             4 
_cell_measurement_temperature     173(2) 
_cell_measurement_reflns_used     4488 
_cell_measurement_theta_min       0.998 
_cell_measurement_theta_max       30.034 
  
_exptl_crystal_description        lath 
_exptl_crystal_colour             colourless 
_exptl_crystal_size_max           0.40 
_exptl_crystal_size_mid           0.18 
_exptl_crystal_size_min           0.08 
_exptl_crystal_density_meas       ? 
_exptl_crystal_density_diffrn     1.381 
_exptl_crystal_density_method     'not measured' 
_exptl_crystal_F_000              456 
_exptl_absorpt_coefficient_mu     0.297 
_exptl_absorpt_correction_type    none 
_exptl_absorpt_correction_T_min   ? 
_exptl_absorpt_correction_T_max   ? 
_exptl_absorpt_process_details    ? 
  
_exptl_special_details 
; 
 ? 
; 
  
_diffrn_ambient_temperature       173(2) 
_diffrn_radiation_wavelength      0.71073 
_diffrn_radiation_type            MoK\a 
_diffrn_radiation_source          'fine-focus sealed tube' 
_diffrn_radiation_monochromator   graphite 
_diffrn_measurement_device_type   KappaCCD 
_diffrn_measurement_method        \w-scans 
_diffrn_detector_area_resol_mean  9 
_diffrn_standards_number          ? 
_diffrn_standards_interval_count  ? 
_diffrn_standards_interval_time   ? 
_diffrn_standards_decay_%         ? 
_diffrn_reflns_number             7846 
_diffrn_reflns_av_R_equivalents   0.0843 
_diffrn_reflns_av_sigmaI/netI     0.1163 
_diffrn_reflns_limit_h_min        -7 
_diffrn_reflns_limit_h_max        6 
_diffrn_reflns_limit_k_min        -10 
_diffrn_reflns_limit_k_max        11 
_diffrn_reflns_limit_l_min        -29 
_diffrn_reflns_limit_l_max        29 
_diffrn_reflns_theta_min          4.34 
_diffrn_reflns_theta_max          28.27 
_reflns_number_total              2579 
_reflns_number_gt                 1370 
_reflns_threshold_expression      >2sigma(I) 
  
_computing_data_collection        'Collect (Nonius BV, 1997-2000)' 
_computing_cell_refinement        'HKL Denzo (Otwinowski & Minor 1997)' 
_computing_data_reduction         'HKL Scalepack (Otwinowski & Minor 1997)' 
_computing_structure_solution     'SHELXS-97 (Sheldrick, 1990)' 
_computing_structure_refinement   'SHELXL-97 (Sheldrick, 1997)' 
_computing_molecular_graphics     'SHELXTL v6.14 (Bruker AXS, 2000-2003)' 
_computing_publication_material   'SHELXL-97 (Sheldrick, 1997)' 
  
_refine_special_details 
; 
 Refinement of F^2^ against ALL reflections.  The weighted R-factor wR and 
 goodness of fit S are based on F^2^, conventional R-factors R are based 
 on F, with F set to zero for negative F^2^. The threshold expression of 
 F^2^ > 2sigma(F^2^) is used only for calculating R-factors(gt) etc. and is 
 not relevant to the choice of reflections for refinement.  R-factors based 
 on F^2^ are statistically about twice as large as those based on F, and R- 
 factors based on ALL data will be even larger. 
; 
  
_refine_ls_structure_factor_coef  Fsqd 
_refine_ls_matrix_type            full 
_refine_ls_weighting_scheme       calc 
_refine_ls_weighting_details 
 'calc w=1/[\s^2^(Fo^2^)+(0.0240P)^2^+0.0000P] where P=(Fo^2^+2Fc^2^)/3' 
_atom_sites_solution_primary      direct 
_atom_sites_solution_secondary    difmap 
_atom_sites_solution_hydrogens    geom 
_refine_ls_hydrogen_treatment     constr 
_refine_ls_extinction_method      none 
_refine_ls_extinction_coef        ? 
_refine_ls_abs_structure_details 
 'Flack H D (1983), Acta Cryst. A39, 876-881' 
_refine_ls_abs_structure_Flack    0.04(9) 
_refine_ls_number_reflns          2579 
_refine_ls_number_parameters      129 
_refine_ls_number_restraints      0 
_refine_ls_R_factor_all           0.1314 
_refine_ls_R_factor_gt            0.0463 
_refine_ls_wR_factor_ref          0.0743 
_refine_ls_wR_factor_gt           0.0658 
_refine_ls_goodness_of_fit_ref    1.008 
_refine_ls_restrained_S_all       1.008 
_refine_ls_shift/su_max           0.000 
_refine_ls_shift/su_mean          0.000 
  
loop_ 
 _atom_site_label 
 _atom_site_type_symbol 
 _atom_site_fract_x 
 _atom_site_fract_y 
 _atom_site_fract_z 
 _atom_site_U_iso_or_equiv 
 _atom_site_adp_type 
 _atom_site_occupancy 
 _atom_site_symmetry_multiplicity 
 _atom_site_calc_flag 
 _atom_site_refinement_flags 
 _atom_site_disorder_assembly 
 _atom_site_disorder_group 
S1 S 0.82292(11) 0.70968(7) 0.31733(3) 0.0532(2) Uani 1 1 d . . . 
F1 F 0.7588(2) 0.74658(16) 0.10411(6) 0.0714(5) Uani 1 1 d . . . 
O1 O 0.7066(3) 0.86489(16) 0.30043(7) 0.0629(5) Uani 1 1 d . . . 
O2 O 1.0644(3) 0.64893(16) 0.19963(8) 0.0553(5) Uani 1 1 d . . . 
H2 H 1.1457 0.5658 0.1977 0.083 Uiso 1 1 calc R . . 
C1 C 0.7215(4) 0.5718(3) 0.26020(10) 0.0509(6) Uani 1 1 d . . . 
H1A H 0.7711 0.4636 0.2720 0.061 Uiso 1 1 calc R . . 
H1B H 0.5461 0.5738 0.2587 0.061 Uiso 1 1 calc R . . 
C2 C 0.8193(4) 0.6098(3) 0.19699(10) 0.0523(6) Uani 1 1 d . . . 
H2A H 0.8017 0.5134 0.1709 0.063 Uiso 1 1 calc R . . 
C3 C 0.6929(4) 0.7421(3) 0.16624(10) 0.0634(7) Uani 1 1 d . . . 
H3A H 0.5194 0.7267 0.1698 0.076 Uiso 1 1 calc R . . 
H3B H 0.7344 0.8435 0.1862 0.076 Uiso 1 1 calc R . . 
C11 C 0.6595(4) 0.6329(3) 0.38101(10) 0.0451(6) Uani 1 1 d . . . 
C12 C 0.4473(4) 0.6999(3) 0.39751(12) 0.0542(6) Uani 1 1 d . . . 
H12 H 0.3802 0.7815 0.3731 0.065 Uiso 1 1 calc R . . 
C13 C 0.3316(5) 0.6486(3) 0.44942(11) 0.0538(6) Uani 1 1 d . . . 
H13 H 0.1860 0.6968 0.4609 0.065 Uiso 1 1 calc R . . 
C14 C 0.4236(4) 0.5284(3) 0.48503(11) 0.0466(6) Uani 1 1 d . . . 
C15 C 0.6379(5) 0.4612(3) 0.46717(12) 0.0510(7) Uani 1 1 d . . . 
H15 H 0.7039 0.3782 0.4911 0.061 Uiso 1 1 calc R . . 
C16 C 0.7563(4) 0.5119(3) 0.41590(12) 0.0502(7) Uani 1 1 d . . . 
H16 H 0.9026 0.4648 0.4044 0.060 Uiso 1 1 calc R . . 
C7 C 0.2959(5) 0.4729(3) 0.54152(11) 0.0637(7) Uani 1 1 d . . . 
H7A H 0.3009 0.5561 0.5728 0.095 Uiso 1 1 calc R . . 
H7B H 0.3730 0.3774 0.5573 0.095 Uiso 1 1 calc R . . 
H7C H 0.1304 0.4492 0.5313 0.095 Uiso 1 1 calc R . . 
  
loop_ 
 _atom_site_aniso_label 
 _atom_site_aniso_U_11 
 _atom_site_aniso_U_22 
 _atom_site_aniso_U_33 
 _atom_site_aniso_U_23 
 _atom_site_aniso_U_13 
 _atom_site_aniso_U_12 
S1 0.0501(4) 0.0513(3) 0.0583(4) -0.0005(3) -0.0107(3) -0.0075(3) 
F1 0.0738(11) 0.0811(11) 0.0591(8) 0.0096(7) 0.0013(7) 0.0102(7) 
O1 0.0755(12) 0.0408(8) 0.0724(11) 0.0044(8) -0.0091(10) -0.0048(8) 
O2 0.0422(10) 0.0480(9) 0.0758(12) 0.0012(10) -0.0009(9) 0.0004(7) 
C1 0.0509(17) 0.0469(13) 0.0550(15) -0.0029(12) -0.0037(13) -0.0096(13) 
C2 0.0414(15) 0.0511(14) 0.0644(18) 0.0011(12) -0.0023(15) 0.0007(13) 
C3 0.0530(14) 0.0730(18) 0.0643(17) 0.0083(14) 0.0073(14) 0.0015(15) 
C11 0.0423(14) 0.0436(13) 0.0494(14) -0.0031(12) -0.0118(13) -0.0063(13) 
C12 0.0474(16) 0.0459(14) 0.0692(18) 0.0039(15) -0.0140(14) 0.0038(13) 
C13 0.0423(14) 0.0493(14) 0.0699(17) -0.0065(14) -0.0024(15) 0.0069(13) 
C14 0.0501(17) 0.0408(14) 0.0488(15) -0.0118(12) -0.0038(14) -0.0004(12) 
C15 0.0568(18) 0.0444(14) 0.0517(16) -0.0063(13) -0.0080(14) 0.0044(13) 
C16 0.0437(15) 0.0464(14) 0.0605(17) -0.0113(13) -0.0063(15) 0.0080(11) 
C7 0.0658(19) 0.0629(16) 0.0622(16) -0.0067(14) 0.0072(17) 0.0020(14) 
  
_geom_special_details 
; 
 All esds (except the esd in the dihedral angle between two l.s. planes) 
 are estimated using the full covariance matrix.  The cell esds are taken 
 into account individually in the estimation of esds in distances, angles 
 and torsion angles; correlations between esds in cell parameters are only 
 used when they are defined by crystal symmetry.  An approximate (isotropic) 
 treatment of cell esds is used for estimating esds involving l.s. planes. 
; 
  
loop_ 
 _geom_bond_atom_site_label_1 
 _geom_bond_atom_site_label_2 
 _geom_bond_distance 
 _geom_bond_site_symmetry_2 
 _geom_bond_publ_flag 
S1 O1 1.5126(16) . ? 
S1 C11 1.789(2) . ? 
S1 C1 1.800(2) . ? 
F1 C3 1.406(2) . ? 
O2 C2 1.422(3) . ? 
C1 C2 1.520(3) . ? 
C2 C3 1.486(3) . ? 
C11 C12 1.372(3) . ? 
C11 C16 1.387(3) . ? 
C12 C13 1.377(3) . ? 
C13 C14 1.381(3) . ? 
C14 C15 1.391(3) . ? 
C14 C7 1.503(3) . ? 
C15 C16 1.372(3) . ? 
  
loop_ 
 _geom_angle_atom_site_label_1 
 _geom_angle_atom_site_label_2 
 _geom_angle_atom_site_label_3 
 _geom_angle 
 _geom_angle_site_symmetry_1 
 _geom_angle_site_symmetry_3 
 _geom_angle_publ_flag 
O1 S1 C11 106.29(11) . . ? 
O1 S1 C1 104.80(10) . . ? 
C11 S1 C1 98.02(10) . . ? 
C2 C1 S1 112.10(16) . . ? 
O2 C2 C3 108.02(18) . . ? 
O2 C2 C1 111.40(19) . . ? 
C3 C2 C1 113.3(2) . . ? 
F1 C3 C2 109.20(19) . . ? 
C12 C11 C16 120.2(2) . . ? 
C12 C11 S1 120.24(19) . . ? 
C16 C11 S1 119.41(19) . . ? 
C11 C12 C13 120.0(2) . . ? 
C12 C13 C14 121.1(2) . . ? 
C13 C14 C15 118.0(2) . . ? 
C13 C14 C7 120.8(2) . . ? 
C15 C14 C7 121.2(2) . . ? 
C16 C15 C14 121.6(2) . . ? 
C15 C16 C11 119.1(2) . . ? 
  
loop_ 
 _geom_torsion_atom_site_label_1 
 _geom_torsion_atom_site_label_2 
 _geom_torsion_atom_site_label_3 
 _geom_torsion_atom_site_label_4 
 _geom_torsion 
 _geom_torsion_site_symmetry_1 
 _geom_torsion_site_symmetry_2 
 _geom_torsion_site_symmetry_3 
 _geom_torsion_site_symmetry_4 
 _geom_torsion_publ_flag 
O1 S1 C1 C2 67.43(19) . . . . ? 
C11 S1 C1 C2 176.72(18) . . . . ? 
S1 C1 C2 O2 43.6(2) . . . . ? 
S1 C1 C2 C3 -78.4(2) . . . . ? 
O2 C2 C3 F1 68.7(2) . . . . ? 
C1 C2 C3 F1 -167.35(18) . . . . ? 
O1 S1 C11 C12 11.2(2) . . . . ? 
C1 S1 C11 C12 -96.82(19) . . . . ? 
O1 S1 C11 C16 -164.69(16) . . . . ? 
C1 S1 C11 C16 87.25(18) . . . . ? 
C16 C11 C12 C13 1.1(3) . . . . ? 
S1 C11 C12 C13 -174.83(17) . . . . ? 
C11 C12 C13 C14 -1.1(3) . . . . ? 
C12 C13 C14 C15 0.5(3) . . . . ? 
C12 C13 C14 C7 -179.8(2) . . . . ? 
C13 C14 C15 C16 0.1(3) . . . . ? 
C7 C14 C15 C16 -179.6(2) . . . . ? 
C14 C15 C16 C11 -0.1(3) . . . . ? 
C12 C11 C16 C15 -0.5(3) . . . . ? 
S1 C11 C16 C15 175.43(16) . . . . ? 
O1 S1 C2 O2 103.58(12) . . . . ? 
C11 S1 C2 O2 -143.86(13) . . . . ? 
H2 O2 C2 H2A -32.1 . . . . ? 
H2 O2 S1 O1 179.4 . . . . ? 
H2 O2 C1 H1A 6.4 . . . . ? 
  
loop_ 
 _geom_hbond_atom_site_label_D 
 _geom_hbond_atom_site_label_H 
 _geom_hbond_atom_site_label_A 
 _geom_hbond_distance_DH 
 _geom_hbond_distance_HA 
 _geom_hbond_distance_DA 
 _geom_hbond_angle_DHA 
 _geom_hbond_site_symmetry_A 
C3 H3B O1  0.99 2.50 3.108(3) 119.1 . 
O2 H2 O1  0.84 1.89 2.726(2) 171.9 3_745 
C1 H1A O2  0.99 2.88 3.873(3) 176.6 3_745 
C16 H16 F1  0.95 2.66 3.564(3) 158.8 3_745 
C3 H3A O2  0.99 2.73 3.702(3) 168.5 1_455 
C15 H15 F1  0.95 2.69 3.515(3) 145.4 2_665 
C7 H7B F1  0.98 2.54 3.408(3) 147.6 2_665 
  
_diffrn_measured_fraction_theta_max    0.994 
_diffrn_reflns_theta_full              28.27 
_diffrn_measured_fraction_theta_full   0.994 
_refine_diff_density_max    0.164 
_refine_diff_density_min   -0.295 
_refine_diff_density_rms    0.052 

#===END

  
  
data_mms10_2b
  
_audit_creation_method            SHELXL-97 
_chemical_name_systematic 
; 
 ? 
; 
_chemical_name_common             ? 
_chemical_melting_point           ? 
_chemical_formula_moiety          ? 
_chemical_formula_sum 
 'C10 H12 F2 O2 S' 
_chemical_formula_weight          234.26 
_chemical_absolute_configuration  rmad
 
loop_ 
 _atom_type_symbol 
 _atom_type_description 
 _atom_type_scat_dispersion_real 
 _atom_type_scat_dispersion_imag 
 _atom_type_scat_source 
 'C'  'C'   0.0033   0.0016 
 'International Tables Vol C Tables 4.2.6.8 and 6.1.1.4' 
 'H'  'H'   0.0000   0.0000 
 'International Tables Vol C Tables 4.2.6.8 and 6.1.1.4' 
 'O'  'O'   0.0106   0.0060 
 'International Tables Vol C Tables 4.2.6.8 and 6.1.1.4' 
 'F'  'F'   0.0171   0.0103 
 'International Tables Vol C Tables 4.2.6.8 and 6.1.1.4' 
 'S'  'S'   0.1246   0.1234 
 'International Tables Vol C Tables 4.2.6.8 and 6.1.1.4' 
  
_symmetry_cell_setting            monoclinic 
_symmetry_space_group_name_H-M    P2(1) 
  
loop_ 
 _symmetry_equiv_pos_as_xyz 
 'x, y, z' 
 '-x, y+1/2, -z' 
  
_cell_length_a                    4.6869(9) 
_cell_length_b                    10.458(2) 
_cell_length_c                    10.937(2) 
_cell_angle_alpha                 90.00 
_cell_angle_beta                  96.07(3) 
_cell_angle_gamma                 90.00 
_cell_volume                      533.09(18) 
_cell_formula_units_Z             2 
_cell_measurement_temperature     173(2) 
_cell_measurement_reflns_used     2961 
_cell_measurement_theta_min       0.998 
_cell_measurement_theta_max       30.034 
  
_exptl_crystal_description        prism 
_exptl_crystal_colour             colourless 
_exptl_crystal_size_max           0.42 
_exptl_crystal_size_mid           0.38 
_exptl_crystal_size_min           0.16 
_exptl_crystal_density_meas       ? 
_exptl_crystal_density_diffrn     1.459 
_exptl_crystal_density_method     'not measured' 
_exptl_crystal_F_000              244 
_exptl_absorpt_coefficient_mu     0.309 
_exptl_absorpt_correction_type    none 
_exptl_absorpt_correction_T_min   ? 
_exptl_absorpt_correction_T_max   ? 
_exptl_absorpt_process_details    ? 
  
_exptl_special_details 
; 
 ? 
; 
  
_diffrn_ambient_temperature       173(2) 
_diffrn_radiation_wavelength      0.71073 
_diffrn_radiation_type            MoK\a 
_diffrn_radiation_source          'fine-focus sealed tube' 
_diffrn_radiation_monochromator   graphite 
_diffrn_measurement_device_type   KappaCCD 
_diffrn_measurement_method        \w-scans 
_diffrn_detector_area_resol_mean  9 
_diffrn_standards_number          ? 
_diffrn_standards_interval_count  ? 
_diffrn_standards_interval_time   ? 
_diffrn_standards_decay_%         ? 
_diffrn_reflns_number             5842 
_diffrn_reflns_av_R_equivalents   0.0411 
_diffrn_reflns_av_sigmaI/netI     0.0703 
_diffrn_reflns_limit_h_min        -6 
_diffrn_reflns_limit_h_max        6 
_diffrn_reflns_limit_k_min        -14 
_diffrn_reflns_limit_k_max        14 
_diffrn_reflns_limit_l_min        -15 
_diffrn_reflns_limit_l_max        14 
_diffrn_reflns_theta_min          5.31 
_diffrn_reflns_theta_max          30.03 
_reflns_number_total              3090 
_reflns_number_gt                 2168 
_reflns_threshold_expression      >2sigma(I) 
  
_computing_data_collection        'Collect (Nonius BV, 1997-2000)' 
_computing_cell_refinement        'HKL Denzo (Otwinowski & Minor 1997)' 
_computing_data_reduction         'HKL Scalepack (Otwinowski & Minor 1997)' 
_computing_structure_solution     'SHELXS-97 (Sheldrick, 1990)' 
_computing_structure_refinement   'SHELXL-97 (Sheldrick, 1997)' 
_computing_molecular_graphics     'SHELXTL v6.14 (Bruker AXS, 2000-2003)' 
_computing_publication_material   'SHELXS-97 (Sheldrick, 1990)' 
  
_refine_special_details 
; 
 Refinement of F^2^ against ALL reflections.  The weighted R-factor wR and 
 goodness of fit S are based on F^2^, conventional R-factors R are based 
 on F, with F set to zero for negative F^2^. The threshold expression of 
 F^2^ > 2sigma(F^2^) is used only for calculating R-factors(gt) etc. and is 
 not relevant to the choice of reflections for refinement.  R-factors based 
 on F^2^ are statistically about twice as large as those based on F, and R- 
 factors based on ALL data will be even larger. 
; 
  
_refine_ls_structure_factor_coef  Fsqd 
_refine_ls_matrix_type            full 
_refine_ls_weighting_scheme       calc 
_refine_ls_weighting_details 
 'calc w=1/[\s^2^(Fo^2^)+(0.0350P)^2^+0.0000P] where P=(Fo^2^+2Fc^2^)/3' 
_atom_sites_solution_primary      direct 
_atom_sites_solution_secondary    difmap 
_atom_sites_solution_hydrogens    geom 
_refine_ls_hydrogen_treatment     constr 
_refine_ls_extinction_method      none 
_refine_ls_extinction_coef        ? 
_refine_ls_abs_structure_details 
 'Flack H D (1983), Acta Cryst. A39, 876-881' 
_refine_ls_abs_structure_Flack    -0.04(6) 
_refine_ls_number_reflns          3090 
_refine_ls_number_parameters      138 
_refine_ls_number_restraints      1 
_refine_ls_R_factor_all           0.0785 
_refine_ls_R_factor_gt            0.0409 
_refine_ls_wR_factor_ref          0.0779 
_refine_ls_wR_factor_gt           0.0715 
_refine_ls_goodness_of_fit_ref    1.003 
_refine_ls_restrained_S_all       1.003 
_refine_ls_shift/su_max           0.000 
_refine_ls_shift/su_mean          0.000 
  
loop_ 
 _atom_site_label 
 _atom_site_type_symbol 
 _atom_site_fract_x 
 _atom_site_fract_y 
 _atom_site_fract_z 
 _atom_site_U_iso_or_equiv 
 _atom_site_adp_type 
 _atom_site_occupancy 
 _atom_site_symmetry_multiplicity 
 _atom_site_calc_flag 
 _atom_site_refinement_flags 
 _atom_site_disorder_assembly 
 _atom_site_disorder_group 
S1 S 0.78518(9) 0.14414(4) 0.28791(4) 0.03485(13) Uani 1 1 d . . . 
F1 F 0.5189(3) 0.12238(17) 0.61251(13) 0.0701(4) Uani 1 1 d . . . 
F2 F 0.8656(3) 0.24284(12) 0.69647(11) 0.0552(4) Uani 1 1 d . . . 
O1 O 0.8577(4) 0.02799(15) 0.36478(13) 0.0537(4) Uani 1 1 d . . . 
O2 O 0.9431(3) 0.34981(13) 0.46715(13) 0.0416(3) Uani 1 1 d . . . 
H2 H 1.0063 0.3941 0.5282 0.062 Uiso 1 1 calc R . . 
C1 C 0.5429(4) 0.23451(19) 0.37256(17) 0.0347(4) Uani 1 1 d . . . 
H1A H 0.4617 0.3062 0.3209 0.042 Uiso 1 1 calc R . . 
H1B H 0.3821 0.1787 0.3908 0.042 Uiso 1 1 calc R . . 
C2 C 0.6906(4) 0.28753(18) 0.49235(17) 0.0338(4) Uani 1 1 d . . . 
H2A H 0.5607 0.3516 0.5257 0.041 Uiso 1 1 calc R . . 
C3 C 0.7624(5) 0.18462(19) 0.58890(18) 0.0406(5) Uani 1 1 d . . . 
H3 H 0.9063 0.1231 0.5616 0.049 Uiso 1 1 calc R . . 
C11 C 0.5285(4) 0.09581(17) 0.16351(17) 0.0304(4) Uani 1 1 d . . . 
C12 C 0.3719(4) -0.01418(18) 0.17376(17) 0.0374(5) Uani 1 1 d . . . 
H12 H 0.3941 -0.0630 0.2474 0.045 Uiso 1 1 calc R . . 
C13 C 0.1812(4) -0.0527(2) 0.07512(18) 0.0402(5) Uani 1 1 d . . . 
H13 H 0.0688 -0.1273 0.0828 0.048 Uiso 1 1 calc R . . 
C14 C 0.1506(4) 0.01496(19) -0.03463(18) 0.0370(5) Uani 1 1 d . . . 
C15 C 0.3114(4) 0.12581(19) -0.04183(17) 0.0394(5) Uani 1 1 d . . . 
H15 H 0.2908 0.1748 -0.1154 0.047 Uiso 1 1 calc R . . 
C16 C 0.5009(4) 0.16607(19) 0.05600(17) 0.0387(5) Uani 1 1 d . . . 
H16 H 0.6112 0.2415 0.0493 0.046 Uiso 1 1 calc R . . 
C7 C -0.0501(5) -0.0310(2) -0.1422(2) 0.0536(6) Uani 1 1 d . . . 
H7A H -0.2236 0.0219 -0.1502 0.080 Uiso 1 1 calc R . . 
H7B H -0.1023 -0.1203 -0.1289 0.080 Uiso 1 1 calc R . . 
H7C H 0.0450 -0.0246 -0.2176 0.080 Uiso 1 1 calc R . . 
  
loop_ 
 _atom_site_aniso_label 
 _atom_site_aniso_U_11 
 _atom_site_aniso_U_22 
 _atom_site_aniso_U_33 
 _atom_site_aniso_U_23 
 _atom_site_aniso_U_13 
 _atom_site_aniso_U_12 
S1 0.0331(2) 0.0368(2) 0.0332(2) -0.0037(2) -0.00305(16) 0.0067(2) 
F1 0.0652(9) 0.0839(11) 0.0608(9) 0.0204(8) 0.0041(7) -0.0181(8) 
F2 0.0806(9) 0.0474(7) 0.0342(6) -0.0089(6) -0.0104(6) 0.0149(7) 
O1 0.0756(11) 0.0448(8) 0.0369(9) -0.0014(7) -0.0112(8) 0.0271(8) 
O2 0.0466(9) 0.0376(8) 0.0396(8) -0.0094(6) -0.0001(6) -0.0063(6) 
C1 0.0325(10) 0.0343(10) 0.0361(10) -0.0049(8) -0.0015(8) 0.0066(8) 
C2 0.0352(10) 0.0317(10) 0.0339(10) -0.0048(8) 0.0003(8) 0.0055(9) 
C3 0.0461(12) 0.0409(12) 0.0334(11) -0.0039(8) -0.0026(9) -0.0010(9) 
C11 0.0341(10) 0.0300(9) 0.0262(10) -0.0046(7) -0.0007(8) 0.0024(8) 
C12 0.0528(13) 0.0317(10) 0.0278(10) 0.0031(8) 0.0044(9) -0.0028(9) 
C13 0.0460(12) 0.0349(10) 0.0406(11) -0.0057(9) 0.0084(9) -0.0107(9) 
C14 0.0348(11) 0.0362(11) 0.0388(12) -0.0117(9) -0.0011(9) 0.0056(9) 
C15 0.0498(11) 0.0358(12) 0.0310(10) 0.0050(9) -0.0034(8) 0.0058(10) 
C16 0.0446(10) 0.0324(13) 0.0379(11) 0.0043(8) -0.0014(8) -0.0017(9) 
C7 0.0601(14) 0.0493(14) 0.0479(13) -0.0116(11) -0.0104(11) 0.0033(11) 
  
_geom_special_details 
; 
 All esds (except the esd in the dihedral angle between two l.s. planes) 
 are estimated using the full covariance matrix.  The cell esds are taken 
 into account individually in the estimation of esds in distances, angles 
 and torsion angles; correlations between esds in cell parameters are only 
 used when they are defined by crystal symmetry.  An approximate (isotropic) 
 treatment of cell esds is used for estimating esds involving l.s. planes. 
; 
  
loop_ 
 _geom_bond_atom_site_label_1 
 _geom_bond_atom_site_label_2 
 _geom_bond_distance 
 _geom_bond_site_symmetry_2 
 _geom_bond_publ_flag 
S1 O1 1.4958(15) . ? 
S1 C11 1.7911(19) . ? 
S1 C1 1.8063(19) . ? 
F1 C3 1.362(3) . ? 
F2 C3 1.367(2) . ? 
O2 C2 1.403(2) . ? 
C1 C2 1.520(3) . ? 
C2 C3 1.520(3) . ? 
C11 C12 1.375(3) . ? 
C11 C16 1.381(3) . ? 
C12 C13 1.386(3) . ? 
C13 C14 1.388(3) . ? 
C14 C15 1.390(3) . ? 
C14 C7 1.506(3) . ? 
C15 C16 1.382(3) . ? 
  
loop_ 
 _geom_angle_atom_site_label_1 
 _geom_angle_atom_site_label_2 
 _geom_angle_atom_site_label_3 
 _geom_angle 
 _geom_angle_site_symmetry_1 
 _geom_angle_site_symmetry_3 
 _geom_angle_publ_flag 
O1 S1 C11 106.99(10) . . ? 
O1 S1 C1 104.75(9) . . ? 
C11 S1 C1 97.40(9) . . ? 
C2 C1 S1 112.26(13) . . ? 
O2 C2 C1 108.47(16) . . ? 
O2 C2 C3 109.62(16) . . ? 
C1 C2 C3 112.80(16) . . ? 
F1 C3 F2 106.09(16) . . ? 
F1 C3 C2 109.98(17) . . ? 
F2 C3 C2 108.34(15) . . ? 
C12 C11 C16 120.78(18) . . ? 
C12 C11 S1 119.70(15) . . ? 
C16 C11 S1 119.44(15) . . ? 
C11 C12 C13 119.04(17) . . ? 
C12 C13 C14 121.62(19) . . ? 
C13 C14 C15 117.86(18) . . ? 
C13 C14 C7 120.8(2) . . ? 
C15 C14 C7 121.3(2) . . ? 
C16 C15 C14 121.22(18) . . ? 
C11 C16 C15 119.45(18) . . ? 
  
loop_ 
 _geom_torsion_atom_site_label_1 
 _geom_torsion_atom_site_label_2 
 _geom_torsion_atom_site_label_3 
 _geom_torsion_atom_site_label_4 
 _geom_torsion 
 _geom_torsion_site_symmetry_1 
 _geom_torsion_site_symmetry_2 
 _geom_torsion_site_symmetry_3 
 _geom_torsion_site_symmetry_4 
 _geom_torsion_publ_flag 
O1 S1 C1 C2 67.65(17) . . . . ? 
C11 S1 C1 C2 177.46(15) . . . . ? 
S1 C1 C2 O2 49.80(19) . . . . ? 
S1 C1 C2 C3 -71.8(2) . . . . ? 
O2 C2 C3 F1 -179.07(15) . . . . ? 
C1 C2 C3 F1 -58.1(2) . . . . ? 
O2 C2 C3 F2 65.4(2) . . . . ? 
C1 C2 C3 F2 -173.64(16) . . . . ? 
O1 S1 C11 C12 20.45(17) . . . . ? 
C1 S1 C11 C12 -87.49(16) . . . . ? 
O1 S1 C11 C16 -156.25(15) . . . . ? 
C1 S1 C11 C16 95.81(16) . . . . ? 
C16 C11 C12 C13 -1.1(3) . . . . ? 
S1 C11 C12 C13 -177.79(15) . . . . ? 
C11 C12 C13 C14 1.8(3) . . . . ? 
C12 C13 C14 C15 -2.0(3) . . . . ? 
C12 C13 C14 C7 177.82(19) . . . . ? 
C13 C14 C15 C16 1.4(3) . . . . ? 
C7 C14 C15 C16 -178.34(19) . . . . ? 
C12 C11 C16 C15 0.6(3) . . . . ? 
S1 C11 C16 C15 177.31(15) . . . . ? 
C14 C15 C16 C11 -0.8(3) . . . . ? 
O1 S1 C2 O2 110.34(12) . . . . ? 
C11 S1 C2 O2 -136.35(12) . . . . ? 
H2 O2 C2 H2A 48.8 . . . . ? 
H2 O2 S1 O1 11.6 . . . . ? 
H2 O2 C1 H1A 93.5 . . . . ? 
  
loop_ 
 _geom_hbond_atom_site_label_D 
 _geom_hbond_atom_site_label_H 
 _geom_hbond_atom_site_label_A 
 _geom_hbond_distance_DH 
 _geom_hbond_distance_HA 
 _geom_hbond_distance_DA 
 _geom_hbond_angle_DHA 
 _geom_hbond_site_symmetry_A 
C3 H3 O1  1.00 2.36 3.020(2) 122.7 . 
O2 H2 O1  0.84 1.89 2.713(2) 165.2 2_756 
C3 H3 O2  1.00 2.97 3.837(3) 145.7 2_746 
C1 H1B O1  0.99 2.91 3.864(3) 162.4 1_455 
C2 H2A O2  1.00 2.90 3.546(2) 123.2 1_455 
C3 H3 F1  1.00 2.87 3.587(3) 129.6 1_655 
C12 H12 F2  0.95 2.48 3.170(2) 129.6 2_646 
C15 H15 F2  0.95 2.80 3.576(2) 139.5 1_454 
  
_diffrn_measured_fraction_theta_max    0.993 
_diffrn_reflns_theta_full              30.03 
_diffrn_measured_fraction_theta_full   0.993 
_refine_diff_density_max    0.326 
_refine_diff_density_min   -0.194 
_refine_diff_density_rms    0.044 
 


#===END

  
data_mms04_3bI
  
_audit_creation_method            SHELXL-97 
_chemical_name_systematic 
; 
 ? 
; 
_chemical_name_common             ? 
_chemical_melting_point           ? 
_chemical_formula_moiety          ? 
_chemical_formula_sum 
 'C10 H11 F3 O2 S' 
_chemical_formula_weight          252.25 
_chemical_absolute_configuration  ad
  
loop_ 
 _atom_type_symbol 
 _atom_type_description 
 _atom_type_scat_dispersion_real 
 _atom_type_scat_dispersion_imag 
 _atom_type_scat_source 
 'C'  'C'   0.0033   0.0016 
 'International Tables Vol C Tables 4.2.6.8 and 6.1.1.4' 
 'H'  'H'   0.0000   0.0000 
 'International Tables Vol C Tables 4.2.6.8 and 6.1.1.4' 
 'O'  'O'   0.0106   0.0060 
 'International Tables Vol C Tables 4.2.6.8 and 6.1.1.4' 
 'F'  'F'   0.0171   0.0103 
 'International Tables Vol C Tables 4.2.6.8 and 6.1.1.4' 
 'S'  'S'   0.1246   0.1234 
 'International Tables Vol C Tables 4.2.6.8 and 6.1.1.4' 
  
_symmetry_cell_setting            monoclinic 
_symmetry_space_group_name_H-M    P2(1) 
  
loop_ 
 _symmetry_equiv_pos_as_xyz 
 'x, y, z' 
 '-x, y+1/2, -z' 
  
_cell_length_a                    6.1239(12) 
_cell_length_b                    9.3422(19) 
_cell_length_c                    10.132(2) 
_cell_angle_alpha                 90.00 
_cell_angle_beta                  102.41(3) 
_cell_angle_gamma                 90.00 
_cell_volume                      566.1(2) 
_cell_formula_units_Z             2 
_cell_measurement_temperature     173(2) 
_cell_measurement_reflns_used     3149 
_cell_measurement_theta_min       0.998 
_cell_measurement_theta_max       30.034 
  
_exptl_crystal_description        prism 
_exptl_crystal_colour             colourless 
_exptl_crystal_size_max           0.40 
_exptl_crystal_size_mid           0.24 
_exptl_crystal_size_min           0.18 
_exptl_crystal_density_meas       ? 
_exptl_crystal_density_diffrn     1.480 
_exptl_crystal_density_method     'not measured' 
_exptl_crystal_F_000              260 
_exptl_absorpt_coefficient_mu     0.309 
_exptl_absorpt_correction_type    none 
_exptl_absorpt_correction_T_min   ? 
_exptl_absorpt_correction_T_max   ? 
_exptl_absorpt_process_details    ? 
  
_exptl_special_details 
; 
 ? 
; 
  
_diffrn_ambient_temperature       173(2) 
_diffrn_radiation_wavelength      0.71073 
_diffrn_radiation_type            MoK\a 
_diffrn_radiation_source          'fine-focus sealed tube' 
_diffrn_radiation_monochromator   graphite 
_diffrn_measurement_device_type   Nonius-KappaCCD 
_diffrn_measurement_method        \w-scans 
_diffrn_detector_area_resol_mean  9 
_diffrn_standards_number          ? 
_diffrn_standards_interval_count  ? 
_diffrn_standards_interval_time   ? 
_diffrn_standards_decay_%         ? 
_diffrn_reflns_number             6231 
_diffrn_reflns_av_R_equivalents   0.0236 
_diffrn_reflns_av_sigmaI/netI     0.0375 
_diffrn_reflns_limit_h_min        -8 
_diffrn_reflns_limit_h_max        8 
_diffrn_reflns_limit_k_min        -13 
_diffrn_reflns_limit_k_max        13 
_diffrn_reflns_limit_l_min        -14 
_diffrn_reflns_limit_l_max        14 
_diffrn_reflns_theta_min          5.23 
_diffrn_reflns_theta_max          30.03 
_reflns_number_total              3252 
_reflns_number_gt                 2462 
_reflns_threshold_expression      >2sigma(I) 
  
_computing_data_collection        'Collect (Nonius BV, 1997-2000)' 
_computing_cell_refinement        'HKL Denzo (Otwinowski & Minor 1997)' 
_computing_data_reduction         'HKL Scalepack (Otwinowski & Minor 1997)' 
_computing_structure_solution     'SHELXS-97 (Sheldrick, 1990)' 
_computing_structure_refinement   'SHELXL-97 (Sheldrick, 1997)' 
_computing_molecular_graphics     'SHELXTL v6.14 (Bruker AXS, 2000-2003)' 
_computing_publication_material   'SHELXL-97 (Sheldrick, 1997)' 
  
_refine_special_details 
; 
 Refinement of F^2^ against ALL reflections.  The weighted R-factor wR and 
 goodness of fit S are based on F^2^, conventional R-factors R are based 
 on F, with F set to zero for negative F^2^. The threshold expression of 
 F^2^ > 2sigma(F^2^) is used only for calculating R-factors(gt) etc. and is 
 not relevant to the choice of reflections for refinement.  R-factors based 
 on F^2^ are statistically about twice as large as those based on F, and R- 
 factors based on ALL data will be even larger. 
; 
  
_refine_ls_structure_factor_coef  Fsqd 
_refine_ls_matrix_type            full 
_refine_ls_weighting_scheme       calc 
_refine_ls_weighting_details 
 'calc w=1/[\s^2^(Fo^2^)+(0.0655P)^2^+0.0000P] where P=(Fo^2^+2Fc^2^)/3' 
_atom_sites_solution_primary      direct 
_atom_sites_solution_secondary    difmap 
_atom_sites_solution_hydrogens    geom 
_refine_ls_hydrogen_treatment     constr 
_refine_ls_extinction_method      none 
_refine_ls_extinction_coef        ? 
_refine_ls_abs_structure_details 
 'Flack H D (1983), Acta Cryst. A39, 876-881' 
_refine_ls_abs_structure_Flack    0.01(7) 
_refine_ls_number_reflns          3252 
_refine_ls_number_parameters      147 
_refine_ls_number_restraints      85 
_refine_ls_R_factor_all           0.0626 
_refine_ls_R_factor_gt            0.0418 
_refine_ls_wR_factor_ref          0.1095 
_refine_ls_wR_factor_gt           0.1022 
_refine_ls_goodness_of_fit_ref    1.033 
_refine_ls_restrained_S_all       1.020 
_refine_ls_shift/su_max           0.000 
_refine_ls_shift/su_mean          0.000 
  
loop_ 
 _atom_site_label 
 _atom_site_type_symbol 
 _atom_site_fract_x 
 _atom_site_fract_y 
 _atom_site_fract_z 
 _atom_site_U_iso_or_equiv 
 _atom_site_adp_type 
 _atom_site_occupancy 
 _atom_site_symmetry_multiplicity 
 _atom_site_calc_flag 
 _atom_site_refinement_flags 
 _atom_site_disorder_assembly 
 _atom_site_disorder_group 
S1 S 0.50320(8) -0.04316(6) 0.99076(4) 0.04918(15) Uani 1 1 d U . . 
O1 O 0.2600(2) -0.0458(3) 0.99551(15) 0.0686(4) Uani 1 1 d U . . 
O2 O 0.9724(2) -0.05086(19) 1.15552(17) 0.0608(4) Uani 1 1 d U . . 
H2 H 1.0683 -0.0557 1.1075 0.091 Uiso 1 1 calc R . . 
F1 F 0.8939(3) 0.29900(16) 1.27500(15) 0.0801(5) Uani 1 1 d U . . 
F2 F 0.9490(3) 0.10103(17) 1.38519(13) 0.0765(4) Uani 1 1 d U . . 
F3 F 1.2010(3) 0.1826(2) 1.28463(19) 0.0900(6) Uani 1 1 d U . . 
C1 C 0.6275(3) 0.0728(2) 1.1307(2) 0.0466(4) Uani 1 1 d U . . 
H1B H 0.5590 0.1690 1.1158 0.056 Uiso 1 1 calc R . . 
H1A H 0.5954 0.0339 1.2154 0.056 Uiso 1 1 calc R . . 
C2 C 0.8791(3) 0.0858(2) 1.1455(2) 0.0489(4) Uani 1 1 d U . . 
H2A H 0.9127 0.1363 1.0651 0.059 Uiso 1 1 calc R . . 
C3 C 0.9809(4) 0.1678(3) 1.2735(2) 0.0614(6) Uani 1 1 d U . . 
C11 C 0.5266(3) 0.07131(19) 0.85293(18) 0.0414(4) Uani 1 1 d U . . 
C12 C 0.7155(3) 0.0635(2) 0.7989(2) 0.0486(4) Uani 1 1 d U . . 
H12 H 0.8322 -0.0018 0.8348 0.058 Uiso 1 1 calc R . . 
C13 C 0.7319(4) 0.1518(3) 0.6921(2) 0.0532(5) Uani 1 1 d U . . 
H13 H 0.8626 0.1483 0.6558 0.064 Uiso 1 1 calc R . . 
C14 C 0.5600(4) 0.2463(2) 0.6366(2) 0.0526(5) Uani 1 1 d U . . 
C15 C 0.3691(4) 0.2473(2) 0.6897(2) 0.0518(5) Uani 1 1 d U . . 
H15 H 0.2482 0.3081 0.6506 0.062 Uiso 1 1 calc R . . 
C16 C 0.3509(3) 0.1620(2) 0.7985(2) 0.0470(4) Uani 1 1 d U . . 
H16 H 0.2206 0.1654 0.8351 0.056 Uiso 1 1 calc R . . 
C7 C 0.5843(5) 0.3452(3) 0.5226(3) 0.0752(7) Uani 1 1 d U . . 
H7A H 0.7226 0.4006 0.5493 0.113 Uiso 1 1 calc R . . 
H7B H 0.4563 0.4106 0.5026 0.113 Uiso 1 1 calc R . . 
H7C H 0.5897 0.2886 0.4420 0.113 Uiso 1 1 calc R . . 
  
loop_ 
 _atom_site_aniso_label 
 _atom_site_aniso_U_11 
 _atom_site_aniso_U_22 
 _atom_site_aniso_U_33 
 _atom_site_aniso_U_23 
 _atom_site_aniso_U_13 
 _atom_site_aniso_U_12 
S1 0.0503(3) 0.0418(2) 0.0548(3) -0.0010(2) 0.00988(18) -0.0054(2) 
O1 0.0509(8) 0.0930(11) 0.0637(8) 0.0018(11) 0.0164(6) -0.0214(10) 
O2 0.0493(7) 0.0512(8) 0.0871(10) 0.0029(9) 0.0259(7) -0.0001(8) 
F1 0.1127(13) 0.0529(8) 0.0707(9) -0.0103(6) 0.0111(8) -0.0150(8) 
F2 0.0890(11) 0.0858(11) 0.0508(7) 0.0078(7) 0.0067(6) -0.0069(8) 
F3 0.0671(10) 0.1103(15) 0.0845(10) -0.0121(9) -0.0016(8) -0.0321(9) 
C1 0.0490(10) 0.0458(10) 0.0457(9) 0.0017(8) 0.0115(8) 0.0005(9) 
C2 0.0502(11) 0.0438(10) 0.0531(10) 0.0035(8) 0.0118(8) -0.0024(9) 
C3 0.0650(14) 0.0628(14) 0.0535(12) 0.0031(10) 0.0063(10) -0.0121(10) 
C11 0.0416(10) 0.0370(8) 0.0443(9) -0.0039(7) 0.0062(7) -0.0025(8) 
C12 0.0403(10) 0.0515(10) 0.0524(10) -0.0072(8) 0.0067(8) 0.0052(8) 
C13 0.0434(10) 0.0664(12) 0.0501(10) -0.0079(9) 0.0108(8) -0.0028(9) 
C14 0.0573(12) 0.0547(11) 0.0425(9) -0.0083(8) 0.0037(8) -0.0099(9) 
C15 0.0498(11) 0.0454(10) 0.0539(11) -0.0063(8) -0.0028(8) 0.0057(8) 
C16 0.0395(9) 0.0474(10) 0.0528(10) -0.0079(8) 0.0069(8) 0.0041(8) 
C7 0.0842(18) 0.0775(18) 0.0582(14) 0.0099(12) 0.0021(12) -0.0169(14) 
  
_geom_special_details 
; 
 All esds (except the esd in the dihedral angle between two l.s. planes) 
 are estimated using the full covariance matrix.  The cell esds are taken 
 into account individually in the estimation of esds in distances, angles 
 and torsion angles; correlations between esds in cell parameters are only 
 used when they are defined by crystal symmetry.  An approximate (isotropic) 
 treatment of cell esds is used for estimating esds involving l.s. planes. 
; 
  
loop_ 
 _geom_bond_atom_site_label_1 
 _geom_bond_atom_site_label_2 
 _geom_bond_distance 
 _geom_bond_site_symmetry_2 
 _geom_bond_publ_flag 
S1 O1 1.5007(16) . ? 
S1 C11 1.7889(19) . ? 
S1 C1 1.816(2) . ? 
O2 C2 1.394(3) . ? 
F1 C3 1.338(3) . ? 
F2 C3 1.343(3) . ? 
F3 C3 1.335(3) . ? 
C1 C2 1.520(3) . ? 
C2 C3 1.520(3) . ? 
C11 C12 1.384(3) . ? 
C11 C16 1.387(3) . ? 
C12 C13 1.382(3) . ? 
C13 C14 1.396(3) . ? 
C14 C15 1.388(3) . ? 
C14 C7 1.511(3) . ? 
C15 C16 1.384(3) . ? 
  
loop_ 
 _geom_angle_atom_site_label_1 
 _geom_angle_atom_site_label_2 
 _geom_angle_atom_site_label_3 
 _geom_angle 
 _geom_angle_site_symmetry_1 
 _geom_angle_site_symmetry_3 
 _geom_angle_publ_flag 
O1 S1 C11 106.34(10) . . ? 
O1 S1 C1 103.74(10) . . ? 
C11 S1 C1 99.34(9) . . ? 
C2 C1 S1 111.77(14) . . ? 
O2 C2 C3 108.22(18) . . ? 
O2 C2 C1 108.94(16) . . ? 
C3 C2 C1 110.23(18) . . ? 
F3 C3 F1 107.5(2) . . ? 
F3 C3 F2 107.70(19) . . ? 
F1 C3 F2 106.6(2) . . ? 
F3 C3 C2 110.3(2) . . ? 
F1 C3 C2 112.34(19) . . ? 
F2 C3 C2 112.22(19) . . ? 
C12 C11 C16 121.21(19) . . ? 
C12 C11 S1 119.39(15) . . ? 
C16 C11 S1 119.34(15) . . ? 
C13 C12 C11 119.06(19) . . ? 
C12 C13 C14 121.16(19) . . ? 
C15 C14 C13 118.24(19) . . ? 
C15 C14 C7 121.4(2) . . ? 
C13 C14 C7 120.3(2) . . ? 
C16 C15 C14 121.57(19) . . ? 
C15 C16 C11 118.68(19) . . ? 
  
loop_ 
 _geom_torsion_atom_site_label_1 
 _geom_torsion_atom_site_label_2 
 _geom_torsion_atom_site_label_3 
 _geom_torsion_atom_site_label_4 
 _geom_torsion 
 _geom_torsion_site_symmetry_1 
 _geom_torsion_site_symmetry_2 
 _geom_torsion_site_symmetry_3 
 _geom_torsion_site_symmetry_4 
 _geom_torsion_publ_flag 
O1 S1 C1 C2 178.32(14) . . . . ? 
C11 S1 C1 C2 -72.18(15) . . . . ? 
S1 C1 C2 O2 -54.24(19) . . . . ? 
S1 C1 C2 C3 -172.85(14) . . . . ? 
O2 C2 C3 F3 62.6(2) . . . . ? 
C1 C2 C3 F3 -178.32(18) . . . . ? 
O2 C2 C3 F1 -177.49(18) . . . . ? 
C1 C2 C3 F1 -58.4(2) . . . . ? 
O2 C2 C3 F2 -57.4(3) . . . . ? 
C1 C2 C3 F2 61.6(3) . . . . ? 
O1 S1 C11 C12 -161.63(15) . . . . ? 
C1 S1 C11 C12 90.97(16) . . . . ? 
O1 S1 C11 C16 15.67(17) . . . . ? 
C1 S1 C11 C16 -91.73(16) . . . . ? 
C16 C11 C12 C13 2.5(3) . . . . ? 
S1 C11 C12 C13 179.74(15) . . . . ? 
C11 C12 C13 C14 -1.3(3) . . . . ? 
C12 C13 C14 C15 -1.2(3) . . . . ? 
C12 C13 C14 C7 178.1(2) . . . . ? 
C13 C14 C15 C16 2.6(3) . . . . ? 
C7 C14 C15 C16 -176.7(2) . . . . ? 
C14 C15 C16 C11 -1.4(3) . . . . ? 
C12 C11 C16 C15 -1.2(3) . . . . ? 
S1 C11 C16 C15 -178.43(14) . . . . ? 
O1 S1 C2 O2 127.37(15) . . . . ? 
C11 S1 C2 O2 -120.33(12) . . . . ? 
H2 O2 C2 H2A 16.5 . . . . ? 
H2 O2 S1 O1 173.6 . . . . ? 
H2 O2 C1 H1A 178.5 . . . . ? 
  
loop_ 
 _geom_hbond_atom_site_label_D 
 _geom_hbond_atom_site_label_H 
 _geom_hbond_atom_site_label_A 
 _geom_hbond_distance_DH 
 _geom_hbond_distance_HA 
 _geom_hbond_distance_DA 
 _geom_hbond_angle_DHA 
 _geom_hbond_site_symmetry_A 
O2 H2 O1  0.84 1.80 2.638(2) 173.0 1_655 
C12 H12 O1  0.95 2.80 3.643(3) 148.1 1_655 
C12 H12 F1  0.95 2.88 3.627(3) 135.9 2_747 
C7 H7A F2  0.98 2.72 3.688(3) 168.4 2_757 
C7 H7C F1  0.98 2.77 3.481(4) 129.6 1_554 
  
_diffrn_measured_fraction_theta_max    0.990 
_diffrn_reflns_theta_full              30.03 
_diffrn_measured_fraction_theta_full   0.990 
_refine_diff_density_max    0.419 
_refine_diff_density_min   -0.204 
_refine_diff_density_rms    0.041 

#===END

  
data_mpp03_3bII
  
_audit_creation_method            SHELXL-97 
_chemical_name_systematic 
; 
 ? 
; 
_chemical_name_common             ? 
_chemical_melting_point           ? 
_chemical_formula_moiety          ? 
_chemical_formula_sum 
 'C10 H11 F3 O2 S' 
_chemical_formula_weight          252.25 
_chemical_absolute_configuration  ad
  
loop_ 
 _atom_type_symbol 
 _atom_type_description 
 _atom_type_scat_dispersion_real 
 _atom_type_scat_dispersion_imag 
 _atom_type_scat_source 
 'C'  'C'   0.0033   0.0016 
 'International Tables Vol C Tables 4.2.6.8 and 6.1.1.4' 
 'H'  'H'   0.0000   0.0000 
 'International Tables Vol C Tables 4.2.6.8 and 6.1.1.4' 
 'O'  'O'   0.0106   0.0060 
 'International Tables Vol C Tables 4.2.6.8 and 6.1.1.4' 
 'F'  'F'   0.0171   0.0103 
 'International Tables Vol C Tables 4.2.6.8 and 6.1.1.4' 
 'S'  'S'   0.1246   0.1234 
 'International Tables Vol C Tables 4.2.6.8 and 6.1.1.4' 
  
_symmetry_cell_setting            Monoclinic 
_symmetry_space_group_name_H-M    C2 
  
loop_ 
 _symmetry_equiv_pos_as_xyz 
 'x, y, z' 
 '-x, y, -z' 
 'x+1/2, y+1/2, z' 
 '-x+1/2, y+1/2, -z' 
  
_cell_length_a                    17.200(3) 
_cell_length_b                    5.9594(12) 
_cell_length_c                    13.889(3) 
_cell_angle_alpha                 90.00 
_cell_angle_beta                  126.25(3) 
_cell_angle_gamma                 90.00 
_cell_volume                      1148.0(5) 
_cell_formula_units_Z             4 
_cell_measurement_temperature     173(2) 
_cell_measurement_reflns_used     4148 
_cell_measurement_theta_min       0.998 
_cell_measurement_theta_max       30.034 
  
_exptl_crystal_description        needle 
_exptl_crystal_colour             colourless 
_exptl_crystal_size_max           0.56 
_exptl_crystal_size_mid           0.08 
_exptl_crystal_size_min           0.08 
_exptl_crystal_density_meas       ? 
_exptl_crystal_density_diffrn     1.459 
_exptl_crystal_density_method     'not measured' 
_exptl_crystal_F_000              520 
_exptl_absorpt_coefficient_mu     0.304 
_exptl_absorpt_correction_type    none 
_exptl_absorpt_correction_T_min   ? 
_exptl_absorpt_correction_T_max   ? 
_exptl_absorpt_process_details    ? 
  
_exptl_special_details 
; 
 ? 
; 
  
_diffrn_ambient_temperature       173(2) 
_diffrn_radiation_wavelength      0.71073 
_diffrn_radiation_type            MoK\a 
_diffrn_radiation_source          'fine-focus sealed tube' 
_diffrn_radiation_monochromator   graphite 
_diffrn_measurement_device_type   'Nonius Kappa CCD' 
_diffrn_measurement_method        '\w scans' 
_diffrn_detector_area_resol_mean  9 
_diffrn_standards_number          ? 
_diffrn_standards_interval_count  ? 
_diffrn_standards_interval_time   ? 
_diffrn_standards_decay_%         ? 
_diffrn_reflns_number             4706 
_diffrn_reflns_av_R_equivalents   0.0564 
_diffrn_reflns_av_sigmaI/netI     0.1348 
_diffrn_reflns_limit_h_min        -22 
_diffrn_reflns_limit_h_max        23 
_diffrn_reflns_limit_k_min        -8 
_diffrn_reflns_limit_k_max        8 
_diffrn_reflns_limit_l_min        -17 
_diffrn_reflns_limit_l_max        18 
_diffrn_reflns_theta_min          5.14 
_diffrn_reflns_theta_max          29.91 
_reflns_number_total              2749 
_reflns_number_gt                 1564 
_reflns_threshold_expression      >2sigma(I) 
  
_computing_data_collection        'Collect (Nonius BV, 1997-2000)' 
_computing_cell_refinement        'HKL Denzo (Otwinowski & Minor 1997)' 
_computing_data_reduction         'HKL Scalepack (Otwinowski & Minor 1997)' 
_computing_structure_solution     'SHELXS-97 (Sheldrick, 1990)' 
_computing_structure_refinement   'SHELXL-97 (Sheldrick, 1997)' 
_computing_molecular_graphics     'SHELXTL v6.14 (Bruker AXS, 2000-2003)' 
_computing_publication_material   'SHELXL-97 (Sheldrick, 1997)' 
  
_refine_special_details 
; 
 Refinement of F^2^ against ALL reflections.  The weighted R-factor wR and 
 goodness of fit S are based on F^2^, conventional R-factors R are based 
 on F, with F set to zero for negative F^2^. The threshold expression of 
 F^2^ > 2sigma(F^2^) is used only for calculating R-factors(gt) etc. and is 
 not relevant to the choice of reflections for refinement.  R-factors based 
 on F^2^ are statistically about twice as large as those based on F, and R- 
 factors based on ALL data will be even larger. 
; 
  
_refine_ls_structure_factor_coef  Fsqd 
_refine_ls_matrix_type            full 
_refine_ls_weighting_scheme       calc 
_refine_ls_weighting_details 
 'calc w=1/[\s^2^(Fo^2^)+(0.0220P)^2^+0.0000P] where P=(Fo^2^+2Fc^2^)/3' 
_atom_sites_solution_primary      direct 
_atom_sites_solution_secondary    difmap 
_atom_sites_solution_hydrogens    geom 
_refine_ls_hydrogen_treatment     constr 
_refine_ls_extinction_method      none 
_refine_ls_extinction_coef        ? 
_refine_ls_abs_structure_details 
 'Flack H D (1983), Acta Cryst. A39, 876-881' 
_refine_ls_abs_structure_Flack    -0.16(8) 
_refine_ls_number_reflns          2749 
_refine_ls_number_parameters      147 
_refine_ls_number_restraints      124 
_refine_ls_R_factor_all           0.1058 
_refine_ls_R_factor_gt            0.0445 
_refine_ls_wR_factor_ref          0.0806 
_refine_ls_wR_factor_gt           0.0699 
_refine_ls_goodness_of_fit_ref    0.863 
_refine_ls_restrained_S_all       0.845 
_refine_ls_shift/su_max           0.000 
_refine_ls_shift/su_mean          0.000 
  
loop_ 
 _atom_site_label 
 _atom_site_type_symbol 
 _atom_site_fract_x 
 _atom_site_fract_y 
 _atom_site_fract_z 
 _atom_site_U_iso_or_equiv 
 _atom_site_adp_type 
 _atom_site_occupancy 
 _atom_site_symmetry_multiplicity 
 _atom_site_calc_flag 
 _atom_site_refinement_flags 
 _atom_site_disorder_assembly 
 _atom_site_disorder_group 
S1 S 0.53519(5) 0.25419(13) 0.25555(6) 0.0320(2) Uani 1 1 d U . . 
O1 O 0.53798(13) 0.0019(3) 0.25694(16) 0.0384(5) Uani 1 1 d U . . 
O2 O 0.66034(12) 0.6749(3) 0.39292(16) 0.0336(5) Uani 1 1 d U . . 
H2 H 0.6332 0.7889 0.3500 0.044 Uiso 1 1 calc R . . 
F1 F 0.64946(14) 0.8732(3) 0.56658(16) 0.0551(6) Uani 1 1 d U . . 
F2 F 0.73959(11) 0.5806(3) 0.62973(13) 0.0438(5) Uani 1 1 d U . . 
F3 F 0.59951(12) 0.5649(3) 0.59338(14) 0.0489(5) Uani 1 1 d U . . 
C1 C 0.5984(2) 0.3326(4) 0.4111(2) 0.0322(7) Uani 1 1 d U . . 
H1B H 0.5648 0.2670 0.4428 0.039 Uiso 1 1 calc R . . 
H1A H 0.6646 0.2705 0.4578 0.039 Uiso 1 1 calc R . . 
C2 C 0.60352(19) 0.5861(4) 0.4263(2) 0.0268(6) Uani 1 1 d U . . 
H2A H 0.5370 0.6503 0.3737 0.032 Uiso 1 1 calc R . . 
C3 C 0.6480(2) 0.6491(6) 0.5537(3) 0.0354(7) Uani 1 1 d U . . 
C11 C 0.4155(2) 0.3251(5) 0.2047(2) 0.0294(7) Uani 1 1 d U . . 
C12 C 0.3626(2) 0.1761(4) 0.2202(2) 0.0338(7) Uani 1 1 d U . . 
H12 H 0.3897 0.0365 0.2590 0.041 Uiso 1 1 calc R . . 
C13 C 0.26911(19) 0.2328(6) 0.1785(2) 0.0389(8) Uani 1 1 d U . . 
H13 H 0.2324 0.1305 0.1891 0.047 Uiso 1 1 calc R . . 
C14 C 0.2285(2) 0.4365(5) 0.1215(2) 0.0382(8) Uani 1 1 d U . . 
C15 C 0.2831(2) 0.5824(5) 0.1066(2) 0.0392(8) Uani 1 1 d U . . 
H15 H 0.2561 0.7218 0.0674 0.047 Uiso 1 1 calc R . . 
C16 C 0.3769(2) 0.5292(5) 0.1478(2) 0.0343(7) Uani 1 1 d U . . 
H16 H 0.4138 0.6308 0.1371 0.041 Uiso 1 1 calc R . . 
C7 C 0.1270(2) 0.4961(6) 0.0757(3) 0.0560(10) Uani 1 1 d U . . 
H7A H 0.0823 0.4477 -0.0076 0.073 Uiso 1 1 calc R . . 
H7B H 0.1219 0.6589 0.0806 0.073 Uiso 1 1 calc R . . 
H7C H 0.1107 0.4206 0.1243 0.073 Uiso 1 1 calc R . . 
  
loop_ 
 _atom_site_aniso_label 
 _atom_site_aniso_U_11 
 _atom_site_aniso_U_22 
 _atom_site_aniso_U_33 
 _atom_site_aniso_U_23 
 _atom_site_aniso_U_13 
 _atom_site_aniso_U_12 
S1 0.0275(4) 0.0326(4) 0.0316(4) 0.0003(4) 0.0150(3) -0.0003(4) 
O1 0.0331(12) 0.0256(13) 0.0434(13) -0.0036(9) 0.0155(10) 0.0036(9) 
O2 0.0295(11) 0.0329(13) 0.0402(13) 0.0072(8) 0.0216(10) 0.0014(8) 
F1 0.0738(15) 0.0336(13) 0.0471(12) -0.0074(9) 0.0299(11) 0.0023(10) 
F2 0.0255(9) 0.0602(12) 0.0319(9) 0.0011(8) 0.0095(8) 0.0040(9) 
F3 0.0390(10) 0.0757(14) 0.0374(10) 0.0005(9) 0.0256(9) -0.0016(9) 
C1 0.0253(16) 0.0339(17) 0.0288(17) 0.0025(11) 0.0113(13) 0.0027(12) 
C2 0.0227(14) 0.0293(17) 0.0250(14) 0.0037(12) 0.0122(12) 0.0012(12) 
C3 0.0275(17) 0.0382(19) 0.0345(18) -0.0006(16) 0.0151(15) -0.0038(16) 
C11 0.0245(15) 0.0309(17) 0.0265(16) -0.0025(12) 0.0115(13) 0.0022(12) 
C12 0.0307(16) 0.0301(18) 0.0332(17) 0.0024(12) 0.0148(14) 0.0017(13) 
C13 0.0319(16) 0.048(2) 0.0392(18) -0.0020(16) 0.0224(14) -0.0040(16) 
C14 0.0279(17) 0.055(2) 0.0244(17) -0.0043(15) 0.0117(14) 0.0068(16) 
C15 0.0358(17) 0.045(2) 0.0277(16) 0.0059(14) 0.0138(14) 0.0133(16) 
C16 0.0345(18) 0.0322(18) 0.0281(17) 0.0027(12) 0.0141(14) -0.0021(13) 
C7 0.0302(18) 0.089(3) 0.041(2) -0.0029(19) 0.0170(17) 0.0110(18) 
  
_geom_special_details 
; 
 All esds (except the esd in the dihedral angle between two l.s. planes) 
 are estimated using the full covariance matrix.  The cell esds are taken 
 into account individually in the estimation of esds in distances, angles 
 and torsion angles; correlations between esds in cell parameters are only 
 used when they are defined by crystal symmetry.  An approximate (isotropic) 
 treatment of cell esds is used for estimating esds involving l.s. planes. 
; 
  
loop_ 
 _geom_bond_atom_site_label_1 
 _geom_bond_atom_site_label_2 
 _geom_bond_distance 
 _geom_bond_site_symmetry_2 
 _geom_bond_publ_flag 
S1 O1 1.5038(19) . ? 
S1 C11 1.787(3) . ? 
S1 C1 1.814(3) . ? 
O2 C2 1.410(3) . ? 
F1 C3 1.346(3) . ? 
F2 C3 1.340(3) . ? 
F3 C3 1.340(3) . ? 
C1 C2 1.521(3) . ? 
C2 C3 1.502(4) . ? 
C11 C12 1.377(4) . ? 
C11 C16 1.387(4) . ? 
C12 C13 1.391(4) . ? 
C13 C14 1.391(4) . ? 
C14 C15 1.382(4) . ? 
C14 C7 1.505(4) . ? 
C15 C16 1.394(4) . ? 
  
loop_ 
 _geom_angle_atom_site_label_1 
 _geom_angle_atom_site_label_2 
 _geom_angle_atom_site_label_3 
 _geom_angle 
 _geom_angle_site_symmetry_1 
 _geom_angle_site_symmetry_3 
 _geom_angle_publ_flag 
O1 S1 C11 105.20(13) . . ? 
O1 S1 C1 104.48(12) . . ? 
C11 S1 C1 98.59(13) . . ? 
C2 C1 S1 111.49(18) . . ? 
O2 C2 C3 108.9(2) . . ? 
O2 C2 C1 108.7(2) . . ? 
C3 C2 C1 111.1(2) . . ? 
F2 C3 F3 106.9(3) . . ? 
F2 C3 F1 106.1(2) . . ? 
F3 C3 F1 106.5(3) . . ? 
F2 C3 C2 113.3(3) . . ? 
F3 C3 C2 112.5(2) . . ? 
F1 C3 C2 111.1(3) . . ? 
C12 C11 C16 121.1(3) . . ? 
C12 C11 S1 119.9(2) . . ? 
C16 C11 S1 118.9(2) . . ? 
C11 C12 C13 119.1(3) . . ? 
C12 C13 C14 121.1(3) . . ? 
C15 C14 C13 118.5(3) . . ? 
C15 C14 C7 120.6(3) . . ? 
C13 C14 C7 120.9(3) . . ? 
C14 C15 C16 121.3(3) . . ? 
C11 C16 C15 118.8(3) . . ? 
  
loop_ 
 _geom_torsion_atom_site_label_1 
 _geom_torsion_atom_site_label_2 
 _geom_torsion_atom_site_label_3 
 _geom_torsion_atom_site_label_4 
 _geom_torsion 
 _geom_torsion_site_symmetry_1 
 _geom_torsion_site_symmetry_2 
 _geom_torsion_site_symmetry_3 
 _geom_torsion_site_symmetry_4 
 _geom_torsion_publ_flag 
O1 S1 C1 C2 179.27(19) . . . . ? 
C11 S1 C1 C2 -72.5(2) . . . . ? 
S1 C1 C2 O2 -65.2(2) . . . . ? 
S1 C1 C2 C3 174.91(19) . . . . ? 
O2 C2 C3 F2 -56.8(3) . . . . ? 
C1 C2 C3 F2 62.9(3) . . . . ? 
O2 C2 C3 F3 -178.2(2) . . . . ? 
C1 C2 C3 F3 -58.5(3) . . . . ? 
O2 C2 C3 F1 62.5(3) . . . . ? 
C1 C2 C3 F1 -177.8(2) . . . . ? 
O1 S1 C11 C12 24.9(3) . . . . ? 
C1 S1 C11 C12 -82.7(2) . . . . ? 
O1 S1 C11 C16 -153.8(2) . . . . ? 
C1 S1 C11 C16 98.5(2) . . . . ? 
C16 C11 C12 C13 -0.3(4) . . . . ? 
S1 C11 C12 C13 -179.1(2) . . . . ? 
C11 C12 C13 C14 0.0(4) . . . . ? 
C12 C13 C14 C15 0.3(4) . . . . ? 
C12 C13 C14 C7 179.6(3) . . . . ? 
C13 C14 C15 C16 -0.3(4) . . . . ? 
C7 C14 C15 C16 -179.6(3) . . . . ? 
C12 C11 C16 C15 0.3(4) . . . . ? 
S1 C11 C16 C15 179.0(2) . . . . ? 
C14 C15 C16 C11 0.0(4) . . . . ? 
O1 S1 C2 O2 119.67(17) . . . . ? 
C11 S1 C2 O2 -129.94(16) . . . . ? 
H2 O2 C2 H2A 16.0 . . . . ? 
H2 O2 S1 O1 166.3 . . . . ? 
H2 O2 C1 H1A 168.0 . . . . ? 
  
loop_ 
 _geom_hbond_atom_site_label_D 
 _geom_hbond_atom_site_label_H 
 _geom_hbond_atom_site_label_A 
 _geom_hbond_distance_DH 
 _geom_hbond_distance_HA 
 _geom_hbond_distance_DA 
 _geom_hbond_angle_DHA 
 _geom_hbond_site_symmetry_A 
O2 H2 O1  0.84 1.86 2.663(3) 159.6 1_565 
C1 H1A O2  0.99 2.51 3.486(4) 168.1 4_646 
C1 H1A F2  0.99 2.80 3.494(3) 127.6 4_646 
C2 H2A F3  1.00 2.69 3.340(3) 122.6 2_656 
C7 H7C O1  0.98 2.81 3.638(4) 142.2 3_455 
C7 H7A O1  0.98 2.81 3.727(4) 155.8 4 
C15 H15 C14  0.95 3.07 3.712(4) 126.4 4 
C15 H15 C15  0.95 3.00 3.867(3) 152.7 4 
C15 H15 C16  0.95 3.07 3.955(4) 155.3 4 
  
_diffrn_measured_fraction_theta_max    0.887 
_diffrn_reflns_theta_full              29.91 
_diffrn_measured_fraction_theta_full   0.887 
_refine_diff_density_max    0.220 
_refine_diff_density_min   -0.253 
_refine_diff_density_rms    0.052 

#===END

  
data_mms07_6b
  
_audit_creation_method            SHELXL-97 
_chemical_name_systematic 
; 
 ? 
; 
_chemical_name_common             ? 
_chemical_melting_point           ? 
_chemical_formula_moiety          ? 
_chemical_formula_sum 
 'C12 H18 O2 S' 
_chemical_formula_weight          226.32 
_chemical_absolute_configuration  ad
  
loop_ 
 _atom_type_symbol 
 _atom_type_description 
 _atom_type_scat_dispersion_real 
 _atom_type_scat_dispersion_imag 
 _atom_type_scat_source 
 'C'  'C'   0.0033   0.0016 
 'International Tables Vol C Tables 4.2.6.8 and 6.1.1.4' 
 'H'  'H'   0.0000   0.0000 
 'International Tables Vol C Tables 4.2.6.8 and 6.1.1.4' 
 'O'  'O'   0.0106   0.0060 
 'International Tables Vol C Tables 4.2.6.8 and 6.1.1.4' 
 'S'  'S'   0.1246   0.1234 
 'International Tables Vol C Tables 4.2.6.8 and 6.1.1.4' 
  
_symmetry_cell_setting            monoclinic 
_symmetry_space_group_name_H-M    C2 
  
loop_ 
 _symmetry_equiv_pos_as_xyz 
 'x, y, z' 
 '-x, y, -z' 
 'x+1/2, y+1/2, z' 
 '-x+1/2, y+1/2, -z' 
  
_cell_length_a                    23.226(5) 
_cell_length_b                    6.0154(12) 
_cell_length_c                    9.885(2) 
_cell_angle_alpha                 90.00 
_cell_angle_beta                  114.92(3) 
_cell_angle_gamma                 90.00 
_cell_volume                      1252.5(5) 
_cell_formula_units_Z             4 
_cell_measurement_temperature     173(2) 
_cell_measurement_reflns_used     2990 
_cell_measurement_theta_min       0.998 
_cell_measurement_theta_max       30.034 
  
_exptl_crystal_description        prism 
_exptl_crystal_colour             colourless 
_exptl_crystal_size_max           0.55 
_exptl_crystal_size_mid           0.40 
_exptl_crystal_size_min           0.30 
_exptl_crystal_density_meas       ? 
_exptl_crystal_density_diffrn     1.200 
_exptl_crystal_density_method     'not measured' 
_exptl_crystal_F_000              488 
_exptl_absorpt_coefficient_mu     0.238 
_exptl_absorpt_correction_type    none 
_exptl_absorpt_correction_T_min   ? 
_exptl_absorpt_correction_T_max   ? 
_exptl_absorpt_process_details    ? 
  
_exptl_special_details 
; 
 ? 
; 
  
_diffrn_ambient_temperature       173(2) 
_diffrn_radiation_wavelength      0.71073 
_diffrn_radiation_type            MoK\a 
_diffrn_radiation_source          'fine-focus sealed tube' 
_diffrn_radiation_monochromator   graphite 
_diffrn_measurement_device_type   KappaCCD 
_diffrn_measurement_method        \w-scans 
_diffrn_detector_area_resol_mean  9 
_diffrn_standards_number          ? 
_diffrn_standards_interval_count  ? 
_diffrn_standards_interval_time   ? 
_diffrn_standards_decay_%         ? 
_diffrn_reflns_number             6149 
_diffrn_reflns_av_R_equivalents   0.0387 
_diffrn_reflns_av_sigmaI/netI     0.0520 
_diffrn_reflns_limit_h_min        -31 
_diffrn_reflns_limit_h_max        32 
_diffrn_reflns_limit_k_min        -8 
_diffrn_reflns_limit_k_max        8 
_diffrn_reflns_limit_l_min        -13 
_diffrn_reflns_limit_l_max        13 
_diffrn_reflns_theta_min          5.25 
_diffrn_reflns_theta_max          30.02 
_reflns_number_total              3537 
_reflns_number_gt                 2929 
_reflns_threshold_expression      >2sigma(I) 
  
_computing_data_collection        'Collect (Nonius BV, 1997-2000)' 
_computing_cell_refinement        'HKL Scalepack (Otwinowski & Minor 1997)' 
_computing_data_reduction         'HKL Scalepack (Otwinowski & Minor 1997)' 
_computing_structure_solution     'SHELXS-97 (Sheldrick, 1990)' 
_computing_structure_refinement   'SHELXL-97 (Sheldrick, 1997)' 
_computing_molecular_graphics     'SHELXTL v6.14 (Bruker AXS, 2000-2003)' 
_computing_publication_material   'SHELXL-97 (Sheldrick, 1997)' 
  
_refine_special_details 
; 
 Refinement of F^2^ against ALL reflections.  The weighted R-factor wR and 
 goodness of fit S are based on F^2^, conventional R-factors R are based 
 on F, with F set to zero for negative F^2^. The threshold expression of 
 F^2^ > 2sigma(F^2^) is used only for calculating R-factors(gt) etc. and is 
 not relevant to the choice of reflections for refinement.  R-factors based 
 on F^2^ are statistically about twice as large as those based on F, and R- 
 factors based on ALL data will be even larger. 
; 
  
_refine_ls_structure_factor_coef  Fsqd 
_refine_ls_matrix_type            full 
_refine_ls_weighting_scheme       calc 
_refine_ls_weighting_details 
 'calc w=1/[\s^2^(Fo^2^)+(0.0780P)^2^+0.4712P] where P=(Fo^2^+2Fc^2^)/3' 
_atom_sites_solution_primary      direct 
_atom_sites_solution_secondary    difmap 
_atom_sites_solution_hydrogens    geom 
_refine_ls_hydrogen_treatment     constr 
_refine_ls_extinction_method      none 
_refine_ls_extinction_coef        ? 
_refine_ls_abs_structure_details 
 'Flack H D (1983), Acta Cryst. A39, 876-881' 
_refine_ls_abs_structure_Flack    0.15(10) 
_refine_ls_number_reflns          3537 
_refine_ls_number_parameters      140 
_refine_ls_number_restraints      105 
_refine_ls_R_factor_all           0.0690 
_refine_ls_R_factor_gt            0.0527 
_refine_ls_wR_factor_ref          0.1461 
_refine_ls_wR_factor_gt           0.1350 
_refine_ls_goodness_of_fit_ref    1.055 
_refine_ls_restrained_S_all       1.040 
_refine_ls_shift/su_max           0.001 
_refine_ls_shift/su_mean          0.000 
  
loop_ 
 _atom_site_label 
 _atom_site_type_symbol 
 _atom_site_fract_x 
 _atom_site_fract_y 
 _atom_site_fract_z 
 _atom_site_U_iso_or_equiv 
 _atom_site_adp_type 
 _atom_site_occupancy 
 _atom_site_symmetry_multiplicity 
 _atom_site_calc_flag 
 _atom_site_refinement_flags 
 _atom_site_disorder_assembly 
 _atom_site_disorder_group 
S1 S 0.76326(3) 0.79718(11) 0.21068(6) 0.04222(16) Uani 1 1 d U . . 
O1 O 0.71578(9) 0.6189(4) 0.1257(2) 0.0561(5) Uani 1 1 d U . . 
O2 O 0.85646(9) 1.1581(3) 0.1773(2) 0.0482(4) Uani 1 1 d U . . 
H2 H 0.8357 1.1602 0.0843 0.058 Uiso 1 1 calc R . . 
C1 C 0.82636(12) 0.7695(5) 0.1510(2) 0.0432(5) Uani 1 1 d U . . 
H1B H 0.8444 0.6179 0.1752 0.052 Uiso 1 1 calc R . . 
H1A H 0.8086 0.7878 0.0413 0.052 Uiso 1 1 calc R . . 
C2 C 0.87914(12) 0.9387(5) 0.2241(3) 0.0426(5) Uani 1 1 d U . . 
H2A H 0.8927 0.9303 0.3343 0.051 Uiso 1 1 calc R . . 
C3 C 0.93696(16) 0.8794(5) 0.1934(4) 0.0591(7) Uani 1 1 d U . . 
H3 H 0.9224 0.8687 0.0829 0.071 Uiso 1 1 calc R . . 
C4 C 0.9863(2) 1.0563(9) 0.2501(7) 0.114(2) Uani 1 1 d U . . 
H4A H 1.0036 1.0623 0.3591 0.137 Uiso 1 1 calc R . . 
H4B H 0.9673 1.2001 0.2083 0.137 Uiso 1 1 calc R . . 
H4C H 1.0206 1.0227 0.2201 0.137 Uiso 1 1 calc R . . 
C5 C 0.9646(2) 0.6573(9) 0.2606(6) 0.0947(14) Uani 1 1 d U . . 
H5A H 0.9982 0.6161 0.2299 0.114 Uiso 1 1 calc R . . 
H5B H 0.9311 0.5441 0.2260 0.114 Uiso 1 1 calc R . . 
H5C H 0.9824 0.6675 0.3697 0.114 Uiso 1 1 calc R . . 
C11 C 0.80426(11) 0.6959(4) 0.3972(2) 0.0378(5) Uani 1 1 d U . . 
C12 C 0.83189(12) 0.4873(4) 0.4265(3) 0.0411(5) Uani 1 1 d U . . 
H12 H 0.8306 0.3941 0.3477 0.049 Uiso 1 1 calc R . . 
C13 C 0.86149(11) 0.4174(4) 0.5736(3) 0.0441(5) Uani 1 1 d U . . 
H13 H 0.8809 0.2749 0.5951 0.053 Uiso 1 1 calc R . . 
C14 C 0.86356(12) 0.5509(5) 0.6905(3) 0.0447(5) Uani 1 1 d U . . 
C15 C 0.83466(12) 0.7577(5) 0.6576(3) 0.0476(6) Uani 1 1 d U . . 
H15 H 0.8353 0.8502 0.7360 0.057 Uiso 1 1 calc R . . 
C16 C 0.80499(11) 0.8306(4) 0.5120(3) 0.0427(5) Uani 1 1 d U . . 
H16 H 0.7851 0.9724 0.4904 0.051 Uiso 1 1 calc R . . 
C7 C 0.89676(15) 0.4688(7) 0.8494(3) 0.0629(8) Uani 1 1 d U . . 
H7A H 0.9380 0.5429 0.8988 0.076 Uiso 1 1 calc R . . 
H7B H 0.9031 0.3078 0.8493 0.076 Uiso 1 1 calc R . . 
H7C H 0.8707 0.5027 0.9030 0.076 Uiso 1 1 calc R . . 
  
loop_ 
 _atom_site_aniso_label 
 _atom_site_aniso_U_11 
 _atom_site_aniso_U_22 
 _atom_site_aniso_U_33 
 _atom_site_aniso_U_23 
 _atom_site_aniso_U_13 
 _atom_site_aniso_U_12 
S1 0.0418(3) 0.0420(3) 0.0415(3) 0.0006(3) 0.0162(2) -0.0022(3) 
O1 0.0512(10) 0.0599(12) 0.0469(10) 0.0008(9) 0.0107(8) -0.0123(9) 
O2 0.0561(10) 0.0404(9) 0.0471(9) -0.0070(8) 0.0207(8) -0.0030(8) 
C1 0.0558(13) 0.0423(14) 0.0364(9) -0.0034(10) 0.0242(9) -0.0042(11) 
C2 0.0453(12) 0.0486(14) 0.0380(11) -0.0026(9) 0.0213(10) -0.0045(10) 
C3 0.0575(16) 0.0591(17) 0.0725(19) -0.0021(14) 0.0389(15) 0.0002(13) 
C4 0.076(3) 0.096(3) 0.194(6) -0.040(3) 0.080(3) -0.030(2) 
C5 0.070(2) 0.089(3) 0.133(4) 0.023(3) 0.050(3) 0.028(2) 
C11 0.0384(10) 0.0412(11) 0.0379(10) -0.0041(9) 0.0200(9) -0.0040(9) 
C12 0.0470(13) 0.0392(12) 0.0426(11) -0.0067(9) 0.0242(10) 0.0001(9) 
C13 0.0441(12) 0.0429(13) 0.0474(12) -0.0003(10) 0.0215(10) 0.0022(10) 
C14 0.0388(12) 0.0583(15) 0.0384(11) -0.0033(10) 0.0178(10) -0.0049(10) 
C15 0.0442(12) 0.0612(18) 0.0404(11) -0.0137(11) 0.0207(9) -0.0042(11) 
C16 0.0406(11) 0.0427(15) 0.0476(11) -0.0089(10) 0.0215(9) -0.0007(9) 
C7 0.0586(17) 0.086(2) 0.0443(13) 0.0027(15) 0.0215(13) 0.0009(15) 
  
_geom_special_details 
; 
 All esds (except the esd in the dihedral angle between two l.s. planes) 
 are estimated using the full covariance matrix.  The cell esds are taken 
 into account individually in the estimation of esds in distances, angles 
 and torsion angles; correlations between esds in cell parameters are only 
 used when they are defined by crystal symmetry.  An approximate (isotropic) 
 treatment of cell esds is used for estimating esds involving l.s. planes. 
; 
  
loop_ 
 _geom_bond_atom_site_label_1 
 _geom_bond_atom_site_label_2 
 _geom_bond_distance 
 _geom_bond_site_symmetry_2 
 _geom_bond_publ_flag 
S1 O1 1.514(2) . ? 
S1 C11 1.788(2) . ? 
S1 C1 1.804(2) . ? 
O2 C2 1.424(3) . ? 
C1 C2 1.522(3) . ? 
C2 C3 1.538(4) . ? 
C3 C4 1.490(5) . ? 
C3 C5 1.510(5) . ? 
C11 C12 1.383(3) . ? 
C11 C16 1.389(3) . ? 
C12 C13 1.386(3) . ? 
C13 C14 1.392(4) . ? 
C14 C15 1.385(4) . ? 
C14 C7 1.511(4) . ? 
C15 C16 1.379(4) . ? 
  
loop_ 
 _geom_angle_atom_site_label_1 
 _geom_angle_atom_site_label_2 
 _geom_angle_atom_site_label_3 
 _geom_angle 
 _geom_angle_site_symmetry_1 
 _geom_angle_site_symmetry_3 
 _geom_angle_publ_flag 
O1 S1 C11 106.14(11) . . ? 
O1 S1 C1 104.78(12) . . ? 
C11 S1 C1 98.77(11) . . ? 
C2 C1 S1 112.69(16) . . ? 
O2 C2 C1 110.6(2) . . ? 
O2 C2 C3 112.7(2) . . ? 
C1 C2 C3 110.3(2) . . ? 
C4 C3 C5 110.4(4) . . ? 
C4 C3 C2 111.0(3) . . ? 
C5 C3 C2 111.3(3) . . ? 
C12 C11 C16 120.9(2) . . ? 
C12 C11 S1 121.59(17) . . ? 
C16 C11 S1 117.48(19) . . ? 
C11 C12 C13 118.4(2) . . ? 
C12 C13 C14 121.7(2) . . ? 
C15 C14 C13 118.6(2) . . ? 
C15 C14 C7 121.5(3) . . ? 
C13 C14 C7 119.9(3) . . ? 
C16 C15 C14 120.7(2) . . ? 
C15 C16 C11 119.7(2) . . ? 
  
loop_ 
 _geom_torsion_atom_site_label_1 
 _geom_torsion_atom_site_label_2 
 _geom_torsion_atom_site_label_3 
 _geom_torsion_atom_site_label_4 
 _geom_torsion 
 _geom_torsion_site_symmetry_1 
 _geom_torsion_site_symmetry_2 
 _geom_torsion_site_symmetry_3 
 _geom_torsion_site_symmetry_4 
 _geom_torsion_publ_flag 
O1 S1 C1 C2 179.38(17) . . . . ? 
C11 S1 C1 C2 -71.25(19) . . . . ? 
S1 C1 C2 O2 -65.7(2) . . . . ? 
S1 C1 C2 C3 169.0(2) . . . . ? 
O2 C2 C3 C4 49.8(4) . . . . ? 
C1 C2 C3 C4 173.9(3) . . . . ? 
O2 C2 C3 C5 173.2(3) . . . . ? 
C1 C2 C3 C5 -62.7(4) . . . . ? 
O1 S1 C11 C12 51.7(2) . . . . ? 
C1 S1 C11 C12 -56.5(2) . . . . ? 
O1 S1 C11 C16 -125.42(19) . . . . ? 
C1 S1 C11 C16 126.31(19) . . . . ? 
C16 C11 C12 C13 -1.3(3) . . . . ? 
S1 C11 C12 C13 -178.36(18) . . . . ? 
C11 C12 C13 C14 0.4(4) . . . . ? 
C12 C13 C14 C15 0.6(4) . . . . ? 
C12 C13 C14 C7 -179.6(2) . . . . ? 
C13 C14 C15 C16 -0.6(4) . . . . ? 
C7 C14 C15 C16 179.5(3) . . . . ? 
C14 C15 C16 C11 -0.3(4) . . . . ? 
C12 C11 C16 C15 1.2(3) . . . . ? 
S1 C11 C16 C15 178.43(19) . . . . ? 
O1 S1 C2 O2 120.51(16) . . . . ? 
C11 S1 C2 O2 -128.07(14) . . . . ? 
H2 O2 C2 H2A -164.2 . . . . ? 
H2 O2 S1 O1 22.0 . . . . ? 
H2 O2 C1 H1A 7.5 . . . . ? 
  
loop_ 
 _geom_hbond_atom_site_label_D 
 _geom_hbond_atom_site_label_H 
 _geom_hbond_atom_site_label_A 
 _geom_hbond_distance_DH 
 _geom_hbond_distance_HA 
 _geom_hbond_distance_DA 
 _geom_hbond_angle_DHA 
 _geom_hbond_site_symmetry_A 
O2 H2 O1  0.84 1.92 2.758(3) 171.1 4_655 
C1 H1A O1  0.99 2.50 3.256(3) 133.4 4_655 
C1 H1B O2  0.99 2.78 3.732(3) 161.7 1_545 
C5 H5B O2  0.98 2.82 3.777(6) 166.7 1_545 
C12 H12 O2  0.95 2.46 3.391(3) 165.6 1_545 
C15 H15 O1  0.95 2.69 3.578(3) 155.2 4_656 
C16 H16 C15  0.95 3.07 3.918(4) 150.1 4_656 
C16 H16 C16  0.95 3.00 3.888(3) 156.7 4_656 
C16 H16 C11  0.95 3.05 3.741(3) 130.9 4_656 
  
_diffrn_measured_fraction_theta_max    0.986 
_diffrn_reflns_theta_full              30.02 
_diffrn_measured_fraction_theta_full   0.986 
_refine_diff_density_max    0.477 
_refine_diff_density_min   -0.263 
_refine_diff_density_rms    0.051 

#===END
